# Supplementary material for: Biochemical and neurophysiological effects of deficiency of the mitochondrial import protein TIMM50
Source: bioRxiv preprint, doi:10.1101/2024.05.20.594480, version 2 (2024-09-21)
Supplement: Supplemental dataset 3 [file 594480_file19.xlsx]

## Sheet: Scr vs Sh2
Majority protein IDs	Protein names	Gene names	Student's T-test Difference Sh2_Scr control	-Log Student's T-test p-value Sh2_Scr control	Student's T-test Significant Sh2_Scr control	Fold change	Inverted fold change
O70340	Neuronal pentraxin-2	Nptx2	-2.67010392083062	3.67218366198751	+	0.157115	6.36475
Q8C9S4	Coiled-coil domain-containing protein 186	Ccdc186	-2.4296883477105	1.72043845174062	+	0.185606	5.38777
Q8VCD6	Receptor expression-enhancing protein 2	Reep2	-1.74848895602756	4.33997500373744	+	0.297613	3.36006
Q91WK1	SPRY domain-containing protein 4	Spryd4	-1.58760113186306	4.21638351652202	+	0.332724	3.00549
P0C7L0	WAS/WASL-interacting protein family member 3	Wipf3	-1.46394856770833	4.78923006656538	+	0.3625	2.75862
Q9R0N5	Synaptotagmin-5	Syt5	-1.38955031500922	0.913792176494683		0.381684	2.61997
P63248	cAMP-dependent protein kinase inhibitor alpha	Pkia	-1.31797493828667	2.06450222811135	+	0.401098	2.49316
Q61599	Rho GDP-dissociation inhibitor 2	Arhgdib	-1.30107794867622	3.35694924891231	+	0.405823	2.46413
Q8K2V6	Importin-11	Ipo11	-1.29644224378798	1.97274106222843	+	0.407129	2.45622
Q9JM63	ATP-sensitive inward rectifier potassium channel 10	Kcnj10	-1.2866948445638	2.48226678219912	+	0.409889	2.43968
Q8BPQ7	Small G protein signaling modulator 1	Sgsm1	-1.28384971618652	2.24354536746098	+	0.410698	2.43488
Q9WVE8	Protein kinase C and casein kinase substrate in neurons protein 2	Pacsin2	-1.25882403055827	3.23668550398629	+	0.417884	2.39301
P47867	Secretogranin-3	Scg3	-1.2567335764567	1.63622401721812	+	0.41849	2.38954
Q7TMD7	Desmoglein-4	Dsg4	-1.22407235039605	1.73887017592529	+	0.428073	2.33605
Q9QYF1	Retinol dehydrogenase 11	Rdh11	-1.22120242648655	4.98285683413725	+	0.428925	2.33141
Q99LH2	Phosphatidylserine synthase 1	Ptdss1	-1.21891064114041	2.53112406505881	+	0.429607	2.32771
P13707	Glycerol-3-phosphate dehydrogenase [NAD(+)], cytoplasmic	Gpd1	-1.20802137586805	3.4646373693598	+	0.432862	2.31021
Q9D7A6	Signal recognition particle 19 kDa protein	Srp19	-1.20400216844347	2.91272560372362	+	0.434069	2.30378
P63141	Potassium voltage-gated channel subfamily A member 2	Kcna2	-1.20053821139865	2.6084653486929	+	0.435113	2.29825
Q8K2Q9	Shootin-1	Kiaa1598	-1.17226833767361	6.74104861640542	+	0.443723	2.25366
Q9DCB4	cAMP-regulated phosphoprotein 21	Arpp21	-1.16596137152778	1.63693758141653	+	0.445667	2.24383
P63089	Pleiotrophin	Ptn	-1.15435473124186	1.98749935422133	+	0.449267	2.22585
Q8VCH8	UBX domain-containing protein 4	Ubxn4	-1.14889441596137	0.886030839437698		0.450971	2.21744
Q80TK0	Uncharacterized protein KIAA1107	Kiaa1107	-1.10623020595974	3.3358539414397	+	0.464506	2.15282
Q8K370	Acyl-CoA dehydrogenase family member 10	Acad10	-1.09512159559462	2.19357384363954	+	0.468097	2.13631
P04370	Myelin basic protein	Mbp	-1.09059630499946	1.41318144615345	+	0.469567	2.12962
Q08509	Epidermal growth factor receptor kinase substrate 8	Eps8	-1.0787730746799	1.91130698621742	+	0.473431	2.11224
Q99J85	Neuronal pentraxin receptor	Nptxr	-1.07728915744357	2.94265918925812	+	0.473918	2.11007
Q8R3D1	TBC1 domain family member 13	Tbc1d13	-1.07005479600695	5.12204322568603	+	0.476301	2.09951
Q9D880	Mitochondrial import inner membrane translocase subunit TIM50	Timm50	-1.05290857950846	7.51140947339466	+	0.481995	2.07471
Q8BXN9	Transmembrane protein 87A	Tmem87a	-1.04381688435873	2.12936879669779	+	0.485043	2.06167
Q80WM4	Hyaluronan and proteoglycan link protein 4	Hapln4	-1.04206169976129	1.82341104603283	+	0.485633	2.05917
Q6ZQ58	La-related protein 1	Larp1	-1.0380810631646	3.0843890559861	+	0.486975	2.05349
Q3UYC0	Protein phosphatase 1H	Ppm1h	-1.01299455430773	5.22479837795315	+	0.495517	2.0181
Q9QZF2	Glypican-1;Secreted glypican-1	Gpc1	-0.999640358818905	3.67081937269514	+	0.500125	1.9995
Q91YQ3	Cold shock domain-containing protein C2	Csdc2	-0.990062713623047	6.64714665344977	+	0.503456	1.98627
Q9D0E3	LysM and putative peptidoglycan-binding domain-containing protein 1	Lysmd1	-0.976093928019207	0.714917982262863		0.508354	1.96713
Q9JKZ2	Sodium/myo-inositol cotransporter	Slc5a3	-0.961531533135307	1.79928636569251	+	0.513511	1.94738
Q8R1V4	Transmembrane emp24 domain-containing protein 4	Tmed4	-0.956171671549477	0.900424351332644		0.515423	1.94015
P11031	Activated RNA polymerase II transcriptional coactivator p15	Sub1	-0.942739274766708	0.772373613057166		0.520244	1.92217
Q03517	Secretogranin-2;Secretoneurin;Manserin	Scg2	-0.940111584133572	1.37387646399768	+	0.521193	1.91868
P15379	CD44 antigen	Cd44	-0.934808731079102	2.06019299611153	+	0.523112	1.91164
Q9QXL1	Kinesin-like protein KIF21B	Kif21b	-0.923120710584854	1.86703069182816	+	0.527367	1.89621
Q8R0A7	Uncharacterized protein KIAA0513	Kiaa0513	-0.922839906480579	8.40575341447727	+	0.52747	1.89584
Q3UI43	BRISC and BRCA1-A complex member 1	Babam1	-0.912488301595054	2.0412795094747	+	0.531268	1.88229
O70480	Vesicle-associated membrane protein 4	Vamp4	-0.909970813327366	1.26876761108311		0.532196	1.87901
Q9D6S7	Ribosome-recycling factor, mitochondrial	Mrrf	-0.905556148952908	1.37053654694532	+	0.533827	1.87327
B2RX12	Canalicular multispecific organic anion transporter 2	Abcc3	-0.874878141615124	1.15355315530748		0.5453	1.83385
Q9CYT6	Adenylyl cyclase-associated protein 2	Cap2	-0.873369004991318	10.0233263374228	+	0.545871	1.83194
P27545	Ceramide synthase 1	Cers1	-0.86871655782064	1.4277728660203	+	0.547634	1.82604
P70175	Disks large homolog 3	Dlg3	-0.855501810709637	3.29237216486504	+	0.552673	1.80939
Q7TSK3	Protocadherin-8	Pcdh8	-0.847267362806534	0.833517813486292		0.555837	1.79909
Q9CY16	28S ribosomal protein S28, mitochondrial	Mrps28	-0.841970019870335	1.56207241091659	+	0.557881	1.7925
P59279	Ras-related protein Rab-2B	Rab2b	-0.840422312418621	1.48724516603845	+	0.55848	1.79057
Q9CQK7	RWD domain-containing protein 1	Rwdd1	-0.839216868082683	4.3582161791955	+	0.558947	1.78908
Q9D2U5	N-alpha-acetyltransferase 38, NatC auxiliary subunit	Naa38	-0.836354573567707	1.9379590233639	+	0.560057	1.78553
Q3U2P1	Protein transport protein Sec24A	Sec24a	-0.833464940388996	2.82834196527462	+	0.56118	1.78196
Q9Z127	Large neutral amino acids transporter small subunit 1	Slc7a5	-0.820174958970814	2.40010008374844	+	0.566373	1.76562
Q64152	Transcription factor BTF3	Btf3	-0.820080439249676	1.11546946551542		0.56641	1.7655
P03899	NADH-ubiquinone oxidoreductase chain 3	Mtnd3	-0.818507088555229	1.06777171648899		0.567028	1.76358
Q9CZP5	Mitochondrial chaperone BCS1	Bcs1l	-0.805056465996635	2.36481961857801	+	0.57234	1.74721
Q91YH5	Atlastin-3	Atl3	-0.803399403889976	1.37892882759329	+	0.572997	1.74521
P47740	Fatty aldehyde dehydrogenase	Aldh3a2	-0.797710842556427	6.98728794562277	+	0.575261	1.73834
O35143	ATPase inhibitor, mitochondrial	Atpif1	-0.793662601047092	0.749250815597183		0.576878	1.73347
O08582	GTP-binding protein 1	Gtpbp1	-0.793020248413086	1.97128571346889	+	0.577135	1.7327
Q3UHD6	Sorting nexin-27	Snx27	-0.790630552503799	3.31657658226828	+	0.578091	1.72983
Q0VGU4		Vgf	-0.779614130655926	1.55177035693028	+	0.582523	1.71667
Q8BMQ2	General transcription factor 3C polypeptide 4	Gtf3c4	-0.776835335625542	0.899416656526044		0.583646	1.71337
Q69ZS6	Synaptic vesicle glycoprotein 2C	Sv2c	-0.771482891506619	0.991675506037946		0.585815	1.70702
P59017	Bcl-2-like protein 13	Bcl2l13	-0.770250744289822	6.5901567427812	+	0.586316	1.70557
Q8C5W3	Tubulin-specific chaperone cofactor E-like protein	Tbcel	-0.767990324232315	2.60664528926759	+	0.587235	1.7029
Q6NS82	Protein FAM134A	Fam134a	-0.765907075670032	1.07463743068355		0.588084	1.70044
Q5U4E0	Lipoma HMGIC fusion partner-like 4 protein	Lhfpl4	-0.762930340237087	1.61169474694977	+	0.589298	1.69693
P01899;P01897;P01896	H-2 class I histocompatibility antigen, D-B alpha chain;H-2 class I histocompatibility antigen, L-D alpha chain;H-2 class I histocompatibility antigen, alpha chain	H2-D1;H2-L	-0.754574457804363	2.64388607761107	+	0.592721	1.68713
Q922H9	Zinc finger protein 330	Znf330	-0.752821180555557	1.67323100144136	+	0.593442	1.68508
P14576	Signal recognition particle 54 kDa protein	Srp54	-0.750370873345268	6.60448966674282	+	0.594451	1.68223
Q9D8W7	OCIA domain-containing protein 2	Ociad2	-0.74633280436198	4.56648506404811	+	0.596117	1.67752
Q8K0P3	TLD domain-containing protein 1	Tldc1	-0.743359883626304	3.00363353015379	+	0.597347	1.67407
Q9Z0S9	Prenylated Rab acceptor protein 1	Rabac1	-0.742600970798069	1.74984294032516	+	0.597661	1.67319
Q80U87	Ubiquitin carboxyl-terminal hydrolase 8	Usp8	-0.73926713731554	0.640182576270163		0.599044	1.66933
Q9D1A2	Cytosolic non-specific dipeptidase	Cndp2	-0.738291634453667	12.8707536194773	+	0.599449	1.6682
O35166	Golgi SNAP receptor complex member 2	Gosr2	-0.738092634412975	1.3448000149162	+	0.599531	1.66797
Q5SWP3	NAC-alpha domain-containing protein 1	Nacad	-0.737353006998696	2.4891805514178	+	0.599839	1.66711
Q8K2C7	Protein OS-9	Os9	-0.733813179863823	1.33778798705806	+	0.601312	1.66303
Q6ZPU9	KIF1-binding protein	Kbp	-0.732745064629452	3.15280269939247	+	0.601758	1.6618
Q99P47	Contactin-associated protein-like 4	Cntnap4	-0.73262765672472	0.673828089243976		0.601807	1.66166
Q8BH93	MAPK-interacting and spindle-stabilizing protein-like	Mapk1ip1l	-0.732223086886936	0.968902187472353		0.601976	1.6612
P97822	Acidic leucine-rich nuclear phosphoprotein 32 family member E	Anp32e	-0.717748853895401	0.827074785491765		0.608045	1.64461
Q8BJI1	Sodium-dependent neutral amino acid transporter SLC6A17	Slc6a17	-0.715059704250759	3.92621584510293	+	0.60918	1.64155
P46096	Synaptotagmin-1	Syt1	-0.712920082939995	10.1288964167303	+	0.610084	1.63912
Q8C0P5	Coronin-2A	Coro2a	-0.712525897555881	1.23974832501043		0.610251	1.63867
Q8VD75	Huntingtin-interacting protein 1	Hip1	-0.71148363749186	2.47619227981155	+	0.610692	1.63749
P53702	Cytochrome c-type heme lyase	Hccs	-0.707825130886501	1.31197274727233	+	0.612242	1.63334
Q9D1N9	39S ribosomal protein L21, mitochondrial	Mrpl21	-0.706456714206272	0.655107494892629		0.612823	1.63179
Q3TJD7	PDZ and LIM domain protein 7	Pdlim7	-0.706140730116104	1.50918624170407	+	0.612958	1.63143
Q8CC35	Synaptopodin	Synpo	-0.704850938585071	1.6930885543885	+	0.613506	1.62998
Q9D1H7	Golgi to ER traffic protein 4 homolog	Get4	-0.704368167453342	1.25189413896801		0.613711	1.62943
Q58A65	C-Jun-amino-terminal kinase-interacting protein 4	Spag9	-0.704135682847767	1.88924367025034	+	0.61381	1.62917
Q8BIG7	Catechol O-methyltransferase domain-containing protein 1	Comtd1	-0.703766504923504	0.554481282858112		0.613967	1.62875
P41216	Long-chain-fatty-acid--CoA ligase 1	Acsl1	-0.703248129950627	9.39388415478005	+	0.614188	1.62817
Q0VE82	Copine-7	Cpne7	-0.70217620001899	2.6818286444872	+	0.614644	1.62696
Q9JHJ0	Tropomodulin-3	Tmod3	-0.700059043036568	0.818908191738602		0.615547	1.62457
Q8BTS4	Nuclear pore complex protein Nup54	Nup54	-0.697497049967446	0.462030161596873		0.616641	1.62169
Q9DB75	Cell death-inducing p53-target protein 1	Cdip1	-0.694404602050781	1.42385313373867	+	0.617964	1.61822
Q9D0G0	28S ribosomal protein S30, mitochondrial	Mrps30	-0.693655861748589	0.984764134642843		0.618285	1.61738
Q8BR63	Protein FAM177A1	Fam177a1	-0.69306140475803	0.88807446520096		0.61854	1.61671
Q99N87	28S ribosomal protein S5, mitochondrial	Mrps5	-0.690847184922962	1.29580706493652		0.61949	1.61423
Q8C7M3	E3 ubiquitin-protein ligase TRIM9	Trim9	-0.688450283474392	6.43665066510026	+	0.62052	1.61155
Q6PD19	UPF0668 protein C10orf76 homolog		-0.688426971435547	3.40276553626558	+	0.62053	1.61153
P00920	Carbonic anhydrase 2	Ca2	-0.685436460706924	0.93544445451056		0.621818	1.60819
Q9Z1T6	1-phosphatidylinositol 3-phosphate 5-kinase	Pikfyve	-0.682773166232639	1.13168052275893		0.622967	1.60522
Q8CAA7	Glucose 1,6-bisphosphate synthase	Pgm2l1	-0.681064181857636	4.38507474137894	+	0.623705	1.60332
Q8BYM5	Neuroligin-3	Nlgn3	-0.674860424465603	4.58569553514811	+	0.626393	1.59644
Q80U30	Protein CLEC16A	Clec16a	-0.674776289198135	0.666906431450498		0.626429	1.59635
Q64339	Ubiquitin-like protein ISG15	Isg15	-0.674299452039929	0.566881030677388		0.626636	1.59582
P62858	40S ribosomal protein S28	Rps28	-0.673692067464195	0.381371434800118		0.6269	1.59515
O88746	Target of Myb protein 1	Tom1	-0.672462251451282	2.96644811010133	+	0.627435	1.59379
Q99PW4	TP53-regulating kinase	Tp53rk	-0.671977149115669	0.785803631515787		0.627646	1.59325
Q9CR95	Adaptin ear-binding coat-associated protein 1	Necap1	-0.670264350043404	5.15865309440442	+	0.628392	1.59136
Q8BGZ1	Hippocalcin-like protein 4	Hpcal4	-0.669355392456055	3.56754449401805	+	0.628788	1.59036
Q9CR23	Transmembrane protein 9	Tmem9	-0.66494475470649	0.599112179835597		0.630713	1.58551
A2RSJ4	UHRF1-binding protein 1-like	Uhrf1bp1l	-0.663311216566299	1.0123508069715		0.631427	1.58371
Q8VHC3	Selenoprotein M	Selm	-0.660647286309139	1.5790757483434	+	0.632594	1.58079
O88951	Protein lin-7 homolog B	Lin7b	-0.660469479031033	1.58117009530224	+	0.632672	1.5806
Q9QXG2	Rab proteins geranylgeranyltransferase component A 1	Chm	-0.659759521484375	1.02126267531547		0.632984	1.57982
Q9CQP2	Trafficking protein particle complex subunit 2	Trappc2	-0.659480200873482	0.786305881623546		0.633106	1.57951
P16330	2,3-cyclic-nucleotide 3-phosphodiesterase	Cnp	-0.656970765855576	1.69941698677674	+	0.634209	1.57677
Q91YD9	Neural Wiskott-Aldrich syndrome protein	Wasl	-0.653904385036892	6.76486430915109	+	0.635558	1.57342
Q80YS6	Actin filament-associated protein 1	Afap1	-0.653849283854168	4.45239665008491	+	0.635582	1.57336
Q60766	Immunity-related GTPase family M protein 1	Irgm1	-0.652508417765301	0.58382864552884		0.636173	1.5719
A6H6E9	Tetratricopeptide repeat protein 23-like	Ttc23l	-0.646189795600044	1.08675905351079		0.638966	1.56503
Q9CYL5	Golgi-associated plant pathogenesis-related protein 1	Glipr2	-0.641717910766602	2.28931378313704	+	0.640949	1.56019
Q9Z1E4	Glycogen [starch] synthase, muscle	Gys1	-0.641450246175133	2.91149677494286	+	0.641068	1.5599
Q9QYR6	Microtubule-associated protein 1A;MAP1A heavy chain;MAP1 light chain LC2	Map1a	-0.641231536865234	8.25013256201342	+	0.641165	1.55966
Q8CE50	Sorting nexin-30	Snx30	-0.64074198404948	0.987383120242529		0.641383	1.55913
O35098	Dihydropyrimidinase-related protein 4	Dpysl4	-0.639191733466255	7.66589594668809	+	0.642073	1.55746
Q9CR60	Vesicle transport protein GOT1B	Golt1b	-0.632062911987305	1.84987500837003	+	0.645253	1.54978
Q9QZ73	DCN1-like protein 1	Dcun1d1	-0.631294674343533	1.79349325380019	+	0.645597	1.54895
P55821	Stathmin-2	Stmn2	-0.631086773342556	0.534017434897327		0.64569	1.54873
Q8BMA6	Signal recognition particle subunit SRP68	Srp68	-0.626906077067055	2.24489998507693	+	0.647564	1.54425
Q8BJS7	Microtubule-associated protein 10	Map10	-0.626623153686523	0.547844329145562		0.647691	1.54395
P11404	Fatty acid-binding protein, heart	Fabp3	-0.616706636216904	3.28097670474868	+	0.652158	1.53337
P59481	VIP36-like protein	Lman2l	-0.615121841430664	0.506929969039951		0.652875	1.53169
Q8C419	Probable G-protein coupled receptor 158	Gpr158	-0.615064197116428	1.96474768906119	+	0.652901	1.53163
P97313	DNA-dependent protein kinase catalytic subunit	Prkdc	-0.608918719821506	0.62742515145909		0.655688	1.52512
Q99N93	39S ribosomal protein L16, mitochondrial	Mrpl16	-0.604898240831165	1.94715419174565	+	0.657518	1.52087
Q8R191	Synaptogyrin-3	Syngr3	-0.604086346096462	3.9778760318157	+	0.657888	1.52002
Q9ERT9	Protein phosphatase 1 regulatory subunit 1A	Ppp1r1a	-0.601601282755531	3.98186530869112	+	0.659022	1.5174
O88736	3-keto-steroid reductase	Hsd17b7	-0.599117279052734	0.989038042795654		0.660158	1.51479
Q8R361	Rab11 family-interacting protein 5	Rab11fip5	-0.594204372829861	3.79346319338717	+	0.66241	1.50964
Q8R4S0	Protein phosphatase 1 regulatory subunit 14C	Ppp1r14c	-0.591232723659939	1.54355768881488	+	0.663775	1.50653
Q8BMF3	NADP-dependent malic enzyme, mitochondrial	Me3	-0.58636156717936	0.540142831450159		0.66602	1.50146
Q80VP0	Tectonin beta-propeller repeat-containing protein 1	Tecpr1	-0.586286968655056	0.581252526868771		0.666055	1.50138
Q91YX5	Acyl-CoA:lysophosphatidylglycerol acyltransferase 1	Lpgat1	-0.585682339138454	1.49871788527496	+	0.666334	1.50075
Q5SW19	Clustered mitochondria protein homolog	Cluh	-0.58482551574707	3.48592851976397	+	0.66673	1.49986
O70161	Phosphatidylinositol 4-phosphate 5-kinase type-1 gamma	Pip5k1c	-0.584529028998478	5.95841193891539	+	0.666867	1.49955
Q9WV69	Dematin	Dmtn	-0.58188523186578	4.13745470980143	+	0.66809	1.4968
Q9D964	Glycine amidinotransferase, mitochondrial	Gatm	-0.578680674235027	1.68646925984336	+	0.669576	1.49348
Q922D4	Serine/threonine-protein phosphatase 6 regulatory subunit 3	Ppp6r3	-0.573172251383465	0.642338652846066		0.672137	1.48779
Q8K2H2	OTU domain-containing protein 6B	Otud6b	-0.572994232177734	0.73159566144711		0.67222	1.48761
Q8R1F6	Protein HID1	Hid1	-0.57116911146376	2.32131108129026	+	0.673071	1.48573
Q6R5N8	Toll-like receptor 13	Tlr13	-0.571139441596134	0.497244616064025		0.673085	1.4857
Q60597	2-oxoglutarate dehydrogenase, mitochondrial	Ogdh	-0.570829179551868	8.38524768831313	+	0.67323	1.48538
Q8BTV2	Cleavage and polyadenylation specificity factor subunit 7	Cpsf7	-0.570052464803059	0.724845757029718		0.673592	1.48458
Q8R0X7	Sphingosine-1-phosphate lyase 1	Sgpl1	-0.566953870985245	1.17430290759984		0.675041	1.48139
Q6PNC0	DmX-like protein 1	Dmxl1	-0.566787295871311	0.863724734270781		0.675119	1.48122
Q922Q9	Chitinase domain-containing protein 1	Chid1	-0.562380472819012	1.44764058924957	+	0.677184	1.4767
P61620	Protein transport protein Sec61 subunit alpha isoform 1	Sec61a1	-0.562148623996311	0.858378710927579		0.677293	1.47647
Q9CQ79	Thioredoxin domain-containing protein 9	Txndc9	-0.561904695298935	2.06936775146088	+	0.677407	1.47622
Q9CRA4	Methylsterol monooxygenase 1	Msmo1	-0.561580869886612	2.10659763021717	+	0.677559	1.47589
Q9D3P8	Plasminogen receptor (KT)	Plgrkt	-0.559563742743599	0.917353489750191		0.678507	1.47382
Q8BXR1	Probable cationic amino acid transporter	Slc7a14	-0.558828989664715	1.86205773565289	+	0.678853	1.47307
P60670	Nuclear protein localization protein 4 homolog	Nploc4	-0.557557000054253	4.82886976270642	+	0.679452	1.47177
Q8BTG3	T-complex protein 11-like protein 1	Tcp11l1	-0.557069566514759	2.06746796475626	+	0.679681	1.47128
Q80ZW2	Protein THEM6	Them6	-0.557060877482098	2.04428576295753	+	0.679685	1.47127
P57759	Endoplasmic reticulum resident protein 29	Erp29	-0.555578443739151	4.85232255052294	+	0.680384	1.46976
Q9EP72	ER membrane protein complex subunit 7	Emc7	-0.555554495917427	0.600759300602131		0.680395	1.46973
Q63912	Oligodendrocyte-myelin glycoprotein	Omg	-0.554395887586807	0.526650800347334		0.680942	1.46855
P21981	Protein-glutamine gamma-glutamyltransferase 2	Tgm2	-0.553615781995983	0.936699582732609		0.68131	1.46776
Q8C996	Transmembrane protein 163	Tmem163	-0.552185694376625	1.2318214292595		0.681986	1.46631
P51855	Glutathione synthetase	Gss	-0.550731023152668	3.7088664318806	+	0.682674	1.46483
Q80UY2	E3 ubiquitin-protein ligase KCMF1	Kcmf1	-0.550309922960071	0.77707092961606		0.682873	1.4644
Q99JF5	Diphosphomevalonate decarboxylase	Mvd	-0.549639595879448	0.389566739915555		0.683191	1.46372
Q60790	Ras GTPase-activating protein 3	Rasa3	-0.549532996283638	1.13786817842137		0.683241	1.46361
Q8BX70	Vacuolar protein sorting-associated protein 13C	Vps13c	-0.548581441243488	0.358184822550522		0.683692	1.46265
P56546	C-terminal-binding protein 2	Ctbp2	-0.547328101264107	0.370269389437991		0.684286	1.46138
P54830	Tyrosine-protein phosphatase non-receptor type 5	Ptpn5	-0.546741061740448	0.913341616766436		0.684565	1.46078
P97783	Protein AF1q	Mllt11	-0.545761108398438	2.7306088604459	+	0.68503	1.45979
Q91VW3	SH3 domain-binding glutamic acid-rich-like protein 3	Sh3bgrl3	-0.544545279608833	3.79102856888935	+	0.685607	1.45856
Q9CQX8	28S ribosomal protein S36, mitochondrial	Mrps36	-0.544506496853298	2.95900705815691	+	0.685626	1.45852
P51655	Glypican-4;Secreted glypican-4	Gpc4	-0.544210433959961	5.646567956374	+	0.685767	1.45822
Q8VHI6	Wiskott-Aldrich syndrome protein family member 3	Wasf3	-0.543862024943035	0.897063813616242		0.685932	1.45787
Q9DCD6;Q8R3R8	Gamma-aminobutyric acid receptor-associated protein;Gamma-aminobutyric acid receptor-associated protein-like 1	Gabarap;Gabarapl1	-0.5435430738661	0.521209660702082		0.686084	1.45755
Q61165	Sodium/hydrogen exchanger 1	Slc9a1	-0.541358523898655	1.17484452636643		0.687124	1.45534
Q9D074	E3 ubiquitin-protein ligase MGRN1	Mgrn1	-0.53637589348687	1.50106442331316	+	0.689501	1.45032
Q8K0T4	Katanin p60 ATPase-containing subunit A-like 1	Katnal1	-0.536228391859265	0.742567615011151		0.689571	1.45018
Q9D1G2	Phosphomevalonate kinase	Pmvk	-0.534909566243488	2.19969279781801	+	0.690202	1.44885
Q149F3	Eukaryotic peptide chain release factor GTP-binding subunit ERF3B	Gspt2	-0.534745958116321	1.25528957155118		0.69028	1.44869
Q3TC33	Coiled-coil domain-containing protein 127	Ccdc127	-0.532253265380859	1.03845468964552		0.691474	1.44619
Q9D428	Golgin subfamily A member 7B	GOLGA7B	-0.53190803527832	1.1647463712975		0.691639	1.44584
Q6PAM0	5-AMP-activated protein kinase subunit beta-2	Prkab2	-0.530037138197159	1.23564298367291		0.692537	1.44397
Q9DAU1	Protein canopy homolog 3	Cnpy3	-0.527131610446506	3.27674192824735	+	0.693933	1.44106
Q9CR20	Immediate early response 3-interacting protein 1	Ier3ip1	-0.526704152425129	0.785104043777595		0.694139	1.44063
Q91VJ4	Serine/threonine-protein kinase 38	Stk38	-0.524741702609592	0.401066983639406		0.695084	1.43868
P28741	Kinesin-like protein KIF3A	Kif3a	-0.52392069498698	1.40750894566673	+	0.695479	1.43786
Q8VCN9	Tubulin-specific chaperone C	Tbcc	-0.522305382622616	0.78931771370761		0.696258	1.43625
Q8JZR6	Electroneutral sodium bicarbonate exchanger 1	Slc4a8	-0.521816041734482	2.34768501773809	+	0.696495	1.43576
Q505D7	Optic atrophy 3 protein homolog	Opa3	-0.521207173665363	1.26420796075034		0.696789	1.43516
Q8BP00	IQ calmodulin-binding motif-containing protein 1	Iqcb1	-0.520137786865234	1.76346736513084	+	0.697305	1.43409
Q63739	Protein tyrosine phosphatase type IVA 1	Ptp4a1	-0.519445419311523	0.560061700516665		0.69764	1.4334
Q8BFY6	Peflin	Pef1	-0.51868502298991	0.764518701985919		0.698008	1.43265
Q91YM2	Rho GTPase-activating protein 35	Arhgap35	-0.515129937065971	2.85879235325901	+	0.69973	1.42912
Q6ZQ82	Rho GTPase-activating protein 26	Arhgap26	-0.512978659735786	1.17541057329252		0.700774	1.42699
P50153	Guanine nucleotide-binding protein G(I)/G(S)/G(O) subunit gamma-4	Gng4	-0.511944664849175	2.70246913726361	+	0.701277	1.42597
Q68FL4	Putative adenosylhomocysteinase 3	Ahcyl2	-0.511763254801433	4.79173825354009	+	0.701365	1.42579
P60824	Cold-inducible RNA-binding protein	Cirbp	-0.510973400539822	3.43597698946801	+	0.701749	1.42501
Q9D7B7	Probable glutathione peroxidase 8	Gpx8	-0.509689966837563	0.643117751855624		0.702373	1.42374
P53810	Phosphatidylinositol transfer protein alpha isoform	Pitpna	-0.508545769585506	6.53851826180658	+	0.702931	1.42262
Q8R066	Complement C1q tumor necrosis factor-related protein 4	C1qtnf4	-0.505805757310657	1.49707769606289	+	0.704267	1.41992
P80560	Receptor-type tyrosine-protein phosphatase N2	Ptprn2	-0.50404167175293	1.65459051513388	+	0.705129	1.41818
Q93092	Transaldolase	Taldo1	-0.503955841064453	4.95775610138843	+	0.705171	1.4181
Q9D710	Thioredoxin-related transmembrane protein 2	Tmx2	-0.503555297851563	3.04236851008227	+	0.705366	1.4177
Q99PJ0	Neurotrimin	Ntm	-0.503513971964516	3.62086122695232	+	0.705387	1.41766
Q3U4G3	Xyloside xylosyltransferase 1	Xxylt1	-0.502767986721462	0.843348833824398		0.705751	1.41693
Q59J78	Mimitin, mitochondrial	Ndufaf2	-0.502437591552734	0.511531584856118		0.705913	1.41661
Q8R4V4	Carboxypeptidase Z	Cpz	-0.501002417670357	0.539841641987182		0.706616	1.4152
Q91WJ8	Far upstream element-binding protein 1	Fubp1	-0.50061649746365	3.71129769536335	+	0.706805	1.41482
Q9D7I5	Phospholysine phosphohistidine inorganic pyrophosphate phosphatase	Lhpp	-0.500141355726456	2.25829852875154	+	0.707038	1.41435
Q99MK8	Beta-adrenergic receptor kinase 1	Adrbk1	-0.499384774102108	4.43717796817931	+	0.707408	1.41361
Q60673	Receptor-type tyrosine-protein phosphatase-like N	Ptprn	-0.497653749254013	0.860770047896522		0.708258	1.41192
Q8BVQ5	Protein phosphatase methylesterase 1	Ppme1	-0.49408785502116	3.67750198263195	+	0.71001	1.40843
Q9WTQ8	Mitochondrial import inner membrane translocase subunit Tim23	Timm23	-0.493607203165688	0.676114959487717		0.710247	1.40796
O35405	Phospholipase D3	Pld3	-0.492497973971897	4.71518837737022	+	0.710793	1.40688
Q61036	Serine/threonine-protein kinase PAK 3	Pak3	-0.492016262478302	3.1577116969684	+	0.711031	1.40641
P62274	40S ribosomal protein S29	Rps29	-0.491634156968857	3.17575939566344	+	0.711219	1.40604
Q922Q8	Leucine-rich repeat-containing protein 59	Lrrc59	-0.491441090901695	3.44233358906953	+	0.711314	1.40585
Q61696;P17879	Heat shock 70 kDa protein 1A;Heat shock 70 kDa protein 1B	Hspa1a;Hspa1b	-0.490420235527885	2.35089376801387	+	0.711818	1.40485
Q9JHU2	Palmdelphin	Palmd	-0.486412048339844	0.988731832445186		0.713798	1.40096
Q9R233	Tapasin	Tapbp	-0.484869639078774	1.10108934718457		0.714562	1.39946
Q8CC21	Tetratricopeptide repeat protein 19, mitochondrial	Ttc19	-0.484489440917969	1.62545182324767	+	0.71475	1.39909
Q9JKD3	Secretory carrier-associated membrane protein 5	Scamp5	-0.48279317220052	2.63793754912178	+	0.715591	1.39745
Q5EG47	5-AMP-activated protein kinase catalytic subunit alpha-1	Prkaa1	-0.481725268893772	0.726948438505266		0.716121	1.39641
P56383;Q9CR84;P56384	ATP synthase F(0) complex subunit C2, mitochondrial;ATP synthase F(0) complex subunit C1, mitochondrial;ATP synthase F(0) complex subunit C3, mitochondrial	Atp5g2;Atp5g1;Atp5g3	-0.480226940578884	0.822596523788611		0.716865	1.39496
Q6NZJ6	Eukaryotic translation initiation factor 4 gamma 1	Eif4g1	-0.4798035091824	5.6956969116724	+	0.717075	1.39455
Q91VR8	Protein BRICK1	Brk1	-0.477863735622833	5.23275787245376	+	0.71804	1.39268
Q8CCJ3	E3 UFM1-protein ligase 1	Ufl1	-0.477731280856659	1.29871543291468		0.718106	1.39255
Q99J83	Autophagy protein 5	Atg5	-0.472078323364258	1.54190006330473	+	0.720925	1.38711
Q99N95	39S ribosomal protein L3, mitochondrial	Mrpl3	-0.470996856689453	2.37861339185561	+	0.721466	1.38607
P16045	Galectin-1	Lgals1	-0.469334496392143	0.888582774394015		0.722298	1.38447
Q6PDY2	2-aminoethanethiol dioxygenase	Ado	-0.468835830688477	0.493534588978584		0.722547	1.38399
P55258	Ras-related protein Rab-8A	Rab8a	-0.468470043606228	2.91044152203044	+	0.722731	1.38364
P57780	Alpha-actinin-4	Actn4	-0.467618730333118	3.09847501407908	+	0.723157	1.38283
O35621	Phosphomannomutase 1	Pmm1	-0.467167960272892	0.663838262021313		0.723383	1.38239
Q80TY0	Formin-binding protein 1	Fnbp1	-0.464093738132053	0.260519348694396		0.724926	1.37945
Q61543	Golgi apparatus protein 1	Glg1	-0.461275100708008	7.72107462014674	+	0.726344	1.37676
Q505F5	Leucine-rich repeat-containing protein 47	Lrrc47	-0.459994845920139	3.23265336278015	+	0.726989	1.37554
P12367	cAMP-dependent protein kinase type II-alpha regulatory subunit	Prkar2a	-0.45929781595866	4.10525842696667	+	0.72734	1.37487
Q9R008	Mevalonate kinase	Mvk	-0.458701875474716	0.611768775189947		0.727641	1.3743
P17095	High mobility group protein HMG-I/HMG-Y	Hmga1	-0.458567089504665	0.782683131678108		0.727709	1.37418
Q8BFP9	[Pyruvate dehydrogenase (acetyl-transferring)] kinase isozyme 1, mitochondrial	Pdk1	-0.457396825154621	1.36021671505909	+	0.728299	1.37306
Q91VK1	Basic leucine zipper and W2 domain-containing protein 2	Bzw2	-0.456531736585827	1.19391158256339		0.728736	1.37224
P32037	Solute carrier family 2, facilitated glucose transporter member 3	Slc2a3	-0.455016665988499	1.77192478788019	+	0.729502	1.3708
P97315	Cysteine and glycine-rich protein 1	Csrp1	-0.454047520955402	1.51374993502555	+	0.729992	1.36988
Q99K28	ADP-ribosylation factor GTPase-activating protein 2	Arfgap2	-0.451439115736218	0.813967621419033		0.731313	1.3674
Q9CPU2	NADH dehydrogenase [ubiquinone] 1 beta subcomplex subunit 2, mitochondrial	Ndufb2	-0.449890348646374	1.40270654630675	+	0.732098	1.36594
Q9D958	Signal peptidase complex subunit 1	Spcs1	-0.44966655307346	0.602342592080179		0.732212	1.36572
Q9CQH3	NADH dehydrogenase [ubiquinone] 1 beta subcomplex subunit 5, mitochondrial	Ndufb5	-0.447964138454861	1.89014793680918	+	0.733077	1.36411
Q8BX94	Oxysterol-binding protein-related protein 2	Osbpl2	-0.447527779473202	1.60402082057798	+	0.733298	1.3637
Q99PG2	Opioid growth factor receptor	Ogfr	-0.447074042426216	1.35962311952011	+	0.733529	1.36327
Q9R099	Transducin beta-like protein 2	Tbl2	-0.446639378865562	1.47113461435554	+	0.73375	1.36286
Q8BH24	Transmembrane 9 superfamily member 4	Tm9sf4	-0.445181528727215	2.85417150544052	+	0.734492	1.36149
Q9D2N4	Dystrobrevin alpha	Dtna	-0.443999820285374	1.3601670813574	+	0.735094	1.36037
Q99KQ4	Nicotinamide phosphoribosyltransferase	Nampt	-0.443859736124676	3.21306551182066	+	0.735165	1.36024
O35188	Fractalkine;Processed fractalkine	Cx3cl1	-0.442703035142689	1.83254047621317	+	0.735755	1.35915
Q8BSS9	Liprin-alpha-2	Ppfia2	-0.442267523871529	3.06729546467459	+	0.735977	1.35874
Q8R1F1	Niban-like protein 1	Fam129b	-0.44220903184679	1.42623434490482	+	0.736007	1.35868
P61166	Transmembrane protein 258	Tmem258	-0.440365473429363	0.672531308103433		0.736948	1.35695
Q3TXX4	Vesicular glutamate transporter 1	Slc17a7	-0.439571380615234	1.90452079692317	+	0.737354	1.3562
Q3TIR3	Synembryn-A	Ric8a	-0.439422819349502	2.38982887930261	+	0.73743	1.35606
Q8BZS9	Putative pre-mRNA-splicing factor ATP-dependent RNA helicase DHX32	Dhx32	-0.438554975721569	0.480453733312042		0.737873	1.35525
Q9CQE3	28S ribosomal protein S17, mitochondrial	Mrps17	-0.437559763590492	0.901089929674123		0.738382	1.35431
Q8BL65	Actin-binding LIM protein 2	Ablim2	-0.437372419569225	0.304567405949435		0.738478	1.35414
Q8BMP6	Golgi resident protein GCP60	Acbd3	-0.435257381863064	1.48806482752593	+	0.739562	1.35215
P62892	60S ribosomal protein L39	Rpl39	-0.434286965264214	1.8318671452043	+	0.740059	1.35124
Q9CQB5	CDGSH iron-sulfur domain-containing protein 2	Cisd2	-0.434220419989693	2.34388190286039	+	0.740094	1.35118
O09131	Glutathione S-transferase omega-1	Gsto1	-0.433920330471462	3.88208352823691	+	0.740248	1.3509
O35239	Tyrosine-protein phosphatase non-receptor type 9	Ptpn9	-0.433841281467014	0.550136658657726		0.740288	1.35083
Q3TMP8	Trimeric intracellular cation channel type A	Tmem38a	-0.433606253729923	1.74775081687041	+	0.740409	1.35061
Q8BH57	WD repeat-containing protein 48	Wdr48	-0.433172225952148	0.626453963442395		0.740631	1.3502
P48428	Tubulin-specific chaperone A	Tbca	-0.433102501763237	1.79312281870121	+	0.740667	1.35013
Q91WC3	Long-chain-fatty-acid--CoA ligase 6	Acsl6	-0.432434717814129	5.15117451886784	+	0.74101	1.34951
Q80TL4	Protein KIAA1045	Kiaa1045	-0.432310316297741	3.25198841102337	+	0.741074	1.34939
Q6NVF0	Inositol polyphosphate 5-phosphatase OCRL-1	Ocrl	-0.432268566555447	0.358593299130472		0.741096	1.34935
Q60631	Growth factor receptor-bound protein 2	Grb2	-0.430913289388023	2.28420910528492	+	0.741792	1.34809
Q8C3X8	Lipase maturation factor 2	Lmf2	-0.430599848429363	1.02745697583191		0.741953	1.34779
P34914	Bifunctional epoxide hydrolase 2;Cytosolic epoxide hydrolase 2;Lipid-phosphate phosphatase	Ephx2	-0.429512659708656	1.36641858045472	+	0.742513	1.34678
P97952	Sodium channel subunit beta-1	Scn1b	-0.428227954440647	0.344795167126391		0.743174	1.34558
Q8BFU3	RING finger protein 214	Rnf214	-0.426329082912869	0.418157792487505		0.744153	1.34381
P38585	Tubulin--tyrosine ligase	Ttl	-0.426235410902237	0.507843697172013		0.744201	1.34372
Q99MU3	Double-stranded RNA-specific adenosine deaminase	Adar	-0.425184885660805	0.564351766241695		0.744743	1.34274
P97379	Ras GTPase-activating protein-binding protein 2	G3bp2	-0.42421086629232	6.31556262777074	+	0.745246	1.34184
Q91V61	Sideroflexin-3	Sfxn3	-0.423248714870876	6.48988595930205	+	0.745743	1.34094
Q60932	Voltage-dependent anion-selective channel protein 1	Vdac1	-0.422808117336697	4.17885902079253	+	0.745971	1.34053
O54879	High mobility group protein B3	Hmgb3	-0.422801123725041	0.519250756447468		0.745975	1.34053
P60060	Protein transport protein Sec61 subunit gamma	Sec61g	-0.422032674153645	1.902120328682	+	0.746372	1.33981
Q62241	U1 small nuclear ribonucleoprotein C	Snrpc	-0.421481662326389	0.470615053208501		0.746657	1.3393
Q80VJ2	Steroid receptor RNA activator 1	Sra1	-0.420664257473415	0.81416803415747		0.747081	1.33854
A2AHC3	Calmodulin-regulated spectrin-associated protein 1	Camsap1	-0.418959511650932	0.950151221516475		0.747964	1.33696
Q91W89	Alpha-mannosidase 2C1	Man2c1	-0.418923483954536	0.519756822016933		0.747983	1.33693
Q9D289	Trafficking protein particle complex subunit 6B	Trappc6b	-0.418346616956924	1.053175120021		0.748282	1.3364
P61021	Ras-related protein Rab-5B	Rab5b	-0.417851130167644	4.4444662971826	+	0.748539	1.33594
Q8BIF0	CD99 antigen-like protein 2	Cd99l2	-0.417340808444553	1.75727398358133	+	0.748804	1.33546
Q9DB73	NADH-cytochrome b5 reductase 1	Cyb5r1	-0.415611690945099	1.5555278365017	+	0.749702	1.33386
Q9WVQ1	Membrane-associated guanylate kinase, WW and PDZ domain-containing protein 2	Magi2	-0.415269215901692	1.37718233886916	+	0.74988	1.33355
Q78JW9	Ubiquitin domain-containing protein UBFD1	Ubfd1	-0.414797465006512	1.26599018822347		0.750125	1.33311
Q9EPL9	Peroxisomal acyl-coenzyme A oxidase 3	Acox3	-0.41436767578125	2.2502038052934	+	0.750348	1.33271
Q9JK42	[Pyruvate dehydrogenase (acetyl-transferring)] kinase isozyme 2, mitochondrial	Pdk2	-0.413928985595703	0.771234800149449		0.750576	1.33231
Q920A5	Retinoid-inducible serine carboxypeptidase	Scpep1	-0.413533316718208	0.793510199781667		0.750782	1.33194
Q61749	Translation initiation factor eIF-2B subunit delta	Eif2b4	-0.411521063910588	1.11605932361589		0.75183	1.33009
Q8BSY0	Aspartyl/asparaginyl beta-hydroxylase	Asph	-0.411415312025284	1.03995504946239		0.751885	1.32999
Q6WVG3	BTB/POZ domain-containing protein KCTD12	Kctd12	-0.411254247029621	2.7093545132474	+	0.751969	1.32984
Q9WV34	MAGUK p55 subfamily member 2	Mpp2	-0.410625245836048	5.0058782389763	+	0.752297	1.32926
Q5NCF2	Trafficking protein particle complex subunit 1	Trappc1	-0.410392973158096	1.36040850103768	+	0.752418	1.32905
Q9WV18	Gamma-aminobutyric acid type B receptor subunit 1	Gabbr1	-0.409383985731338	0.313181340075347		0.752945	1.32812
Q08890	Iduronate 2-sulfatase	Ids	-0.409248987833656	0.279215962353252		0.753015	1.32799
Q64455	Receptor-type tyrosine-protein phosphatase eta	Ptprj	-0.409106784396702	0.920275963921401		0.753089	1.32786
Q8C0L0	Thioredoxin-related transmembrane protein 4	Tmx4	-0.40844217936198	2.99178507690903	+	0.753436	1.32725
Q8K1R3	Polyribonucleotide nucleotidyltransferase 1, mitochondrial	Pnpt1	-0.407809787326389	0.392872598057224		0.753767	1.32667
Q8JZQ2	AFG3-like protein 2	Afg3l2	-0.407258351643883	1.19087442423511		0.754055	1.32616
Q9JKC8	AP-3 complex subunit mu-1	Ap3m1	-0.407088173760307	2.87808620423281	+	0.754144	1.32601
Q8BTH8	Casein kinase I isoform gamma-1	Csnk1g1	-0.406192779541016	1.12855141720102		0.754612	1.32518
Q6DID7	Protein wntless homolog	Wls	-0.405550003051758	0.79041550863211		0.754948	1.32459
Q64516	Glycerol kinase	Gk	-0.404793633355034	2.37186026623753	+	0.755344	1.3239
Q3UFS0	Protein zyg-11 homolog B	Zyg11b	-0.404695510864258	1.49077866546541	+	0.755396	1.32381
Q91X78	Erlin-1	Erlin1	-0.4032342698839	1.0211117734005		0.756161	1.32247
Q8BLN5	Lanosterol synthase	Lss	-0.402933968438042	0.807304546185389		0.756319	1.32219
P08207	Protein S100-A10	S100a10	-0.400134404500324	0.943185503595951		0.757788	1.31963
P24288	Branched-chain-amino-acid aminotransferase, cytosolic	Bcat1	-0.398977915445965	2.38395059564988	+	0.758395	1.31857
Q9D328	Transmembrane protein 35	Tmem35	-0.398513793945313	3.52929035016874	+	0.758639	1.31815
P63044	Vesicle-associated membrane protein 2	Vamp2	-0.398340225219727	3.41431763093415	+	0.758731	1.31799
P97798	Neogenin	Neo1	-0.397318098280167	1.28040468363593		0.759268	1.31706
P62500	TSC22 domain family protein 1	Tsc22d1	-0.396621492173939	2.33299967734806	+	0.759635	1.31642
Q8K0Z7	Translational activator of cytochrome c oxidase 1	Taco1	-0.396504720052082	0.813452717318919		0.759697	1.31631
O88271	Craniofacial development protein 1	Cfdp1	-0.396420372856987	1.00131302549471		0.759741	1.31624
Q6GQS1	Calcium-binding mitochondrial carrier protein SCaMC-3	Slc25a23	-0.396187040540905	1.94435909938402	+	0.759864	1.31603
Q9JHG6	Calcipressin-1	Rcan1	-0.394447538587784	0.595451781198965		0.760781	1.31444
P49446	Receptor-type tyrosine-protein phosphatase epsilon	Ptpre	-0.394342846340603	0.379161217940344		0.760836	1.31434
Q91WG5	5-AMP-activated protein kinase subunit gamma-2	Prkag2	-0.393473731146919	0.522660860270012		0.761294	1.31355
Q8BI84	Melanoma inhibitory activity protein 3	Mia3	-0.393404218885635	2.54030166236335	+	0.761331	1.31349
Q924M7	Mannose-6-phosphate isomerase	Mpi	-0.393227259318035	4.98377669748605	+	0.761424	1.31333
Q80VC9	Calmodulin-regulated spectrin-associated protein 3	Camsap3	-0.393004099527996	0.791897004745432		0.761542	1.31312
Q9CY73	39S ribosomal protein L44, mitochondrial	Mrpl44	-0.392110188802082	0.871710079018293		0.762014	1.31231
Q9CZU6	Citrate synthase, mitochondrial	Cs	-0.391567018296982	6.18793093887336	+	0.762301	1.31182
Q9JKS5	Intracellular hyaluronan-binding protein 4	Habp4	-0.390702989366318	0.677275200686862		0.762758	1.31103
O55135	Eukaryotic translation initiation factor 6	Eif6	-0.390547010633679	0.301263314063281		0.76284	1.31089
Q80TJ1	Calcium-dependent secretion activator 1	Cadps	-0.389616648356121	6.36870503318833	+	0.763332	1.31005
Q8VHK5	Membrane protein MLC1	Mlc1	-0.388554467095268	0.520779261960124		0.763895	1.30908
P28271	Cytoplasmic aconitate hydratase	Aco1	-0.386003918117947	1.73221311071805	+	0.765246	1.30677
Q80U72	Protein scribble homolog	Scrib	-0.38566568162706	0.653618514305152		0.765426	1.30646
Q8BPU7	Engulfment and cell motility protein 1	Elmo1	-0.384375254313149	1.23315998331949		0.766111	1.30529
Q99LC2	Cleavage stimulation factor subunit 1	Cstf1	-0.38427840338813	0.387796307680383		0.766162	1.30521
A2A8L5	Receptor-type tyrosine-protein phosphatase F	Ptprf	-0.384078343709309	0.745896028499244		0.766268	1.30503
Q62421	Endophilin-A3	Sh3gl3	-0.383757061428494	0.624182956705469		0.766439	1.30474
Q8R071	Inositol-trisphosphate 3-kinase A	Itpka	-0.383236355251736	0.406549346725562		0.766716	1.30426
Q8R555	Cartilage acidic protein 1	Crtac1	-0.382452646891277	4.9450168308893	+	0.767132	1.30356
Q9D975	Sulfiredoxin-1	Srxn1	-0.381033367580837	1.34019698923523	+	0.767887	1.30227
B1AY13	Ubiquitin carboxyl-terminal hydrolase 24	Usp24	-0.380999459160698	1.33424472434175	+	0.767905	1.30224
Q80Z38	SH3 and multiple ankyrin repeat domains protein 2	Shank2	-0.380300309922958	2.89175749002054	+	0.768278	1.30161
Q8R570	Synaptosomal-associated protein 47	Snap47	-0.379419538709854	5.34515555366229	+	0.768747	1.30082
Q8K3C3	Protein LZIC	Lzic	-0.379406611124672	1.77992465399477	+	0.768754	1.30081
Q8BHN0	Protein phosphatase 1L	Ppm1l	-0.378427505493164	0.406516217765001		0.769276	1.29992
Q91WG4	Elongator complex protein 2	Elp2	-0.377787907918293	0.358970933100209		0.769617	1.29935
O88196	E3 ubiquitin-protein ligase TTC3	Ttc3	-0.377365748087563	0.783567845767639		0.769842	1.29897
Q8C115	Pleckstrin homology domain-containing family H member 2	Plekhh2	-0.376567840576172	0.12051772124479		0.770268	1.29825
Q9D0B6	Protein PBDC1	Pbdc1	-0.376302931043835	0.487411075975891		0.770409	1.29801
Q9R111	Guanine deaminase	Gda	-0.376207563612198	2.46106960150931	+	0.77046	1.29793
Q5FWK3	Rho GTPase-activating protein 1	Arhgap1	-0.375535541110569	3.88670783023328	+	0.770819	1.29732
Q07113	Cation-independent mannose-6-phosphate receptor	Igf2r	-0.374944474962025	0.827587363318198		0.771135	1.29679
Q7TNG5	Echinoderm microtubule-associated protein-like 2	Eml2	-0.37490569220649	2.54718862184501	+	0.771156	1.29675
Q62393	Tumor protein D52	Tpd52	-0.374613867865669	1.88805383937326	+	0.771312	1.29649
Q9CZT8	Ras-related protein Rab-3B	Rab3b	-0.374547534518772	5.92601251517459	+	0.771347	1.29643
Q9DC50	Peroxisomal carnitine O-octanoyltransferase	Crot	-0.374007754855686	0.490620011801798		0.771636	1.29595
Q3UH66	Serine/threonine-protein kinase WNK2	Wnk2	-0.373229556613499	0.631639348277098		0.772052	1.29525
O54724	Polymerase I and transcript release factor	Ptrf	-0.372118843926323	0.333286753162924		0.772647	1.29425
Q9CXR1	Dehydrogenase/reductase SDR family member 7	Dhrs7	-0.372034496731231	0.812602872769576		0.772692	1.29418
P53612	Geranylgeranyl transferase type-2 subunit beta	Rabggtb	-0.371878941853844	0.814222586887552		0.772775	1.29404
Q9CR67	Transmembrane protein 33	Tmem33	-0.370166778564453	0.914241381585896		0.773693	1.2925
P00397	Cytochrome c oxidase subunit 1	Mtco1	-0.369646496242947	0.727373603313034		0.773972	1.29204
Q64331	Unconventional myosin-VI	Myo6	-0.369629542032879	1.18571302965029		0.773981	1.29202
Q7TN99;Q812E0	Cytoplasmic polyadenylation element-binding protein 3;Cytoplasmic polyadenylation element-binding protein 2	Cpeb3;Cpeb2	-0.369508955213757	2.5122063231645	+	0.774046	1.29191
Q9CQT1	Methylthioribose-1-phosphate isomerase	Mri1	-0.368949042426216	0.48870543924825		0.774346	1.29141
Q9CQM5	Thioredoxin domain-containing protein 17	Txndc17	-0.368359671698677	3.3110595125069	+	0.774663	1.29088
D3YZU1	SH3 and multiple ankyrin repeat domains protein 1	Shank1	-0.367768605550129	0.860635792146952		0.77498	1.29036
Q05909	Receptor-type tyrosine-protein phosphatase gamma	Ptprg	-0.367705451117622	0.216041585005777		0.775014	1.2903
Q3TGW2	Endonuclease/exonuclease/phosphatase family domain-containing protein 1	Eepd1	-0.366665310329861	1.5651919405933	+	0.775573	1.28937
O88998	Noelin	Olfm1	-0.365841547648113	1.03169385361877		0.776016	1.28863
Q9CTY5	Calcium uptake protein 3, mitochondrial	Micu3	-0.36543189154731	0.763209797733748		0.776236	1.28827
Q91YP0	L-2-hydroxyglutarate dehydrogenase, mitochondrial	L2hgdh	-0.365161683824329	0.848677948250296		0.776382	1.28803
Q9D868	Peptidyl-prolyl cis-trans isomerase H	Ppih	-0.365043640136719	0.854795270652959		0.776445	1.28792
Q9CQS8	Protein transport protein Sec61 subunit beta	Sec61b	-0.363894356621635	0.603014118053421		0.777064	1.2869
P37804	Transgelin	Tagln	-0.363676071166992	0.716868474707038		0.777182	1.2867
Q5DU02	Ubiquitin carboxyl-terminal hydrolase 22	Usp22	-0.363415400187176	1.10067846623543		0.777322	1.28647
Q8VBT0	Thioredoxin-related transmembrane protein 1	Tmx1	-0.362274805704754	0.476056426741439		0.777937	1.28545
Q9JLR9	HIG1 domain family member 1A, mitochondrial	Higd1a	-0.358273400200737	0.639888687114733		0.780098	1.28189
Q61553	Fascin	Fscn1	-0.358272552490234	3.9675172272438	+	0.780098	1.28189
Q80TR1	Latrophilin-1	Lphn1	-0.357806311713325	2.21044462760194	+	0.78035	1.28148
Q9D071	MMS19 nucleotide excision repair protein homolog	Mms19	-0.356387880113388	1.22525569362126		0.781118	1.28022
P62823	Ras-related protein Rab-3C	Rab3c	-0.356291241115994	4.08946272184989	+	0.78117	1.28013
Q91V64	Isochorismatase domain-containing protein 1	Isoc1	-0.355336295233833	1.85718197899848	+	0.781687	1.27928
Q9JKR6	Hypoxia up-regulated protein 1	Hyou1	-0.355223125881619	3.74122198368087	+	0.781749	1.27918
Q8VCX5	Calcium uptake protein 1, mitochondrial	Micu1	-0.354629940456814	0.704386136311138		0.78207	1.27866
P47964	60S ribosomal protein L36	Rpl36	-0.354382832845051	0.28412023015959		0.782204	1.27844
Q64362	AKT-interacting protein	Aktip	-0.353927188449436	0.798211005966671		0.782451	1.27803
Q8K2D3	Enhancer of mRNA-decapping protein 3	Edc3	-0.353261523776585	1.07983761514505		0.782812	1.27745
Q69ZH9	Rho GTPase-activating protein 23	Arhgap23	-0.352358924018009	1.81567545243948	+	0.783302	1.27665
Q61644	Protein kinase C and casein kinase substrate in neurons protein 1	Pacsin1	-0.351585600111221	3.12961771097821	+	0.783722	1.27596
Q3UUI3	Acyl-coenzyme A thioesterase THEM4	Them4	-0.348384857177734	1.25284462335545		0.785463	1.27313
Q9CQ40	39S ribosomal protein L49, mitochondrial	Mrpl49	-0.348093032836914	0.388391752798171		0.785622	1.27288
Q8C754	Vacuolar protein sorting-associated protein 52 homolog	Vps52	-0.346573935614689	1.57764722736993	+	0.78645	1.27154
Q9CXI5	Mesencephalic astrocyte-derived neurotrophic factor	Manf	-0.345270156860352	2.63183539311314	+	0.787161	1.27039
Q62048	Astrocytic phosphoprotein PEA-15	Pea15	-0.344760682847763	4.40236567675319	+	0.787439	1.26994
Q61337	Bcl2-associated agonist of cell death	Bad	-0.343885633680557	0.504004214749116		0.787916	1.26917
Q9D1F4	Proline-rich AKT1 substrate 1	Akt1s1	-0.342604319254558	1.32272555086821	+	0.788616	1.26804
Q9D7X8	Gamma-glutamylcyclotransferase	Ggct	-0.342072168986004	1.03907233117047		0.788907	1.26758
Q8BHE3	Caytaxin	Atcay	-0.339513142903645	1.92287506148848	+	0.790308	1.26533
Q9JKY5	Huntingtin-interacting protein 1-related protein	Hip1r	-0.337790171305336	1.25924103954079		0.791252	1.26382
O88935	Synapsin-1	Syn1	-0.337707095675999	2.56066424623005	+	0.791298	1.26375
Q99LS3	Phosphoserine phosphatase	Psph	-0.337245941162109	1.26143233266491		0.791551	1.26334
Q6A0A2	La-related protein 4B	Larp4b	-0.337149302164715	0.866883300632806		0.791604	1.26326
Q5DTL9	Sodium-driven chloride bicarbonate exchanger	Slc4a10	-0.336732864379883	2.2064903822237	+	0.791832	1.26289
P61148	Fibroblast growth factor 1	Fgf1	-0.336462868584526	0.81467339350911		0.791981	1.26266
O35551	Rab GTPase-binding effector protein 1	Rabep1	-0.336162355211048	2.09631482151732	+	0.792146	1.26239
Q9EQZ6	Rap guanine nucleotide exchange factor 4	Rapgef4	-0.33460807800293	0.432652500721476		0.793	1.26103
Q8VC88	Grancalcin	Gca	-0.331182479858398	1.00915319003307		0.794885	1.25804
Q2PFD7	PH and SEC7 domain-containing protein 3	Psd3	-0.330881118774414	1.96704021304061	+	0.795051	1.25778
Q9QX47	Protein SON	Son	-0.330590142144096	0.452756634594287		0.795211	1.25753
P17710	Hexokinase-1	Hk1	-0.330461290147568	3.19345249350541	+	0.795282	1.25742
Q9QXA5	U6 snRNA-associated Sm-like protein LSm4	Lsm4	-0.329625235663521	0.466309678326524		0.795743	1.25669
O08579	Emerin	Emd	-0.329614851209854	2.93018288526343	+	0.795749	1.25668
P97792	Coxsackievirus and adenovirus receptor homolog	Cxadr	-0.328909556070965	1.0159850479806		0.796138	1.25606
Q91ZM2	SH2B adapter protein 1	Sh2b1	-0.328856150309246	0.505071622549889		0.796167	1.25602
P45878	Peptidyl-prolyl cis-trans isomerase FKBP2	Fkbp2	-0.327306535508896	3.37012547440693	+	0.797023	1.25467
Q91Y86	Mitogen-activated protein kinase 8	Mapk8	-0.32683923509386	2.14317785618012	+	0.797281	1.25426
Q8K0C4	Lanosterol 14-alpha demethylase	Cyp51a1	-0.326591703626846	1.09385063026872		0.797418	1.25405
P42225	Signal transducer and activator of transcription 1	Stat1	-0.326541264851887	0.307577266536084		0.797446	1.254
Q810A7	ATP-dependent RNA helicase DDX42	Ddx42	-0.326513290405273	0.659911789510453		0.797461	1.25398
Q9ES56	Trafficking protein particle complex subunit 4	Trappc4	-0.326019499037002	0.636061304498744		0.797734	1.25355
Q9DCN2	NADH-cytochrome b5 reductase 3;NADH-cytochrome b5 reductase 3 membrane-bound form;NADH-cytochrome b5 reductase 3 soluble form	Cyb5r3	-0.325907601250542	3.62088219543046	+	0.797796	1.25345
Q9D8Y0	EF-hand domain-containing protein D2	Efhd2	-0.324938668145073	0.698732212134424		0.798332	1.25261
Q8VHQ9	Acyl-coenzyme A thioesterase 11	Acot11	-0.324848810831707	0.875990301821021		0.798382	1.25253
P60603	Reactive oxygen species modulator 1	Romo1	-0.324764887491863	1.94079361823854	+	0.798428	1.25246
Q9CQA1	Trafficking protein particle complex subunit 5	Trappc5	-0.32467714945475	1.35472922704164	+	0.798477	1.25238
Q3URE1	Acyl-CoA synthetase family member 3, mitochondrial	Acsf3	-0.324591742621529	0.55383801092403		0.798524	1.25231
P61924	Coatomer subunit zeta-1	Copz1	-0.32430140177409	1.01345871538409		0.798685	1.25206
Q99MS8	Tubulin polyglutamylase complex subunit 1	Tpgs1	-0.323608610365124	0.146452865700935		0.799069	1.25146
Q8VIM9	Immunity-related GTPase family Q protein	Irgq	-0.322816424899631	1.68243985989652	+	0.799508	1.25077
Q60823	RAC-beta serine/threonine-protein kinase	Akt2	-0.322219848632813	0.780415669110612		0.799838	1.25025
P20108	Thioredoxin-dependent peroxide reductase, mitochondrial	Prdx3	-0.322085062662762	5.63019258176052	+	0.799913	1.25014
O55023	Inositol monophosphatase 1	Impa1	-0.319149229261612	2.31855124018333	+	0.801542	1.24759
P97352	Protein S100-A13	S100a13	-0.319037331475151	0.667521596264448		0.801605	1.2475
Q8R2Y0	Monoacylglycerol lipase ABHD6	Abhd6	-0.318969514634873	1.48856741209456	+	0.801642	1.24744
Q69Z99	Zinc finger protein 512	Znf512	-0.318464067247181	0.532530097525858		0.801923	1.247
Q9QXB9	Developmentally-regulated GTP-binding protein 2	Drg2	-0.317690955268013	2.94909991366423	+	0.802353	1.24633
Q8C3F2	Constitutive coactivator of PPAR-gamma-like protein 2	Fam120c	-0.317210727267792	1.45716101126907	+	0.80262	1.24592
P46061	Ran GTPase-activating protein 1	Rangap1	-0.316974216037327	1.40173335141264	+	0.802752	1.24572
Q99LE6	ATP-binding cassette sub-family F member 2	Abcf2	-0.316753811306423	0.323420416446352		0.802874	1.24552
Q9CRD2	ER membrane protein complex subunit 2	Emc2	-0.316144731309677	0.537153937183475		0.803213	1.245
Q9D0T1	NHP2-like protein 1;NHP2-like protein 1, N-terminally processed	Nhp2l1	-0.316012488471138	0.639918807414194		0.803287	1.24489
P47708	Rabphilin-3A	Rph3a	-0.315728081597221	4.06229670015256	+	0.803445	1.24464
P10852	4F2 cell-surface antigen heavy chain	Slc3a2	-0.315612369113499	2.38825730620305	+	0.80351	1.24454
Q9D832	DnaJ homolog subfamily B member 4	Dnajb4	-0.315275404188366	3.20345021609369	+	0.803698	1.24425
Q8C129	Leucyl-cystinyl aminopeptidase	Lnpep	-0.314657211303711	0.847961303923896		0.804042	1.24372
P63024	Vesicle-associated membrane protein 3	Vamp3	-0.314130783081055	0.30122319271621		0.804335	1.24326
Q9JHR7	Insulin-degrading enzyme	Ide	-0.313931147257485	0.882288568419499		0.804447	1.24309
Q9D020	Cytosolic 5-nucleotidase 3A	Nt5c3a	-0.312629063924156	0.322896230874987		0.805173	1.24197
Q08091	Calponin-1	Cnn1	-0.312231699625652	0.423903036048154		0.805395	1.24163
Q8VHW2	Voltage-dependent calcium channel gamma-8 subunit	Cacng8	-0.311806996663414	1.50452576875625	+	0.805632	1.24126
Q62426	Cystatin-B	Cstb	-0.311648050944012	1.179647611721		0.805721	1.24112
O89116	Vesicle transport through interaction with t-SNAREs homolog 1A	Vti1a	-0.308951907687717	0.206195065545418		0.807228	1.23881
Q91YJ2	Sorting nexin-4	Snx4	-0.308874766031899	1.87579277382311	+	0.807271	1.23874
O08914	Fatty-acid amide hydrolase 1	Faah	-0.308830897013344	2.36681523411169	+	0.807296	1.2387
Q9ES97	Reticulon-3	Rtn3	-0.308412128024631	2.98628601146866	+	0.80753	1.23834
Q8CIP5	Protein dispatched homolog 2	Disp2	-0.308351304796009	0.343155326663524		0.807564	1.23829
Q9D0S9	Histidine triad nucleotide-binding protein 2, mitochondrial	Hint2	-0.308250851101345	2.70563720990511	+	0.80762	1.23821
P84084	ADP-ribosylation factor 5	Arf5	-0.30822139316135	4.1680426553261	+	0.807637	1.23818
Q6W8Q3	Purkinje cell protein 4-like protein 1	Pcp4l1	-0.307977464463974	0.766775381769694		0.807773	1.23797
Q8BTX9	Inactive hydroxysteroid dehydrogenase-like protein 1	Hsdl1	-0.306886672973633	2.17815847581871	+	0.808384	1.23704
Q4KMM3	Oxidation resistance protein 1	Oxr1	-0.306866539849175	3.84829368796654	+	0.808396	1.23702
A2APY7	NADH dehydrogenase [ubiquinone] 1 alpha subcomplex assembly factor 5	Ndufaf5	-0.306637446085613	1.66402192630069	+	0.808524	1.23682
Q3UN04	Ubiquitin carboxyl-terminal hydrolase 30	Usp30	-0.306613498263889	0.439216513996919		0.808537	1.2368
P81117	Nucleobindin-2;Nesfatin-1	Nucb2	-0.306239657931858	0.732864255492364		0.808747	1.23648
P15105	Glutamine synthetase	Glul	-0.304718017578125	1.97430130001626	+	0.8096	1.23518
Q9CPX8	Cytochrome b-c1 complex subunit 10	Uqcr11	-0.30342949761285	0.893428422496151		0.810324	1.23407
P47856	Glutamine--fructose-6-phosphate aminotransferase [isomerizing] 1	Gfpt1	-0.30300627814399	1.12154268625131		0.810562	1.23371
Q91XD7	Cysteine-rich with EGF-like domain protein 1	Creld1	-0.302944183349609	2.92800875589725	+	0.810596	1.23366
Q8VDH1	F-box only protein 21	Fbxo21	-0.301873736911347	1.18865565794414		0.811198	1.23274
Q3UHJ0	AP2-associated protein kinase 1	Aak1	-0.301516426934135	4.74521196423619	+	0.811399	1.23244
Q03173	Protein enabled homolog	Enah	-0.300853729248047	0.562858483530645		0.811772	1.23187
Q3UJD6	Ubiquitin carboxyl-terminal hydrolase 19	Usp19	-0.300853093465172	0.573407367841586		0.811772	1.23187
A3KMP2	Tetratricopeptide repeat protein 38	Ttc38	-0.300669776068794	0.748915960580528		0.811875	1.23172
Q6PGC1	ATP-dependent RNA helicase Dhx29	Dhx29	-0.300654305352104	0.883055941100014		0.811884	1.2317
Q80TI0	GRAM domain-containing protein 1B	Gramd1b	-0.300583521525066	0.381929653557543		0.811924	1.23164
Q9CY27	Very-long-chain enoyl-CoA reductase	Tecr	-0.29920154147678	3.1313161664832	+	0.812702	1.23046
Q8K0Q5	Rho GTPase-activating protein 18	Arhgap18	-0.298679775661892	0.707996230264283		0.812996	1.23002
P55066	Neurocan core protein	Ncan	-0.298350863986546	1.29318326647565		0.813181	1.22974
Q9EPJ9	ADP-ribosylation factor GTPase-activating protein 1	Arfgap1	-0.297954559326172	2.04018645387068	+	0.813405	1.2294
Q9R1K9	Centrin-2	Cetn2	-0.297496159871418	2.0748334084413	+	0.813663	1.22901
Q80XI4	Phosphatidylinositol 5-phosphate 4-kinase type-2 beta	Pip4k2b	-0.297400580512154	3.02443693928651	+	0.813717	1.22893
Q91YS8	Calcium/calmodulin-dependent protein kinase type 1	Camk1	-0.296535703870987	0.579714687397498		0.814205	1.22819
O35900	U6 snRNA-associated Sm-like protein LSm2	Lsm2	-0.29608556959364	0.375911050016715		0.814459	1.22781
Q9EPC1	Alpha-parvin	Parva	-0.295916451348198	0.657367875461778		0.814555	1.22766
Q811P8	Rho GTPase-activating protein 32	Arhgap32	-0.295570373535156	1.28774812760263		0.81475	1.22737
Q9DB34	Charged multivesicular body protein 2a	Chmp2a	-0.294549306233723	1.79827871845614	+	0.815327	1.2265
Q99NB8	Ubiquilin-4	Ubqln4	-0.294183519151474	0.269003592336749		0.815534	1.22619
Q3UHB1	5-nucleotidase domain-containing protein 3	Nt5dc3	-0.293867111206055	2.64942367480848	+	0.815713	1.22592
Q9QYX7	Protein piccolo	Pclo	-0.293720457288952	3.2965417315509	+	0.815796	1.2258
O55013	Trafficking protein particle complex subunit 3	Trappc3	-0.29364522298177	2.11033124322658	+	0.815838	1.22573
Q8VDP6	CDP-diacylglycerol--inositol 3-phosphatidyltransferase	Cdipt	-0.293234931098091	0.727789247716152		0.81607	1.22538
Q8BM72	Heat shock 70 kDa protein 13	Hspa13	-0.292509078979492	0.350376462162601		0.816481	1.22477
Q91Z67	SLIT-ROBO Rho GTPase-activating protein 2	Srgap2	-0.291346020168728	3.4895741958233	+	0.817139	1.22378
Q9CQU0	Thioredoxin domain-containing protein 12	Txndc12	-0.291271633572048	0.989661159952529		0.817181	1.22372
Q9CQN1	Heat shock protein 75 kDa, mitochondrial	Trap1	-0.291249805026585	4.09378486940169	+	0.817194	1.2237
Q9Z0R9	Fatty acid desaturase 2	Fads2	-0.290996339586044	1.14841141786387		0.817337	1.22348
Q9R062	Glycogenin-1	Gyg1	-0.290650261773003	1.38956612962862	+	0.817533	1.22319
Q9CXW3	Calcyclin-binding protein	Cacybp	-0.290554258558483	1.96004883925405	+	0.817588	1.22311
Q99P31	Hsp70-binding protein 1	Hspbp1	-0.29054069519043	1.29206632279943		0.817596	1.2231
P56391	Cytochrome c oxidase subunit 6B1	Cox6b1	-0.290363099839951	3.06878349789684	+	0.817696	1.22295
O35874	Neutral amino acid transporter A	Slc1a4	-0.289460076226128	2.49018076380079	+	0.818208	1.22218
Q6P2L7	Protein CASC4	Casc4	-0.289378060234917	0.331742713484142		0.818255	1.22211
Q9QYI3	DnaJ homolog subfamily C member 7	Dnajc7	-0.289207246568466	1.53700539725192	+	0.818352	1.22197
Q9QXX4	Calcium-binding mitochondrial carrier protein Aralar2	Slc25a13	-0.289201524522568	0.718363578967937		0.818355	1.22196
P51906	Excitatory amino acid transporter 3	Slc1a1	-0.288820054796005	1.50102358668378	+	0.818571	1.22164
Q64445	Cytochrome c oxidase subunit 8A, mitochondrial	Cox8a	-0.288653691609699	0.246458995277556		0.818666	1.2215
P97371	Proteasome activator complex subunit 1	Psme1	-0.288569344414604	1.95008837061041	+	0.818714	1.22143
P99027	60S acidic ribosomal protein P2	Rplp2	-0.288193808661568	3.03969143239819	+	0.818927	1.22111
O08601	Microsomal triglyceride transfer protein large subunit	Mttp	-0.288110521104603	0.303019394337811		0.818974	1.22104
P63085	Mitogen-activated protein kinase 1	Mapk1	-0.287991841634113	4.55743956690864	+	0.819041	1.22094
Q3UUQ7	GPI inositol-deacylase	Pgap1	-0.287176132202148	1.81820771571489	+	0.819505	1.22025
Q9D3A9	Protein tweety homolog 1	Ttyh1	-0.286984125773113	0.39261504621033		0.819614	1.22009
Q9D1H8	39S ribosomal protein L53, mitochondrial	Mrpl53	-0.285694758097328	0.893662667602736		0.820346	1.219
Q80X95	Ras-related GTP-binding protein A	Rraga	-0.285441504584416	1.41231189649037	+	0.82049	1.21878
O54941	SWI/SNF-related matrix-associated actin-dependent regulator of chromatin subfamily E member 1	Smarce1	-0.284261067708332	0.482577576849086		0.821162	1.21779
Q9ER58	Testican-2	Spock2	-0.28387345208062	0.513782449345627		0.821383	1.21746
P32921	Tryptophan--tRNA ligase, cytoplasmic;T1-TrpRS;T2-TrpRS	Wars	-0.283155865139431	3.467913204667	+	0.821791	1.21685
Q61576	Peptidyl-prolyl cis-trans isomerase FKBP10	Fkbp10	-0.282920413547092	0.802849828180319		0.821926	1.21666
Q80XK6	Autophagy-related protein 2 homolog B	Atg2b	-0.282388687133789	0.961250484356957		0.822229	1.21621
Q5SSH7	Zinc finger ZZ-type and EF-hand domain-containing protein 1	Zzef1	-0.282162348429363	0.704481195464378		0.822358	1.21602
P24369	Peptidyl-prolyl cis-trans isomerase B	Ppib	-0.281881756252712	4.05931083389782	+	0.822517	1.21578
Q9EPW0	Type I inositol 3,4-bisphosphate 4-phosphatase	Inpp4a	-0.281708823310005	1.8233690451817	+	0.822616	1.21563
Q80UU9	Membrane-associated progesterone receptor component 2	Pgrmc2	-0.280910915798611	2.05854322790015	+	0.823071	1.21496
Q812A2	SLIT-ROBO Rho GTPase-activating protein 3	Srgap3	-0.280182732476128	1.06009762853033		0.823487	1.21435
O35658	Complement component 1 Q subcomponent-binding protein, mitochondrial	C1qbp	-0.279881583319771	2.12549489896185	+	0.823659	1.2141
Q9JL56	Glycerophosphodiester phosphodiesterase 1	Gde1	-0.279386520385742	1.24869094571931		0.823941	1.21368
Q6PAK3	Protein arginine N-methyltransferase 8	Prmt8	-0.279177771674263	3.04123889062907	+	0.824061	1.2135
Q61699	Heat shock protein 105 kDa	Hsph1	-0.278899510701496	2.6076344933447	+	0.824219	1.21327
Q8BL66	Early endosome antigen 1	Eea1	-0.278796090020073	0.896831305969292		0.824279	1.21318
Q8R5H6	Wiskott-Aldrich syndrome protein family member 1	Wasf1	-0.278702206081814	2.40094710872223	+	0.824332	1.2131
P62862	40S ribosomal protein S30	Fau	-0.278042263454861	1.18531771080691		0.824709	1.21255
Q9D0R8	Protein LSM12 homolog	Lsm12	-0.277651892768013	0.318532070914009		0.824933	1.21222
Q921M4	Golgin subfamily A member 2	Golga2	-0.277058919270832	1.57248035842114	+	0.825272	1.21172
Q9JKL4	NADH dehydrogenase [ubiquinone] 1 alpha subcomplex assembly factor 3	Ndufaf3	-0.275498708089192	0.346273826176478		0.826165	1.21041
Q9CPT4	Myeloid-derived growth factor	Mydgf	-0.275429831610786	1.70512510164914	+	0.826204	1.21035
Q64282	Interferon-induced protein with tetratricopeptide repeats 1	Ifit1	-0.274952994452583	1.3706194731877	+	0.826477	1.20995
Q8BLJ3	PI-PLC X domain-containing protein 3	Plcxd3	-0.274884329901802	0.785103024076883		0.826517	1.2099
Q9D7N3	28S ribosomal protein S9, mitochondrial	Mrps9	-0.274878819783527	1.94760906923972	+	0.82652	1.20989
Q61735	Leukocyte surface antigen CD47	Cd47	-0.273908403184681	2.04522472041475	+	0.827076	1.20908
Q9D061	Acyl-CoA-binding domain-containing protein 6	Acbd6	-0.273093329535591	0.26601392876604		0.827543	1.2084
Q60625	Intercellular adhesion molecule 5	Icam5	-0.273021697998047	1.73505448750188	+	0.827584	1.20834
Q99KR3	Beta-lactamase-like protein 2	Lactb2	-0.272608015272354	0.224754326967693		0.827822	1.20799
P56399	Ubiquitin carboxyl-terminal hydrolase 5	Usp5	-0.272254731920029	3.92063567210292	+	0.828024	1.20769
P63073	Eukaryotic translation initiation factor 4E	Eif4e	-0.272163814968533	1.95790636992532	+	0.828077	1.20762
P60840	Alpha-endosulfine	Ensa	-0.271695454915363	2.0897206603934	+	0.828346	1.20723
Q9CRC0	Vitamin K epoxide reductase complex subunit 1	Vkorc1	-0.27018716600206	0.234731850073118		0.829212	1.20596
Q8BKZ9	Pyruvate dehydrogenase protein X component, mitochondrial	Pdhx	-0.269959555731877	2.20338170313255	+	0.829343	1.20577
P40936	Indolethylamine N-methyltransferase	Inmt	-0.269725375705296	0.19736288802307		0.829477	1.20558
P62257	Ubiquitin-conjugating enzyme E2 H	Ube2h	-0.268178304036461	0.279768681812841		0.830367	1.20429
Q8R2U0	Nucleoporin SEH1	Seh1l	-0.268032921685112	0.495521710264551		0.830451	1.20416
Q91V09	WD repeat-containing protein 13	Wdr13	-0.267856597900391	2.32679190983407	+	0.830553	1.20402
Q3UM45	Protein phosphatase 1 regulatory subunit 7	Ppp1r7	-0.267491658528645	2.45875117143543	+	0.830763	1.20371
Q6P5F7	Protein tweety homolog 3	Ttyh3	-0.267325083414715	1.08052090594816		0.830859	1.20357
G3X9K3	Brefeldin A-inhibited guanine nucleotide-exchange protein 1	Arfgef1	-0.266990661621094	0.950865763805707		0.831051	1.2033
Q9D125	28S ribosomal protein S25, mitochondrial	Mrps25	-0.266977734035915	1.48308850573004	+	0.831059	1.20328
P97333	Neuropilin-1	Nrp1	-0.266485850016277	1.18786616475626		0.831342	1.20287
Q6IRU5	Clathrin light chain B	Cltb	-0.266352971394856	2.05183973919882	+	0.831419	1.20276
P14211	Calreticulin	Calr	-0.265527301364475	4.42128446173513	+	0.831895	1.20208
Q91W61	F-box/LRR-repeat protein 15	Fbxl15	-0.263071484035919	0.677420086323229		0.833312	1.20003
P48320	Glutamate decarboxylase 2	Gad2	-0.262894948323567	3.73454614967574	+	0.833414	1.19988
Q9WTI7	Unconventional myosin-Ic	Myo1c	-0.262790468004017	0.81644910643681		0.833474	1.1998
Q9CRA7	ATP synthase subunit s, mitochondrial	Atp5s	-0.262481477525501	0.820208541579023		0.833653	1.19954
Q60870	Receptor expression-enhancing protein 5	Reep5	-0.262127346462673	0.218260803706602		0.833857	1.19925
Q80UK7	Spindle assembly abnormal protein 6 homolog	Sass6	-0.262119505140515	0.29978620174037		0.833862	1.19924
Q8BYK6	YTH domain-containing family protein 3	Ythdf3	-0.261521657307942	1.9558008937292	+	0.834208	1.19874
Q62425	Cytochrome c oxidase subunit NDUFA4	Ndufa4	-0.261210759480797	2.18208589406196	+	0.834387	1.19848
Q8C7R4	Ubiquitin-like modifier-activating enzyme 6	Uba6	-0.261132346259224	0.732848064401928		0.834433	1.19842
P28658	Ataxin-10	Atxn10	-0.261088901095921	3.43124700209244	+	0.834458	1.19838
P29533	Vascular cell adhesion protein 1	Vcam1	-0.260163625081379	0.610575356142155		0.834993	1.19761
Q9EQF6	Dihydropyrimidinase-related protein 5	Dpysl5	-0.25962087843153	1.07871387379487		0.835307	1.19716
Q9JLM8	Serine/threonine-protein kinase DCLK1	Dclk1	-0.259512795342339	1.8960715803866	+	0.83537	1.19707
Q9QZ08	N-acetyl-D-glucosamine kinase	Nagk	-0.259361055162216	1.18713043186614		0.835458	1.19695
Q8BLY2	Probable threonine--tRNA ligase 2, cytoplasmic	Tarsl2	-0.258735868665909	1.37103690534498	+	0.83582	1.19643
P50096	Inosine-5-monophosphate dehydrogenase 1	Impdh1	-0.258605533175999	0.614210166352273		0.835895	1.19632
Q9D1T0	Leucine-rich repeat and immunoglobulin-like domain-containing nogo receptor-interacting protein 1	Lingo1	-0.257789823744034	0.90356660254015		0.836368	1.19565
P31648	Sodium- and chloride-dependent GABA transporter 1	Slc6a1	-0.257603327433269	2.40894451877862	+	0.836476	1.19549
P70362	Ubiquitin fusion degradation protein 1 homolog	Ufd1l	-0.256953557332356	0.280640269903812		0.836853	1.19495
Q8VDJ3	Vigilin	Hdlbp	-0.256618287828235	4.03736241082149	+	0.837048	1.19468
P10107	Annexin A1	Anxa1	-0.256020228068031	0.325322611134674		0.837395	1.19418
Q9Z2I2	Peptidyl-prolyl cis-trans isomerase FKBP1B	Fkbp1b	-0.255638758341473	0.373538190506076		0.837616	1.19386
Q80WC7	Arf-GAP domain and FG repeat-containing protein 2	Agfg2	-0.255241394042969	1.00795068158104		0.837847	1.19354
Q9JME5	AP-3 complex subunit beta-2	Ap3b2	-0.25518480936686	3.31969703245525	+	0.83788	1.19349
Q64337	Sequestosome-1	Sqstm1	-0.254784901936848	2.54630617425298	+	0.838112	1.19316
Q9ERS2	NADH dehydrogenase [ubiquinone] 1 alpha subcomplex subunit 13	Ndufa13	-0.254405551486546	1.1469475299568		0.838332	1.19284
Q810B6	Rabankyrin-5	Ankfy1	-0.253939946492512	1.01608021305608		0.838603	1.19246
P62960	Nuclease-sensitive element-binding protein 1	Ybx1	-0.253860897488064	2.11379693949583	+	0.838649	1.19239
Q60780	Growth arrest-specific protein 7	Gas7	-0.253282970852322	1.40699960668676	+	0.838985	1.19192
O70503	Very-long-chain 3-oxoacyl-CoA reductase	Hsd17b12	-0.253271950615776	3.22197968662161	+	0.838991	1.19191
Q99JY8	Lipid phosphate phosphohydrolase 3	Ppap2b	-0.253260294596355	0.21677089042219		0.838998	1.1919
Q9CWE0	Mitochondrial fission regulator 1-like	Mtfr1l	-0.253173616197373	0.868719218589428		0.839049	1.19183
Q9CPQ8	ATP synthase subunit g, mitochondrial	Atp5l	-0.253072526719833	1.20596107512935		0.839107	1.19174
Q8BYP3	Rho-related GTP-binding protein RhoF	Rhof	-0.252975040011936	0.36293202370644		0.839164	1.19166
Q8VD33	Small glutamine-rich tetratricopeptide repeat-containing protein beta	Sgtb	-0.252283308241104	0.547077772826693		0.839567	1.19109
P48771	Cytochrome c oxidase subunit 7A2, mitochondrial	Cox7a2	-0.252053154839409	1.34401003525442	+	0.839701	1.1909
O70579	Peroxisomal membrane protein PMP34	Slc25a17	-0.251981523301865	0.326934767366444		0.839742	1.19084
Q68FD9	UPF0606 protein KIAA1549	Kiaa1549	-0.251971774631073	0.511623253416274		0.839748	1.19083
Q61191	Host cell factor 1;HCF N-terminal chain 1;HCF N-terminal chain 2;HCF N-terminal chain 3;HCF N-terminal chain 4;HCF N-terminal chain 5;HCF N-terminal chain 6;HCF C-terminal chain 1;HCF C-terminal chain 2;HCF C-terminal chain 3;HCF C-terminal chain 4;HCF C-terminal chain 5;HCF C-terminal chain 6	Hcfc1	-0.251717461480034	0.358205012895681		0.839896	1.19062
P08030	Adenine phosphoribosyltransferase	Aprt	-0.251193576388889	1.37145185659496	+	0.840201	1.19019
Q61627	Glutamate receptor ionotropic, delta-1	Grid1	-0.250825246175129	0.650957273006091		0.840416	1.18989
Q8K2Y7	39S ribosomal protein L47, mitochondrial	Mrpl47	-0.250309838189018	0.333350146502289		0.840716	1.18946
Q8C1B1	Calmodulin-regulated spectrin-associated protein 2	Camsap2	-0.249957402547203	0.577050427603219		0.840921	1.18917
Q3UGY8	Brefeldin A-inhibited guanine nucleotide-exchange protein 3	Arfgef3	-0.249756283230251	2.01264615598395	+	0.841038	1.18901
Q08460	Calcium-activated potassium channel subunit alpha-1	Kcnma1	-0.249715805053711	0.971777395250844		0.841062	1.18897
Q9CQH7	Transcription factor BTF3 homolog 4	Btf3l4	-0.248478995429146	1.14225000574353		0.841783	1.18795
Q05512	Serine/threonine-protein kinase MARK2	Mark2	-0.248441484239368	0.271847763427146		0.841805	1.18792
O35678	Monoglyceride lipase	Mgll	-0.247915479871963	1.80370648480635	+	0.842112	1.18749
P46737	Lys-63-specific deubiquitinase BRCC36	Brcc3	-0.247065862019856	0.595544671718858		0.842608	1.18679
P42859	Huntingtin	Htt	-0.246807310316296	1.07226770443268		0.842759	1.18658
Q9WVA4	Transgelin-2	Tagln2	-0.246795442369251	1.07887935757707		0.842766	1.18657
P62900	60S ribosomal protein L31	Rpl31	-0.246438132392033	2.55194296440563	+	0.842975	1.18627
Q4VAE3	Transmembrane protein 65	Tmem65	-0.246373494466145	0.556593862359666		0.843013	1.18622
Q3UGS4	Protein FAM195B	Fam195b	-0.245911916097008	1.83110539668045	+	0.843283	1.18584
Q9Z0H8	CAP-Gly domain-containing linker protein 2	Clip2	-0.245236502753365	1.99425559106665	+	0.843677	1.18529
Q3TCJ1	BRISC complex subunit Abro1	Fam175b	-0.245233959621853	0.0994019489996918		0.843679	1.18528
P38060	Hydroxymethylglutaryl-CoA lyase, mitochondrial	Hmgcl	-0.243400573730469	1.27969496157257		0.844752	1.18378
Q9QZ06	Toll-interacting protein	Tollip	-0.242859310574001	2.25126727112265	+	0.845069	1.18334
Q9WUQ2	Prolactin regulatory element-binding protein	Preb	-0.24285676744249	0.405308984978247		0.84507	1.18333
P16388;P16390	Potassium voltage-gated channel subfamily A member 1;Potassium voltage-gated channel subfamily A member 3	Kcna1;Kcna3	-0.242288165622288	0.273115823183187		0.845403	1.18287
Q921J2	GTP-binding protein Rheb	Rheb	-0.242170545789929	0.887808960041449		0.845472	1.18277
O09111	NADH dehydrogenase [ubiquinone] 1 beta subcomplex subunit 11, mitochondrial	Ndufb11	-0.241805818345814	1.95233509715755	+	0.845686	1.18247
Q8BWG8	Beta-arrestin-1	Arrb1	-0.241653442382813	0.487729910016265		0.845775	1.18235
P00405	Cytochrome c oxidase subunit 2	Mtco2	-0.241636912027996	1.78177444728038	+	0.845785	1.18233
A2A5R2	Brefeldin A-inhibited guanine nucleotide-exchange protein 2	Arfgef2	-0.240502675374351	2.10591784852949	+	0.84645	1.1814
P10637	Microtubule-associated protein tau	Mapt	-0.240438885158966	1.1956717776298		0.846488	1.18135
Q9DCT8	Cysteine-rich protein 2	Crip2	-0.239931318495007	1.61477325837921	+	0.846786	1.18094
Q9CZX8	40S ribosomal protein S19	Rps19	-0.239152696397568	2.55597447376988	+	0.847243	1.1803
O08539	Myc box-dependent-interacting protein 1	Bin1	-0.238560994466145	2.22380017032823	+	0.84759	1.17982
Q9JIA7	Sphingosine kinase 2	Sphk2	-0.238091150919598	0.509419603258868		0.847866	1.17943
Q9JK48	Endophilin-B1	Sh3glb1	-0.237930085923935	1.02480658923694		0.847961	1.1793
P70697	Uroporphyrinogen decarboxylase	Urod	-0.237896601359051	0.239465745351891		0.847981	1.17927
O88384	Vesicle transport through interaction with t-SNAREs homolog 1B	Vti1b	-0.237577438354492	1.32646211248293	+	0.848168	1.17901
Q8R180	ERO1-like protein alpha	Ero1l	-0.237538231743706	0.612047005554564		0.848191	1.17898
O70311	Glycylpeptide N-tetradecanoyltransferase 2	Nmt2	-0.236253526475693	1.50588335084817	+	0.848947	1.17793
Q8CJ67	Double-stranded RNA-binding protein Staufen homolog 2	Stau2	-0.236244625515408	0.220449674524591		0.848952	1.17792
Q9JI91	Alpha-actinin-2	Actn2	-0.235888163248699	0.204526823707994		0.849162	1.17763
Q8BMF4	Dihydrolipoyllysine-residue acetyltransferase component of pyruvate dehydrogenase complex, mitochondrial	Dlat	-0.235644658406578	3.13527867637598	+	0.849305	1.17743
P14231	Sodium/potassium-transporting ATPase subunit beta-2	Atp1b2	-0.235531065199112	1.65049717137713	+	0.849372	1.17734
O35640	Annexin A8	Anxa8	-0.235406027899849	0.346836139282081		0.849446	1.17724
Q07079	Insulin-like growth factor-binding protein 5	Igfbp5	-0.235123104519314	0.351764850560977		0.849612	1.17701
Q8C0D5	Elongation factor Tu GTP-binding domain-containing protein 1	Eftud1	-0.234499825371635	0.342775038886495		0.84998	1.1765
Q9R0Q9	Mannose-P-dolichol utilization defect 1 protein	Mpdu1	-0.233093685574005	1.39478141376252	+	0.850808	1.17535
P13020	Gelsolin	Gsn	-0.232780032687717	0.409187650151794		0.850993	1.1751
Q3UU96	Serine/threonine-protein kinase MRCK alpha	Cdc42bpa	-0.232168621487087	0.219697244571202		0.851354	1.1746
Q80UM7	Mannosyl-oligosaccharide glucosidase	Mogs	-0.231835259331596	2.14894516201432	+	0.851551	1.17433
Q3UVX5	Metabotropic glutamate receptor 5	Grm5	-0.231425179375542	0.553062355199346		0.851793	1.17399
P19536	Cytochrome c oxidase subunit 5B, mitochondrial	Cox5b	-0.231377495659721	3.59152512583645	+	0.851821	1.17396
Q8BG92	Clavesin-2	Clvs2	-0.23102527194553	0.446085691788663		0.852029	1.17367
Q8CC88	von Willebrand factor A domain-containing protein 8	Vwa8	-0.230843438042534	0.205255482476867		0.852137	1.17352
Q9JIK5	Nucleolar RNA helicase 2	Ddx21	-0.230725394354927	0.348065219486131		0.852206	1.17342
Q9JIS5	Synaptic vesicle glycoprotein 2A	Sv2a	-0.230407502916126	4.28695164693905	+	0.852394	1.17317
Q9Z0P4	Paralemmin-1	Palm	-0.22985013326009	2.30177252612267	+	0.852723	1.17271
P35564	Calnexin	Canx	-0.229242748684353	3.26505968174009	+	0.853083	1.17222
Q9CX30	Protein YIF1B	Yif1b	-0.228012508816189	0.415651306740205		0.85381	1.17122
Q8K4X7	1-acyl-sn-glycerol-3-phosphate acyltransferase delta	Agpat4	-0.227998945448135	1.91628945131935	+	0.853818	1.17121
P47199	Quinone oxidoreductase	Cryz	-0.227924982706703	0.672479946322471		0.853862	1.17115
P0DN34			-0.227729161580402	1.20440952149636		0.853978	1.17099
P70460	Vasodilator-stimulated phosphoprotein	Vasp	-0.227719836764866	1.21195586025197		0.853984	1.17098
Q7TQD2	Tubulin polymerization-promoting protein	Tppp	-0.227500703599716	1.18643708252955		0.854113	1.1708
Q9CZJ2	Heat shock 70 kDa protein 12B	Hspa12b	-0.227315690782333	0.793296889606712		0.854223	1.17065
Q9D0F3	Protein ERGIC-53	Lman1	-0.224362267388237	0.74184847122709		0.855973	1.16826
Q9WVL0	Maleylacetoacetate isomerase	Gstz1	-0.224175771077476	0.53443908732472		0.856084	1.16811
Q811S7	Upstream-binding protein 1	Ubp1	-0.22383647494846	0.20006408256113		0.856285	1.16784
Q7TMF3	NADH dehydrogenase [ubiquinone] 1 alpha subcomplex subunit 12	Ndufa12	-0.223751280042862	1.98557459591137	+	0.856336	1.16777
Q9D1H6	NADH dehydrogenase [ubiquinone] 1 alpha subcomplex assembly factor 4	Ndufaf4	-0.222792307535808	1.05281527443426		0.856905	1.16699
Q5U3K5	Rab-like protein 6	Rabl6	-0.222588433159721	1.51315242300857	+	0.857026	1.16683
Q8BGR6	ADP-ribosylation factor-like protein 15	Arl15	-0.222346199883354	0.326711904049931		0.85717	1.16663
P22682	E3 ubiquitin-protein ligase CBL	Cbl	-0.221889495849609	0.46480835848926		0.857442	1.16626
Q7TSJ2	Microtubule-associated protein 6	Map6	-0.221622043185764	1.00629688691055		0.857601	1.16604
A2AGL3	Ryanodine receptor 3	Ryr3	-0.221310721503365	0.2490928798858		0.857786	1.16579
Q9CXU9	Eukaryotic translation initiation factor 1b	Eif1b	-0.22086461385091	0.185996887990303		0.858051	1.16543
Q9WTT4	V-type proton ATPase subunit G 2	Atp6v1g2	-0.220705668131512	1.26737987527914		0.858146	1.1653
P19783	Cytochrome c oxidase subunit 4 isoform 1, mitochondrial	Cox4i1	-0.220653745863171	2.0819905866608	+	0.858176	1.16526
Q99M87	DnaJ homolog subfamily A member 3, mitochondrial	Dnaja3	-0.22034200032552	0.742363107594466		0.858362	1.16501
P61358	60S ribosomal protein L27	Rpl27	-0.219971550835506	1.47604400266112	+	0.858582	1.16471
P07356	Annexin A2	Anxa2	-0.219826592339412	0.449610070799966		0.858669	1.16459
Q9D8V7	Signal peptidase complex catalytic subunit SEC11C	Sec11c	-0.219741609361439	0.383315712428668		0.858719	1.16452
Q3V0C5	Ubiquitin carboxyl-terminal hydrolase 48	Usp48	-0.219734615749783	0.387009886740475		0.858723	1.16452
Q8C570	mRNA export factor	Rae1	-0.219526714748806	0.247328768983004		0.858847	1.16435
Q9DD18	D-tyrosyl-tRNA(Tyr) deacylase 1	Dtd1	-0.219395531548397	1.13584764642808		0.858925	1.16425
Q6PB66	Leucine-rich PPR motif-containing protein, mitochondrial	Lrpprc	-0.219256507025825	3.60730768263318	+	0.859008	1.16413
Q62432;Q8BUN5;Q9JIW5	Mothers against decapentaplegic homolog 2;Mothers against decapentaplegic homolog 3;Mothers against decapentaplegic homolog 9	Smad2;Smad3;Smad9	-0.219249937269421	0.154019840783675		0.859012	1.16413
Q9D1D4	Transmembrane emp24 domain-containing protein 10	Tmed10	-0.218774371676975	2.27768501135074	+	0.859295	1.16374
O70566	Protein diaphanous homolog 2	Diaph2	-0.218577490912544	0.646065361757706		0.859412	1.16359
Q8BVF2	Phosducin-like protein 3	Pdcl3	-0.217540529039169	1.29084403701964		0.86003	1.16275
P12960	Contactin-1	Cntn1	-0.217098236083984	0.907584481154298		0.860294	1.16239
Q3UHC7	Disabled homolog 2-interacting protein	Dab2ip	-0.217094633314343	0.811125369695555		0.860296	1.16239
Q8WTY4	Anamorsin	Ciapin1	-0.217035293579102	1.35873261514862	+	0.860332	1.16234
Q8R3Q2	Serine/threonine-protein phosphatase 6 regulatory subunit 2	Ppp6r2	-0.216364330715603	0.515177710139816		0.860732	1.1618
O88668	Protein CREG1	Creg1	-0.215843200683594	0.478643404992951		0.861043	1.16138
Q9CQR2	40S ribosomal protein S21	Rps21	-0.21582137213813	1.73322503378826	+	0.861056	1.16136
Q99PL5	Ribosome-binding protein 1	Rrbp1	-0.214114295111763	1.73129064973797	+	0.862075	1.15999
P61963	DDB1- and CUL4-associated factor 7	Dcaf7	-0.213532765706379	0.344777495753862		0.862423	1.15952
Q9CRY7	Glycerophosphodiester phosphodiesterase domain-containing protein 1	Gdpd1	-0.213531494140625	1.5606230674142	+	0.862424	1.15952
P07091	Protein S100-A4	S100a4	-0.213187111748589	0.429887503144101		0.862629	1.15925
Q9EPR5	VPS10 domain-containing receptor SorCS2	Sorcs2	-0.212649451361763	1.21864925405613		0.862951	1.15881
E9Q7G0		Numa1	-0.212435828314884	0.279229389753068		0.863079	1.15864
Q99KR7	Peptidyl-prolyl cis-trans isomerase F, mitochondrial	Ppif	-0.211950514051647	0.790894595654721		0.863369	1.15825
Q920P3	BMP/retinoic acid-inducible neural-specific protein 1	Brinp1	-0.211867226494682	0.324810544464981		0.863419	1.15819
Q91XF0	Pyridoxine-5-phosphate oxidase	Pnpo	-0.211839887830948	0.844002154903048		0.863435	1.15816
O35682	Myeloid-associated differentiation marker	Myadm	-0.211586422390411	0.282873926190848		0.863587	1.15796
Q80YX1	Tenascin	Tnc	-0.211024390326607	0.451586679534284		0.863924	1.15751
P61514	60S ribosomal protein L37a	Rpl37a	-0.21099853515625	1.01262970299899		0.863939	1.15749
P57722	Poly(rC)-binding protein 3	Pcbp3	-0.210902531941734	1.51400657952305	+	0.863997	1.15741
Q8K2M0	39S ribosomal protein L38, mitochondrial	Mrpl38	-0.210323121812607	1.18826744735492		0.864344	1.15695
Q9CR98	Protein FAM136A	Fam136a	-0.20983780754937	0.265774388788086		0.864634	1.15656
Q8CHT0	Delta-1-pyrroline-5-carboxylate dehydrogenase, mitochondrial	Aldh4a1	-0.20983166164822	1.88243138534946	+	0.864638	1.15655
P60867	40S ribosomal protein S20	Rps20	-0.209485159979927	1.16073341581331		0.864846	1.15628
P63034;Q9QX11;O08967	Cytohesin-2;Cytohesin-1;Cytohesin-3	Cyth2;Cyth1;Cyth3	-0.209424548678928	0.654063009283261		0.864882	1.15623
Q8BJZ4	28S ribosomal protein S35, mitochondrial	Mrps35	-0.209081013997395	0.231186299789187		0.865088	1.15595
P20357	Microtubule-associated protein 2	Map2	-0.208989037407768	2.90511348507777	+	0.865143	1.15588
Q925T6	Glutamate receptor-interacting protein 1	Grip1	-0.208756764729817	0.499469138965475		0.865283	1.15569
Q9CQW1	Synaptobrevin homolog YKT6	Ykt6	-0.208689583672417	0.887073093263976		0.865323	1.15564
Q02819	Nucleobindin-1	Nucb1	-0.208156797620987	3.34286948786765	+	0.865642	1.15521
Q9QUH0	Glutaredoxin-1	Glrx	-0.207800971137154	1.38980266057756	+	0.865856	1.15493
P21278	Guanine nucleotide-binding protein subunit alpha-11	Gna11	-0.207732942369248	1.74985182694074	+	0.865897	1.15487
O08915	AH receptor-interacting protein	Aip	-0.207655588785808	0.838300579411539		0.865943	1.15481
Q62433	Protein NDRG1	Ndrg1	-0.207603242662216	0.970123977390938		0.865975	1.15477
Q8K0D0	Cyclin-dependent kinase 17	Cdk17	-0.207474178738064	0.702506644777133		0.866052	1.15466
Q71M36	Chondroitin sulfate proteoglycan 5	Cspg5	-0.20742522345649	1.45809957912145	+	0.866082	1.15463
Q9Z1M8	Protein Red	Ik	-0.206817626953125	0.436847079790132		0.866446	1.15414
Q9Z2H2	Regulator of G-protein signaling 6	Rgs6	-0.206511391533745	0.29898470465616		0.86663	1.15389
P17918	Proliferating cell nuclear antigen	Pcna	-0.205912907918297	0.238833553915915		0.86699	1.15342
P35821	Tyrosine-protein phosphatase non-receptor type 1	Ptpn1	-0.205400678846569	1.62801631057986	+	0.867298	1.15301
Q9DBE8	Alpha-1,3/1,6-mannosyltransferase ALG2	Alg2	-0.205318239000107	1.95595559214081	+	0.867347	1.15294
Q9DC70	NADH dehydrogenase [ubiquinone] iron-sulfur protein 7, mitochondrial	Ndufs7	-0.204987843831379	1.51409483421727	+	0.867546	1.15268
Q78XF5	Oligosaccharyltransferase complex subunit OSTC	Ostc	-0.2049683464898	1.10348547118423		0.867558	1.15266
Q60715	Prolyl 4-hydroxylase subunit alpha-1	P4ha1	-0.204677157931858	0.605406805620235		0.867733	1.15243
Q3UHK6	Teneurin-4	Tenm4	-0.204520119561092	0.31240708925003		0.867827	1.1523
Q9R1V4	Disintegrin and metalloproteinase domain-containing protein 11	Adam11	-0.204412248399521	0.189002288504222		0.867892	1.15222
Q8R0S4	Voltage-dependent L-type calcium channel subunit beta-4	Cacnb4	-0.20413377549913	0.309586334344007		0.86806	1.15199
P97372	Proteasome activator complex subunit 2	Psme2	-0.203533172607422	0.939727477758058		0.868421	1.15151
Q9WVK4	EH domain-containing protein 1	Ehd1	-0.203473832872181	1.8327957981142	+	0.868457	1.15147
Q9Z2I9	Succinyl-CoA ligase [ADP-forming] subunit beta, mitochondrial	Sucla2	-0.203212738037109	5.31424488259441	+	0.868614	1.15126
O88737	Protein bassoon	Bsn	-0.201900694105358	2.15327366997606	+	0.869404	1.15021
Q00915	Retinol-binding protein 1	Rbp1	-0.201805326673718	0.658585502905037		0.869462	1.15014
Q9QZB9	Dynactin subunit 5	Dctn5	-0.201598697238499	1.0745012675193		0.869586	1.14997
Q8JZN7	Mitochondrial Rho GTPase 2	Rhot2	-0.201240539550781	0.3072005026418		0.869802	1.14969
P50114	Protein S100-B	S100b	-0.201019922892254	0.321212033976182		0.869935	1.14951
P41241	Tyrosine-protein kinase CSK	Csk	-0.200710084703235	0.409490750405871		0.870122	1.14926
P62301	40S ribosomal protein S13	Rps13	-0.1999634636773	3.06166552779138	+	0.870573	1.14867
Q9DBS5	Kinesin light chain 4	Klc4	-0.199625227186413	0.375089224908678		0.870777	1.1484
Q791T5	Mitochondrial carrier homolog 1	Mtch1	-0.198530197143555	1.51650092415704	+	0.871438	1.14753
P12787	Cytochrome c oxidase subunit 5A, mitochondrial	Cox5a	-0.198240280151367	2.11392061359949	+	0.871613	1.1473
O54774	AP-3 complex subunit delta-1	Ap3d1	-0.198113335503471	2.09880034443917	+	0.87169	1.1472
Q9JMA1	Ubiquitin carboxyl-terminal hydrolase 14	Usp14	-0.198098076714409	2.09034624910455	+	0.871699	1.14719
Q5PR73	GTP-binding protein Di-Ras2	Diras2	-0.197900348239475	1.97827292491677	+	0.871818	1.14703
Q3TCN2	Putative phospholipase B-like 2;Putative phospholipase B-like 2 28 kDa form;Putative phospholipase B-like 2 40 kDa form;Putative phospholipase B-like 2 15 kDa form	Plbd2	-0.197885089450413	0.669224966433855		0.871828	1.14702
Q9QUJ7	Long-chain-fatty-acid--CoA ligase 4	Acsl4	-0.197791629367405	0.864057176243879		0.871884	1.14694
P63005	Platelet-activating factor acetylhydrolase IB subunit alpha	Pafah1b1	-0.197368621826172	3.2759952314439	+	0.87214	1.14661
O08709	Peroxiredoxin-6	Prdx6	-0.197166442871094	0.484631820143512		0.872262	1.14644
Q9Z2Y3	Homer protein homolog 1	Homer1	-0.197147157457138	1.41859138035151	+	0.872274	1.14643
Q9CWM4	Prefoldin subunit 1	Pfdn1	-0.197049882676868	0.917007837098357		0.872333	1.14635
Q6PDS3	Sterile alpha and TIR motif-containing protein 1	Sarm1	-0.197028901841907	0.970200959677346		0.872345	1.14634
P17809	Solute carrier family 2, facilitated glucose transporter member 1	Slc2a1	-0.196982489691841	0.309653817550478		0.872373	1.1463
Q8R5J9	PRA1 family protein 3	Arl6ip5	-0.196951548258465	2.38288555683761	+	0.872392	1.14627
Q9Z1R2	Large proline-rich protein BAG6	Bag6	-0.195579528808594	2.74324285130341	+	0.873222	1.14518
P41731	CD63 antigen	Cd63	-0.195313347710503	0.172207623266411		0.873383	1.14497
P52479	Ubiquitin carboxyl-terminal hydrolase 10	Usp10	-0.195195939805771	0.239216289431501		0.873454	1.14488
Q9CYH2	Redox-regulatory protein FAM213A	Fam213a	-0.195136388142902	1.49022068066503	+	0.87349	1.14483
Q9QYJ3	DnaJ homolog subfamily B member 1	Dnajb1	-0.194949467976887	1.23951093453024		0.873603	1.14468
P09470	Angiotensin-converting enzyme;Angiotensin-converting enzyme, soluble form	Ace	-0.19451183742947	0.495646422681316		0.873869	1.14434
Q8JZM4	Delta and Notch-like epidermal growth factor-related receptor	Dner	-0.194349924723308	0.289015070741842		0.873967	1.14421
Q99NE5	Regulating synaptic membrane exocytosis protein 1	Rims1	-0.193958494398331	0.70176821774567		0.874204	1.1439
Q8BVY0	Ribosomal L1 domain-containing protein 1	Rsl1d1	-0.193719228108723	0.595611739284565		0.874349	1.14371
Q9QXY6	EH domain-containing protein 3	Ehd3	-0.193517049153645	1.2405081595942		0.874471	1.14355
Q810U4	Neuronal cell adhesion molecule	Nrcam	-0.192788230048286	1.91447893036377	+	0.874913	1.14297
O89053	Coronin-1A	Coro1a	-0.192225138346352	1.34570025678725	+	0.875255	1.14252
Q9D2R6	Cytochrome c oxidase assembly factor 3 homolog, mitochondrial	Coa3	-0.191428078545464	0.152039736327612		0.875738	1.14189
Q99KX1	Myeloid leukemia factor 2	Mlf2	-0.191178427802193	0.338586418075008		0.87589	1.1417
P62317	Small nuclear ribonucleoprotein Sm D2	Snrpd2	-0.190535015530056	0.688346731672578		0.876281	1.14119
P70704	Phospholipid-transporting ATPase IA	Atp8a1	-0.190122180514866	1.33867575373453	+	0.876531	1.14086
Q9ERG2	Striatin-3	Strn3	-0.189258363511829	0.710148644940942		0.877056	1.14018
Q9Z0Y1	Dynactin subunit 3	Dctn3	-0.188830905490452	0.809618868618108		0.877316	1.13984
Q9QXT0	Protein canopy homolog 2	Cnpy2	-0.188511742485893	1.07089459656352		0.87751	1.13959
P97467	Peptidyl-glycine alpha-amidating monooxygenase;Peptidylglycine alpha-hydroxylating monooxygenase;Peptidyl-alpha-hydroxyglycine alpha-amidating lyase	Pam	-0.188361273871529	0.507163965663798		0.877602	1.13947
Q8BJD1	Inter-alpha-trypsin inhibitor heavy chain H5	Itih5	-0.188286675347221	0.430491547761969		0.877647	1.13941
Q9JIG8	PRA1 family protein 2	Praf2	-0.188221401638454	1.28035747823633		0.877687	1.13936
P62281	40S ribosomal protein S11	Rps11	-0.187986161973743	0.776146937316305		0.87783	1.13917
Q91Z53	Glyoxylate reductase/hydroxypyruvate reductase	Grhpr	-0.187882741292317	0.680826266156237		0.877893	1.13909
Q9Z1J3	Cysteine desulfurase, mitochondrial	Nfs1	-0.187708960639107	0.270350014558935		0.877999	1.13895
Q60598	Src substrate cortactin	Cttn	-0.18769645690918	2.34332439969613	+	0.878007	1.13894
P70232	Neural cell adhesion molecule L1-like protein;Processed neural cell adhesion molecule L1-like protein	Chl1	-0.187684377034504	0.889763676995559		0.878014	1.13893
Q9D187	Mitotic spindle-associated MMXD complex subunit MIP18	Fam96b	-0.187474568684895	0.581228590808922		0.878142	1.13877
Q01405	Protein transport protein Sec23A	Sec23a	-0.18739954630534	2.65081283993496	+	0.878187	1.13871
Q9D0M3	Cytochrome c1, heme protein, mitochondrial	Cyc1	-0.187149895562065	2.30632666706421	+	0.878339	1.13851
Q8JZK9	Hydroxymethylglutaryl-CoA synthase, cytoplasmic	Hmgcs1	-0.187138239542644	1.54868248355281	+	0.878346	1.1385
Q9Z140	Copine-6	Cpne6	-0.18621423509386	2.31097025787947	+	0.878909	1.13777
Q8K400	Syntaxin-binding protein 5	Stxbp5	-0.186156590779621	1.07592957121486		0.878944	1.13773
Q8K1Z0	Ubiquinone biosynthesis protein COQ9, mitochondrial	Coq9	-0.186149385240345	1.11477579471629		0.878949	1.13772
Q3TGF2	Protein FAM107B	Fam107b	-0.186143451266819	0.437516411088225		0.878952	1.13772
E9Q8I9	Protein furry homolog	Fry	-0.186064614189995	0.502601839111513		0.879	1.13766
Q9Z2A5	Arginyl-tRNA--protein transferase 1	Ate1	-0.185631222195099	0.991061950859026		0.879264	1.13731
Q8BTI8	Serine/arginine repetitive matrix protein 2	Srrm2	-0.185346391465931	0.741646301093332		0.879438	1.13709
Q80TB8	Synaptic vesicle membrane protein VAT-1 homolog-like	Vat1l	-0.185012393527561	1.11165208524236		0.879642	1.13683
Q8BHC4	Dephospho-CoA kinase domain-containing protein	Dcakd	-0.184970008002388	0.647755710300523		0.879667	1.13679
O70493	Sorting nexin-12	Snx12	-0.184950934516056	0.956479142049562		0.879679	1.13678
P84078	ADP-ribosylation factor 1	Arf1	-0.184388478597008	0.938336715256032		0.880022	1.13634
Q3TMH2	Secernin-3	Scrn3	-0.184043036566841	0.36882504648179		0.880233	1.13606
Q62465	Synaptic vesicle membrane protein VAT-1 homolog	Vat1	-0.184031168619793	1.44681914609044	+	0.88024	1.13605
Q14C51	Pentatricopeptide repeat domain-containing protein 3, mitochondrial	Ptcd3	-0.183830261230469	0.546363633138195		0.880363	1.1359
Q80U28	MAP kinase-activating death domain protein	Madd	-0.183557722303604	1.1450882864361		0.880529	1.13568
Q9D4V7	Rab-like protein 3	Rabl3	-0.183151668972439	0.570754150512834		0.880777	1.13536
Q8R0A5	Transcription elongation factor A protein-like 3	Tceal3	-0.182892693413628	0.305640257149406		0.880935	1.13516
Q8CI71	Coiled-coil domain-containing protein 132	Ccdc132	-0.182876374986435	0.962536985843833		0.880945	1.13514
P15626	Glutathione S-transferase Mu 2	Gstm2	-0.182746887207031	0.377988911788501		0.881024	1.13504
Q9D8E6	60S ribosomal protein L4	Rpl4	-0.182545344034832	2.26771541264228	+	0.881147	1.13488
Q8BK30	NADH dehydrogenase [ubiquinone] flavoprotein 3, mitochondrial	Ndufv3	-0.180890613132053	0.701654628865951		0.882158	1.13358
Q9CQ26	STAM-binding protein	Stambp	-0.18083063761393	0.315636986761702		0.882195	1.13354
Q04519	Sphingomyelin phosphodiesterase	Smpd1	-0.180566575792099	0.776269926432445		0.882356	1.13333
Q61147	Ceruloplasmin	Cp	-0.180397033691406	0.264141715351034		0.88246	1.1332
Q9CXW2	28S ribosomal protein S22, mitochondrial	Mrps22	-0.179909812079536	0.78344102026386		0.882758	1.13281
O09167	60S ribosomal protein L21	Rpl21	-0.179819742838539	0.865213162213132		0.882813	1.13274
P62897	Cytochrome c, somatic	Cycs	-0.179811901516384	0.621179156602588		0.882818	1.13274
Q80U56	Late secretory pathway protein AVL9 homolog	Avl9	-0.179634518093533	0.554063892373788		0.882927	1.1326
Q148V7	LisH domain and HEAT repeat-containing protein KIAA1468	Kiaa1468	-0.179367277357311	3.29325417741492	+	0.88309	1.13239
Q9Z0L0	Trophoblast glycoprotein	Tpbg	-0.179103639390732	0.520294873123119		0.883252	1.13218
P36916	Guanine nucleotide-binding protein-like 1	Gnl1	-0.1789985232883	0.822935414441832		0.883316	1.1321
Q9D8B4	NADH dehydrogenase [ubiquinone] 1 alpha subcomplex subunit 11	Ndufa11	-0.178927527533638	0.98756381246191		0.883359	1.13204
Q8VD37	SH3-containing GRB2-like protein 3-interacting protein 1	Sgip1	-0.178321202596027	0.780334092145254		0.883731	1.13157
Q8R404	Protein QIL1	Qil1	-0.178318447536892	0.928503369053168		0.883732	1.13156
Q6P9K9	Neurexin-3	Nrxn3	-0.177705764770508	1.28655693214113		0.884108	1.13108
P54285	Voltage-dependent L-type calcium channel subunit beta-3	Cacnb3	-0.176883485582142	0.812651606281738		0.884612	1.13044
Q68FH0	Plakophilin-4	Pkp4	-0.176295386420357	0.122444594176537		0.884973	1.12998
P63030	Mitochondrial pyruvate carrier 1	Mpc1	-0.176219516330296	0.575846962764802		0.885019	1.12992
Q9DCS9	NADH dehydrogenase [ubiquinone] 1 beta subcomplex subunit 10	Ndufb10	-0.175998475816517	2.11467562352498	+	0.885155	1.12975
Q9D8T7	SRA stem-loop-interacting RNA-binding protein, mitochondrial	Slirp	-0.175946341620552	0.820402175077658		0.885187	1.12971
Q62419	Endophilin-A2	Sh3gl1	-0.175171110365124	0.915444171328305		0.885662	1.1291
Q6NZM9	Histone deacetylase 4	Hdac4	-0.175144407484268	0.567619317821007		0.885679	1.12908
Q9CZN4	Protein shisa-9	Shisa9	-0.175006654527454	0.349178404282432		0.885763	1.12897
Q9JI46	Diphosphoinositol polyphosphate phosphohydrolase 1	Nudt3	-0.17457707722982	1.83585586643708	+	0.886027	1.12863
P43006	Excitatory amino acid transporter 2	Slc1a2	-0.174045986599392	1.80326160937729	+	0.886353	1.12822
Q9ESZ8	General transcription factor II-I	Gtf2i	-0.173994064331055	0.13397641626353		0.886385	1.12818
Q9DCZ4	Apolipoprotein O	Apoo	-0.173685285780167	1.60842149171058	+	0.886575	1.12794
Q8BVG8	N-acetyltransferase 14	Nat14	-0.173678927951389	0.352442607572657		0.886579	1.12793
Q8R146	Acylamino-acid-releasing enzyme	Apeh	-0.173640780978733	0.1771856583351		0.886602	1.1279
Q9CPR5	39S ribosomal protein L15, mitochondrial	Mrpl15	-0.173591825697159	0.407789297068464		0.886633	1.12786
P57746	V-type proton ATPase subunit D	Atp6v1d	-0.173571904500328	1.32031375512349	+	0.886645	1.12785
Q9CPQ1	Cytochrome c oxidase subunit 6C	Cox6c	-0.172862370808922	1.06697547936761		0.887081	1.12729
Q62277	Synaptophysin	Syp	-0.172498914930554	1.04523942183561		0.887304	1.12701
Q8K221	Arfaptin-2	Arfip2	-0.172340181138782	1.08764524565924		0.887402	1.12688
Q9QUR7	Peptidyl-prolyl cis-trans isomerase NIMA-interacting 1	Pin1	-0.171976725260418	0.944976203630331		0.887626	1.1266
P03930	ATP synthase protein 8	Mtatp8	-0.171952141655819	1.1853214915873		0.887641	1.12658
Q99JP7	Gamma-glutamyltransferase 7;Gamma-glutamyltransferase 7 heavy chain;Gamma-glutamyltransferase 7 light chain	Ggt7	-0.171794043646919	0.711555524131998		0.887738	1.12646
P35486	Pyruvate dehydrogenase E1 component subunit alpha, somatic form, mitochondrial	Pdha1	-0.171669006347656	3.73645272959991	+	0.887815	1.12636
Q6P9S0	MTSS1-like protein	Mtss1l	-0.171350055270725	0.224709121762047		0.888011	1.12611
P16675	Lysosomal protective protein;Lysosomal protective protein 32 kDa chain;Lysosomal protective protein 20 kDa chain	Ctsa	-0.170463562011719	0.46678749196764		0.888557	1.12542
P62492	Ras-related protein Rab-11A	Rab11a	-0.170442793104385	0.3815318446984		0.88857	1.1254
P63082	V-type proton ATPase 16 kDa proteolipid subunit	Atp6v0c	-0.169991175333656	0.153558606969454		0.888848	1.12505
O08715	A-kinase anchor protein 1, mitochondrial	Akap1	-0.169638103908962	0.537225722935457		0.889066	1.12478
O89079	Coatomer subunit epsilon	Cope	-0.169251335991753	1.63869169604474	+	0.889304	1.12447
P55012	Solute carrier family 12 member 2	Slc12a2	-0.169092602199978	0.410648604942029		0.889402	1.12435
Q920E5	Farnesyl pyrophosphate synthase	Fdps	-0.169071621365017	0.584352967497111		0.889415	1.12433
P70349	Histidine triad nucleotide-binding protein 1	Hint1	-0.16886986626519	0.716972094469966		0.889539	1.12418
Q9R0B9	Procollagen-lysine,2-oxoglutarate 5-dioxygenase 2	Plod2	-0.168553034464519	0.679593802100815		0.889735	1.12393
Q9CXZ1	NADH dehydrogenase [ubiquinone] iron-sulfur protein 4, mitochondrial	Ndufs4	-0.16743172539605	1.08090062491435		0.890426	1.12306
Q9Z110	Delta-1-pyrroline-5-carboxylate synthase;Glutamate 5-kinase;Gamma-glutamyl phosphate reductase	Aldh18a1	-0.167131635877823	1.08375754423899		0.890612	1.12282
Q8C6E0	Cilia- and flagella-associated protein 36	Cfap36	-0.166750801934135	0.447529663182304		0.890847	1.12253
Q80VP1	Epsin-1	Epn1	-0.166408114963108	1.30339068810747	+	0.891058	1.12226
Q9D7X3	Dual specificity protein phosphatase 3	Dusp3	-0.166401333279083	0.82987527333772		0.891063	1.12226
Q9WTL7	Acyl-protein thioesterase 2	Lypla2	-0.165537304348415	0.422005417401302		0.891596	1.12158
P45952	Medium-chain specific acyl-CoA dehydrogenase, mitochondrial	Acadm	-0.165169186062286	1.4689567754663	+	0.891824	1.1213
P50571	Gamma-aminobutyric acid receptor subunit beta-1	Gabrb1	-0.164873970879452	0.787315030891541		0.892006	1.12107
Q91VE0	Long-chain fatty acid transport protein 4	Slc27a4	-0.16486104329427	1.05017748664718		0.892014	1.12106
Q5XG69	Soluble lamin-associated protein of 75 kDa	Fam169a	-0.164683024088539	0.387073179451215		0.892125	1.12092
Q80X80	C2 domain-containing protein 2-like	C2cd2l	-0.164397557576496	0.846144089021557		0.892301	1.1207
Q8BQZ4	Ral GTPase-activating protein subunit beta	Ralgapb	-0.164291805691189	0.769237912281796		0.892366	1.12062
Q8K1J6	CCA tRNA nucleotidyltransferase 1, mitochondrial	Trnt1	-0.163494110107422	0.82860808174441		0.89286	1.12
Q7TQF7	Amphiphysin	Amph	-0.163468466864693	1.19359334694217		0.892876	1.11998
Q3UDF0		Slc2a6	-0.163279639350044	0.414032121808496		0.892993	1.11983
P62881	Guanine nucleotide-binding protein subunit beta-5	Gnb5	-0.16294945610894	0.845857489265769		0.893197	1.11957
Q9JLV1	BAG family molecular chaperone regulator 3	Bag3	-0.162501229180229	0.117443236501352		0.893475	1.11923
Q8C8N2	Protein SCAI	Scai	-0.162489573160808	0.768434939314981		0.893482	1.11922
Q9R0N0	Galactokinase	Galk1	-0.161815219455296	0.38842349387454		0.8939	1.11869
P70302	Stromal interaction molecule 1	Stim1	-0.161624272664387	0.905985848590846		0.894018	1.11855
Q9Z0E0	Neurochondrin	Ncdn	-0.161306381225586	0.971723721847507		0.894215	1.1183
Q9JIX0	Transcription and mRNA export factor ENY2	Eny2	-0.160832299126518	0.237085613270357		0.894509	1.11793
Q6P5U7	NACHT and WD repeat domain-containing protein 2	Nwd2	-0.160732269287109	0.677290497279895		0.894571	1.11785
Q69ZK9;Q99K10	Neuroligin-2;Neuroligin-1	Nlgn2;Nlgn1	-0.160627365112305	0.530428781904974		0.894636	1.11777
Q52KF3	Protein spire homolog 1	Spire1	-0.160574383205837	0.203423794834589		0.894669	1.11773
Q9DCT2	NADH dehydrogenase [ubiquinone] iron-sulfur protein 3, mitochondrial	Ndufs3	-0.160264333089192	1.25613519164511		0.894861	1.11749
Q8R349	Cell division cycle protein 16 homolog	Cdc16	-0.159953011406792	0.218229333694444		0.895054	1.11725
P61967	AP-1 complex subunit sigma-1A	Ap1s1	-0.159879896375866	0.422710707884732		0.8951	1.11719
O08759	Ubiquitin-protein ligase E3A	Ube3a	-0.159819285074867	1.85544556545273	+	0.895137	1.11715
Q9JLV5	Cullin-3	Cul3	-0.159624099731445	1.24390656779902		0.895258	1.117
P63323	40S ribosomal protein S12	Rps12	-0.159478293524849	0.69874475763323		0.895349	1.11688
Q9D1M0	Protein SEC13 homolog	Sec13	-0.159330791897244	0.747819161042967		0.89544	1.11677
P35276	Ras-related protein Rab-3D	Rab3d	-0.15933057996962	0.719343416629696		0.89544	1.11677
Q9D2M8	Ubiquitin-conjugating enzyme E2 variant 2	Ube2v2	-0.159279505411781	1.39662633527616	+	0.895472	1.11673
A4Q9F6	Tubulin polyglutamylase TTLL13	Ttll13	-0.159027099609375	0.176440265071178		0.895629	1.11653
Q9CR61	NADH dehydrogenase [ubiquinone] 1 beta subcomplex subunit 7	Ndufb7	-0.158748838636608	1.01491020603639		0.895802	1.11632
Q80X50	Ubiquitin-associated protein 2-like	Ubap2l	-0.158547083536781	1.78586808043144	+	0.895927	1.11616
Q8K183	Pyridoxal kinase	Pdxk	-0.158357832166885	0.770219891702423		0.896044	1.11602
O88448	Kinesin light chain 2	Klc2	-0.157611423068577	0.967206884864497		0.896508	1.11544
Q61205	Platelet-activating factor acetylhydrolase IB subunit gamma	Pafah1b3	-0.157022476196289	1.08422280696349		0.896874	1.11498
Q8BLF1	Neutral cholesterol ester hydrolase 1	Nceh1	-0.156955295138889	1.70415693384868	+	0.896916	1.11493
Q9Z2D0	Myotubularin-related protein 9	Mtmr9	-0.156789567735462	1.08873589448538		0.897019	1.1148
Q8CBW3	Abl interactor 1	Abi1	-0.156516604953342	1.53488435926101	+	0.897189	1.11459
Q61024	Asparagine synthetase [glutamine-hydrolyzing]	Asns	-0.156406614515518	0.533185666649957		0.897257	1.11451
O70591	Prefoldin subunit 2	Pfdn2	-0.156218634711372	1.04858610131202		0.897374	1.11436
P63280	SUMO-conjugating enzyme UBC9	Ube2i	-0.156160354614258	0.545114422583365		0.89741	1.11432
Q8K273	Membrane magnesium transporter 1	Mmgt1	-0.155634350246853	0.47051829575771		0.897738	1.11391
P34152	Focal adhesion kinase 1	Ptk2	-0.155633078681099	0.643427859118442		0.897738	1.11391
Q8CHP8	Phosphoglycolate phosphatase	Pgp	-0.155502319335938	1.03517399661616		0.89782	1.11381
P97450	ATP synthase-coupling factor 6, mitochondrial	Atp5j	-0.155071682400173	1.67050138123055	+	0.898088	1.11348
Q9CQN3	Mitochondrial import receptor subunit TOM6 homolog	Tomm6	-0.154905743069119	0.185053602216724		0.898191	1.11335
P28663	Beta-soluble NSF attachment protein	Napb	-0.154816309611004	0.989963809197117		0.898247	1.11328
Q6PH08	ERC protein 2	Erc2	-0.154680464002823	0.258796857949544		0.898331	1.11318
Q3UHK1	Proton myo-inositol cotransporter	Slc2a13	-0.154429965549046	0.424606365349925		0.898487	1.11298
P35980	60S ribosomal protein L18	Rpl18	-0.153462092081707	1.20855473567391		0.89909	1.11224
Q06185	ATP synthase subunit e, mitochondrial	Atp5i	-0.152963638305664	2.09923046984354	+	0.899401	1.11185
Q8CBY8	Dynactin subunit 4	Dctn4	-0.152860005696613	1.77587307965671	+	0.899466	1.11177
Q9D898	Actin-related protein 2/3 complex subunit 5-like protein	Arpc5l	-0.152475145128037	0.913047573274209		0.899706	1.11147
P43024	Cytochrome c oxidase subunit 6A1, mitochondrial	Cox6a1	-0.152131398518883	0.93002657031817		0.89992	1.11121
P70699	Lysosomal alpha-glucosidase	Gaa	-0.151685502794052	0.968644534733487		0.900198	1.11087
Q61316	Heat shock 70 kDa protein 4	Hspa4	-0.151439030965168	3.59520471323628	+	0.900352	1.11068
Q99MN1	Lysine--tRNA ligase	Kars	-0.151205910576714	2.0835540587289	+	0.900497	1.1105
Q6GSS7;Q64523	Histone H2A type 2-A;Histone H2A type 2-C	Hist2h2aa1;Hist2h2ac	-0.15111796061198	0.149697849688725		0.900552	1.11043
Q6P542	ATP-binding cassette sub-family F member 1	Abcf1	-0.150576697455509	1.24406588745814		0.90089	1.11001
Q8BRH0	Transmembrane and TPR repeat-containing protein 3	Tmtc3	-0.150400585598415	0.383289402323305		0.901	1.10988
O08585	Clathrin light chain A	Clta	-0.150036282009552	0.759101642698302		0.901228	1.1096
O08532	Voltage-dependent calcium channel subunit alpha-2/delta-1;Voltage-dependent calcium channel subunit alpha-2-1;Voltage-dependent calcium channel subunit delta-1	Cacna2d1	-0.149983512030708	0.565869193050806		0.901261	1.10956
Q8BP67	60S ribosomal protein L24	Rpl24	-0.149880091349285	0.991842599199082		0.901325	1.10948
O35345	Importin subunit alpha-7	Kpna6	-0.149753146701389	0.893323396524625		0.901405	1.10938
P47963	60S ribosomal protein L13	Rpl13	-0.1497130923801	1.11707523459959		0.90143	1.10935
Q61595	Kinectin	Ktn1	-0.149693806966145	0.684540483525563		0.901442	1.10933
Q6PIE5	Sodium/potassium-transporting ATPase subunit alpha-2	Atp1a2	-0.149444368150501	0.861949992657221		0.901598	1.10914
Q7TT15	Putative polypeptide N-acetylgalactosaminyltransferase-like protein 3	Wbscr17	-0.149127536349827	0.204550657507359		0.901796	1.1089
P56135	ATP synthase subunit f, mitochondrial	Atp5j2	-0.148761113484699	1.29543274966495		0.902025	1.10862
Q9D1I5	Methylmalonyl-CoA epimerase, mitochondrial	Mcee	-0.148551093207466	1.19778839082318		0.902156	1.10846
P15532	Nucleoside diphosphate kinase A	Nme1	-0.148518456353084	0.833242826184212		0.902176	1.10843
P97765	WW domain-binding protein 2	Wbp2	-0.148494084676106	0.484636410699479		0.902192	1.10841
G5E870	E3 ubiquitin-protein ligase TRIP12	Trip12	-0.148464838663738	0.426825018824912		0.90221	1.10839
Q91VD9	NADH-ubiquinone oxidoreductase 75 kDa subunit, mitochondrial	Ndufs1	-0.147960874769424	2.77567390830557	+	0.902525	1.108
Q8VD04	GRIP1-associated protein 1	Gripap1	-0.147851520114472	0.685447359899358		0.902594	1.10792
P40124	Adenylyl cyclase-associated protein 1	Cap1	-0.147735171847874	2.66416614423926	+	0.902666	1.10783
Q8BML9		Qars	-0.147319793701172	1.45624070092987	+	0.902926	1.10751
Q9Z2A0	3-phosphoinositide-dependent protein kinase 1	Pdpk1	-0.146873474121094	0.137978377778492		0.903206	1.10717
Q99LI7	Cleavage stimulation factor subunit 3	Cstf3	-0.146455976698132	0.0612889088429558		0.903467	1.10685
O70324	Monocarboxylate transporter 8	Slc16a2	-0.1458379957411	0.172019367468345		0.903854	1.10637
Q9CQC7	NADH dehydrogenase [ubiquinone] 1 beta subcomplex subunit 4	Ndufb4	-0.145769966973198	0.900060467345681		0.903897	1.10632
Q6IR34	G-protein-signaling modulator 1	Gpsm1	-0.145703845553928	0.423306064016228		0.903938	1.10627
P97785	GDNF family receptor alpha-1	Gfra1	-0.145355224609375	0.427355179291025		0.904157	1.106
Q80TM6	R3H domain-containing protein 2	R3hdm2	-0.145318984985352	0.243165869763536		0.904179	1.10598
P53026	60S ribosomal protein L10a	Rpl10a	-0.144850201076931	0.799025645744252		0.904473	1.10562
P47962	60S ribosomal protein L5	Rpl5	-0.144800821940105	1.02524869385151		0.904504	1.10558
Q8C8R3	Ankyrin-2	Ank2	-0.14464611477322	0.763894414478365		0.904601	1.10546
Q9D1M4	Eukaryotic translation elongation factor 1 epsilon-1	Eef1e1	-0.144354714287651	0.751230283351194		0.904784	1.10524
Q60967	Bifunctional 3-phosphoadenosine 5-phosphosulfate synthase 1;Sulfate adenylyltransferase;Adenylyl-sulfate kinase	Papss1	-0.14423010084364	0.549474809158803		0.904862	1.10514
Q11136	Xaa-Pro dipeptidase	Pepd	-0.143963072035049	0.13994199266607		0.90503	1.10494
Q6ZWV7	60S ribosomal protein L35	Rpl35	-0.143343607584637	0.450169301895386		0.905418	1.10446
Q9CXW4	60S ribosomal protein L11	Rpl11	-0.142884784274631	1.64228544962248	+	0.905706	1.10411
Q922J3	CAP-Gly domain-containing linker protein 1	Clip1	-0.142797046237522	0.591241560897235		0.905761	1.10404
P14206	40S ribosomal protein SA	Rpsa	-0.142683453030056	1.62657704518156	+	0.905833	1.10396
B2RUJ5	Amyloid beta A4 precursor protein-binding family A member 1	Apba1	-0.142288843790688	0.789805052432597		0.906081	1.10365
Q9CPV4	Glyoxalase domain-containing protein 4	Glod4	-0.142098320855034	0.946833406288172		0.9062	1.10351
Q9CRB6	Tubulin polymerization-promoting protein family member 3	Tppp3	-0.142028596666123	0.330863348654473		0.906244	1.10346
Q9QZM0	Ubiquilin-2	Ubqln2	-0.141691631740994	0.753875029718087		0.906456	1.1032
Q9CZN7	Serine hydroxymethyltransferase	Shmt2	-0.141600926717125	0.668209315597073		0.906513	1.10313
Q80YV4	Pantothenate kinase 4	Pank4	-0.141277525160049	0.789852719176684		0.906716	1.10288
Q9CR51	V-type proton ATPase subunit G 1	Atp6v1g1	-0.14111116197374	0.964289436002617		0.90682	1.10275
Q8BHC1	Ras-related protein Rab-39B	Rab39b	-0.140798992580837	0.35824075481848		0.907017	1.10252
Q99LC3	NADH dehydrogenase [ubiquinone] 1 alpha subcomplex subunit 10, mitochondrial	Ndufa10	-0.139807595147026	2.19866422673202	+	0.90764	1.10176
O70456	14-3-3 protein sigma	Sfn	-0.139720916748047	0.0766784065393709		0.907695	1.10169
Q8K377	Leucine-rich repeat transmembrane neuronal protein 1	Lrrtm1	-0.139706293741863	0.229850581076789		0.907704	1.10168
Q9CRA5	Golgi phosphoprotein 3	Golph3	-0.139392852783203	0.67532311871346		0.907901	1.10144
P62748	Hippocalcin-like protein 1	Hpcal1	-0.139315923055012	1.34120452549618	+	0.90795	1.10138
P13011	Acyl-CoA desaturase 2	Scd2	-0.139133665296765	0.145399941469543		0.908064	1.10124
Q2TBE6	Phosphatidylinositol 4-kinase type 2-alpha	Pi4k2a	-0.139127307467991	0.582803168947023		0.908068	1.10124
Q99JR5	Tubulointerstitial nephritis antigen-like	Tinagl1	-0.139006932576496	0.133398248987734		0.908144	1.10115
Q8CJ19	Protein-methionine sulfoxide oxidase MICAL3	Mical3	-0.138894187079536	0.108907490430015		0.908215	1.10106
P68040	Guanine nucleotide-binding protein subunit beta-2-like 1;Guanine nucleotide-binding protein subunit beta-2-like 1, N-terminally processed	Gnb2l1	-0.138769573635525	2.29726949342502	+	0.908293	1.10097
Q6PHS9	Voltage-dependent calcium channel subunit alpha-2/delta-2;Voltage-dependent calcium channel subunit alpha-2-2;Voltage-dependent calcium channel subunit delta-2	Cacna2d2	-0.138711717393665	0.0900730968840035		0.90833	1.10092
Q7TMY8	E3 ubiquitin-protein ligase HUWE1	Huwe1	-0.138589859008789	1.99921417235608	+	0.908407	1.10083
Q3UPH1	Protein PRRC1	Prrc1	-0.138052834404842	1.053722024475		0.908745	1.10042
Q6NXK8	Acid-sensing ion channel 1	Asic1	-0.137762705485027	0.51813656209698		0.908928	1.1002
P59326	YTH domain-containing family protein 1	Ythdf1	-0.137455622355144	0.908083005352573		0.909121	1.09996
Q922H2	[Pyruvate dehydrogenase (acetyl-transferring)] kinase isozyme 3, mitochondrial	Pdk3	-0.137348598904079	0.734238215346787		0.909189	1.09988
P33173	Kinesin-like protein KIF1A	Kif1a	-0.137191772460938	2.10196552506959	+	0.909287	1.09976
Q8CHT1	Ephexin-1	Ngef	-0.137045330471462	0.542218199621617		0.90938	1.09965
Q9D051	Pyruvate dehydrogenase E1 component subunit beta, mitochondrial	Pdhb	-0.136895285712349	2.23127818648462	+	0.909474	1.09954
Q8BU30	Isoleucine--tRNA ligase, cytoplasmic	Iars	-0.136895073784721	1.9120137100577	+	0.909474	1.09954
Q9CZD3	Glycine--tRNA ligase	Gars	-0.136890411376953	1.12613031680393		0.909477	1.09953
Q99KF1	Transmembrane emp24 domain-containing protein 9	Tmed9	-0.136485841539169	0.601479726258016		0.909732	1.09922
A6H5Z3	Exocyst complex component 6B	Exoc6b	-0.135951148139107	0.162056832219371		0.91007	1.09882
P11499	Heat shock protein HSP 90-beta	Hsp90ab1	-0.135860019259983	4.57770455300403	+	0.910127	1.09875
Q8BYI9	Tenascin-R	Tnr	-0.135680516560875	0.43682980885451		0.91024	1.09861
Q99L45	Eukaryotic translation initiation factor 2 subunit 2	Eif2s2	-0.135405222574871	0.968126410689197		0.910414	1.0984
P62812	Gamma-aminobutyric acid receptor subunit alpha-1	Gabra1	-0.135251363118492	0.475911330517816		0.910511	1.09828
Q99104	Unconventional myosin-Va	Myo5a	-0.135224872165256	1.52935032556617	+	0.910528	1.09826
Q5SRX1	TOM1-like protein 2	Tom1l2	-0.134843190511067	1.85248167619423	+	0.910769	1.09797
Q9ERB0	Synaptosomal-associated protein 29	Snap29	-0.134148279825848	1.04375306073363		0.911208	1.09744
Q8C7X2	ER membrane protein complex subunit 1	Emc1	-0.133989969889324	0.672317352769914		0.911308	1.09732
P58742	Aladin	Aaas	-0.133988486395943	0.361052690802757		0.911309	1.09732
P99028	Cytochrome b-c1 complex subunit 6, mitochondrial	Uqcrh	-0.13382127549913	0.554771091903275		0.911414	1.0972
Q78IK2	Up-regulated during skeletal muscle growth protein 5	Usmg5	-0.13354280259874	0.472798519460749		0.91159	1.09698
P31650	Sodium- and chloride-dependent GABA transporter 3	Slc6a11	-0.133540895250107	0.387528733720174		0.911591	1.09698
Q9Z1K5	E3 ubiquitin-protein ligase ARIH1	Arih1	-0.133296330769856	0.361503484863255		0.911746	1.0968
P62911	60S ribosomal protein L32	Rpl32	-0.133038202921551	0.500753065691697		0.911909	1.0966
O35566	CD151 antigen	Cd151	-0.132639355129665	0.0879995985801805		0.912161	1.0963
Q8BI06	Cell migration-inducing and hyaluronan-binding protein	Cemip	-0.13246790568034	0.136423743850704		0.91227	1.09617
O70496	H(+)/Cl(-) exchange transporter 7	Clcn7	-0.132047653198242	0.111800139608625		0.912535	1.09585
O35454	Chloride transport protein 6	Clcn6	-0.132035785251194	0.444173741009789		0.912543	1.09584
O88342	WD repeat-containing protein 1	Wdr1	-0.131575902303062	1.8275307308174	+	0.912834	1.09549
Q91YN9	BAG family molecular chaperone regulator 2	Bag2	-0.131318410237629	0.737640088776274		0.912997	1.09529
P97807	Fumarate hydratase, mitochondrial	Fh	-0.131000518798828	1.97273214495493	+	0.913198	1.09505
Q9DC23	DnaJ homolog subfamily C member 10	Dnajc10	-0.130730311075848	0.405550125120663		0.913369	1.09485
Q56A07	Sodium channel subunit beta-2	Scn2b	-0.130704667833118	0.203980944127068		0.913385	1.09483
P12382	ATP-dependent 6-phosphofructokinase, liver type	Pfkl	-0.129998948838974	0.569783626265369		0.913832	1.09429
Q99P72	Reticulon-4	Rtn4	-0.129706912570526	1.67115862057953	+	0.914017	1.09407
O35633	Vesicular inhibitory amino acid transporter	Slc32a1	-0.129471249050564	0.917866595845002		0.914166	1.09389
Q99L27	GMP reductase 2	Gmpr2	-0.129316541883679	0.639662041658924		0.914264	1.09378
P29387	Guanine nucleotide-binding protein subunit beta-4	Gnb4	-0.129295137193466	0.568253049912145		0.914278	1.09376
Q9DCJ5	NADH dehydrogenase [ubiquinone] 1 alpha subcomplex subunit 8	Ndufa8	-0.128664016723633	1.92103674136948	+	0.914678	1.09328
Q9CWJ9	Bifunctional purine biosynthesis protein PURH;Phosphoribosylaminoimidazolecarboxamide formyltransferase;IMP cyclohydrolase	Atic	-0.128180397881405	0.651601755512124		0.914985	1.09291
Q8BHL5	Engulfment and cell motility protein 2	Elmo2	-0.127748065524631	0.575258701096258		0.915259	1.09259
P36993	Protein phosphatase 1B	Ppm1b	-0.12737316555447	0.461817455215535		0.915497	1.0923
Q62523	Zyxin	Zyx	-0.126817491319446	0.326798257963048		0.91585	1.09188
Q8K268	ATP-binding cassette sub-family F member 3	Abcf3	-0.126525243123375	0.526353719007919		0.916035	1.09166
Q3TDD9	Protein phosphatase 1 regulatory subunit 21	Ppp1r21	-0.126525031195747	0.533129805737661		0.916035	1.09166
Q7TSV4	Phosphoglucomutase-2	Pgm2	-0.125880771213108	0.155098792872785		0.916444	1.09117
Q9CQA3	Succinate dehydrogenase [ubiquinone] iron-sulfur subunit, mitochondrial	Sdhb	-0.125861909654407	1.03569152374752		0.916456	1.09116
Q920Q6	RNA-binding protein Musashi homolog 2	Msi2	-0.125769297281902	0.468504015722947		0.916515	1.09109
Q5SQX6	Cytoplasmic FMR1-interacting protein 2	Cyfip2	-0.125672870212131	0.999063074438735		0.916576	1.09102
Q8R5C5	Beta-centractin	Actr1b	-0.125604417588978	1.82150837775898	+	0.91662	1.09096
Q9D6U8	Protein FAM162A	Fam162a	-0.125178654988609	0.518475644677922		0.91689	1.09064
Q7M6Y3	Phosphatidylinositol-binding clathrin assembly protein	Picalm	-0.124875174628361	0.42994733441852		0.917083	1.09041
O55091	Protein IMPACT	Impact	-0.124753528171112	0.564452312930436		0.917161	1.09032
O70475	UDP-glucose 6-dehydrogenase	Ugdh	-0.124683803982204	0.233864193178396		0.917205	1.09027
P47753	F-actin-capping protein subunit alpha-1	Capza1	-0.124503665500217	0.509845225973411		0.91732	1.09013
P35979	60S ribosomal protein L12	Rpl12	-0.123826344807942	1.01339766127583		0.91775	1.08962
Q923D5	WW domain-binding protein 11	Wbp11	-0.12381871541341	0.268087781086028		0.917755	1.08962
P14131	40S ribosomal protein S16	Rps16	-0.123664855957031	0.636204325140041		0.917853	1.0895
O54825	Bystin	Bysl	-0.12341923183865	0.14001223540574		0.918009	1.08931
O35857	Mitochondrial import inner membrane translocase subunit TIM44	Timm44	-0.123056623670788	1.36037037541195	+	0.91824	1.08904
Q9CR09	Ubiquitin-fold modifier-conjugating enzyme 1	Ufc1	-0.123007244533962	0.445065774777848		0.918272	1.089
Q8BGT8	Phytanoyl-CoA hydroxylase-interacting protein-like	Phyhipl	-0.122676213582356	1.34953938695804	+	0.918482	1.08875
P03888	NADH-ubiquinone oxidoreductase chain 1	Mtnd1	-0.122613906860352	0.753819051902426		0.918522	1.08871
Q8BWT1	3-ketoacyl-CoA thiolase, mitochondrial	Acaa2	-0.122523413764107	0.556835042007106		0.91858	1.08864
Q5F285	Transmembrane protein 256	Tmem256	-0.122518751356338	0.286880915965457		0.918583	1.08863
Q6PAR5	GTPase-activating protein and VPS9 domain-containing protein 1	Gapvd1	-0.122187932332356	0.579597531633374		0.918793	1.08838
Q6PCP5	Mitochondrial fission factor	Mff	-0.122141096327038	1.269045849627		0.918823	1.08835
Q9D4C9	Clavesin-1	Clvs1	-0.122136645846897	0.208704724019648		0.918826	1.08835
P62821	Ras-related protein Rab-1A	Rab1A	-0.121920267740887	1.42506009828677	+	0.918964	1.08818
P04925	Major prion protein	Prnp	-0.121813032362198	0.379407694354782		0.919032	1.0881
Q99ME2	WD repeat-containing protein 6	Wdr6	-0.12160258822971	0.356391205621094		0.919166	1.08794
Q62448	Eukaryotic translation initiation factor 4 gamma 2	Eif4g2	-0.120942433675133	0.990304427328063		0.919587	1.08744
P0C192	Leucine-rich repeat-containing protein 4B	Lrrc4b	-0.120933108859592	0.453681218817192		0.919593	1.08744
Q3KNM2	E3 ubiquitin-protein ligase MARCH5	March5	-0.120930141872829	0.522692283949866		0.919595	1.08744
P14869	60S acidic ribosomal protein P0	Rplp0	-0.12092611524794	1.94582142281131	+	0.919597	1.08743
Q9QXL2	Kinesin-like protein KIF21A	Kif21a	-0.120609707302517	0.464407705979333		0.919799	1.08719
Q6ZWU9	40S ribosomal protein S27	Rps27	-0.120478524102104	0.590192117314972		0.919882	1.0871
A2ASS6	Titin	Ttn	-0.120295418633354	0.585593857730211		0.919999	1.08696
Q8CGC7	Bifunctional glutamate/proline--tRNA ligase;Glutamate--tRNA ligase;Proline--tRNA ligase	Eprs	-0.11966832478841	2.85679043663674	+	0.920399	1.08649
Q9R1L5;Q3U214	Microtubule-associated serine/threonine-protein kinase 1;Microtubule-associated serine/threonine-protein kinase 3	Mast1;Mast3	-0.119523578219944	0.34499836764303		0.920492	1.08638
P05063	Fructose-bisphosphate aldolase C	Aldoc	-0.119428210788303	0.977652173474692		0.920552	1.0863
Q9JKC6	Cell cycle exit and neuronal differentiation protein 1	Cend1	-0.119377136230469	0.382163344781648		0.920585	1.08627
Q9R069	Basal cell adhesion molecule	Bcam	-0.119330512152779	0.303761353309045		0.920615	1.08623
Q80SW1	Putative adenosylhomocysteinase 2	Ahcyl1	-0.119160122341579	0.95745133876138		0.920724	1.0861
Q9D6K5	Synaptojanin-2-binding protein	Synj2bp	-0.11863475375705	0.143298131152884		0.921059	1.08571
P63011	Ras-related protein Rab-3A	Rab3a	-0.118358400132919	1.41811096547564	+	0.921235	1.0855
Q9WTQ5	A-kinase anchor protein 12	Akap12	-0.117946412828232	0.204809190957859		0.921498	1.08519
P63325	40S ribosomal protein S10	Rps10	-0.117802937825523	0.723739826763517		0.92159	1.08508
Q9D7E4	UPF0449 protein C19orf25 homolog		-0.117599699232315	0.82537385599442		0.92172	1.08493
Q91WD5	NADH dehydrogenase [ubiquinone] iron-sulfur protein 2, mitochondrial	Ndufs2	-0.117468939887154	1.14161732801879		0.921803	1.08483
O70252	Heme oxygenase 2	Hmox2	-0.117467032538521	0.51631149572663		0.921805	1.08483
P26039	Talin-1	Tln1	-0.117448382907444	0.263116387037674		0.921817	1.08481
Q922Q1	Mitochondrial amidoxime reducing component 2	Marc2	-0.117314020792644	0.852567982868486		0.921902	1.08471
Q8BYB9	Protein O-glucosyltransferase 1	Poglut1	-0.116215387980144	0.272782688894624		0.922605	1.08389
P47955	60S acidic ribosomal protein P1	Rplp1	-0.116102642483181	0.584408087355679		0.922677	1.0838
Q91VI7	Ribonuclease inhibitor	Rnh1	-0.116072972615562	0.448348074732801		0.922696	1.08378
D3YXK2	Scaffold attachment factor B1	Safb	-0.116035249498154	0.419110770822518		0.92272	1.08375
P58059	28S ribosomal protein S21, mitochondrial	Mrps21	-0.115813785129124	0.202184460935785		0.922862	1.08359
O70152	Dolichol-phosphate mannosyltransferase subunit 1	Dpm1	-0.115804884168838	0.414420748741851		0.922867	1.08358
P26638	Serine--tRNA ligase, cytoplasmic	Sars	-0.115778181287975	0.980794847183042		0.922884	1.08356
Q7TT50	Serine/threonine-protein kinase MRCK beta	Cdc42bpb	-0.115738126966686	0.700293238453638		0.92291	1.08353
Q8VEK0	Cell cycle control protein 50A	Tmem30a	-0.115493562486435	0.551785683083659		0.923066	1.08335
P06151	L-lactate dehydrogenase A chain	Ldha	-0.115441852145725	0.526490833049233		0.9231	1.08331
A2CG49	Kalirin	Kalrn	-0.115318934122723	0.575052457090902		0.923178	1.08321
Q9DCD0	6-phosphogluconate dehydrogenase, decarboxylating	Pgd	-0.115156385633679	1.04301971719808		0.923282	1.08309
P97820	Mitogen-activated protein kinase kinase kinase kinase 4	Map4k4	-0.114971796671551	0.19071743507832		0.9234	1.08295
Q3TPX4	Exocyst complex component 5	Exoc5	-0.114922205607094	0.686139022137576		0.923432	1.08292
Q8BJH1	Zinc finger C2HC domain-containing protein 1A	Zc2hc1a	-0.11473782857259	0.450615630148187		0.92355	1.08278
Q9D6M3	Mitochondrial glutamate carrier 1	Slc25a22	-0.114600499471027	0.738790973776667		0.923638	1.08268
Q9ESN6	Tripartite motif-containing protein 2	Trim2	-0.11435932583279	0.708275963295388		0.923792	1.08249
P27546	Microtubule-associated protein 4	Map4	-0.114301681518555	1.04478552298257		0.923829	1.08245
Q91X97	Neurocalcin-delta	Ncald	-0.114195505777992	0.461040313815302		0.923897	1.08237
P60202	Myelin proteolipid protein	Plp1	-0.113983154296875	0.145065519497184		0.924033	1.08221
Q9CQ69	Cytochrome b-c1 complex subunit 8	Uqcrq	-0.113737954033745	0.669944869976615		0.92419	1.08203
Q8BG51	Mitochondrial Rho GTPase 1	Rhot1	-0.113585578070747	0.604901558424172		0.924288	1.08191
Q05D44	Eukaryotic translation initiation factor 5B	Eif5b	-0.113318337334526	0.56031164150486		0.924459	1.08171
O55057	Retinal rod rhodopsin-sensitive cGMP 3,5-cyclic phosphodiesterase subunit delta	Pde6d	-0.113221486409504	0.263952937721885		0.924521	1.08164
Q91W50	Cold shock domain-containing protein E1	Csde1	-0.113139258490669	2.11850520385396	+	0.924574	1.08158
Q9R1Q8	Transgelin-3	Tagln3	-0.113085852728947	0.380351756758722		0.924608	1.08154
P70670;Q60817	Nascent polypeptide-associated complex subunit alpha, muscle-specific form;Nascent polypeptide-associated complex subunit alpha	Naca	-0.113027996487087	0.642347724814458		0.924645	1.0815
O88809	Neuronal migration protein doublecortin	Dcx	-0.112491395738392	0.671502841219494		0.924989	1.08109
Q80TM9	Nischarin	Nisch	-0.112408320109051	0.552536081791589		0.925043	1.08103
Q9D338	39S ribosomal protein L19, mitochondrial	Mrpl19	-0.112018585205078	1.21451712759574		0.925293	1.08074
P55288	Cadherin-11	Cdh11	-0.111989551120335	0.103161984368944		0.925311	1.08072
P05202	Aspartate aminotransferase, mitochondrial	Got2	-0.110982047186958	0.523469992332689		0.925958	1.07996
Q9DA03	Complex III assembly factor LYRM7	Lyrm7	-0.110770331488716	0.112208358503178		0.926093	1.0798
P36536	GTP-binding protein SAR1a	Sar1a	-0.110660341050888	0.611149973093762		0.926164	1.07972
Q80TL7	Protein MON2 homolog	Mon2	-0.110548655192058	0.43787687070524		0.926236	1.07964
P62889	60S ribosomal protein L30	Rpl30	-0.110388014051651	0.513270737357865		0.926339	1.07952
O54829	Regulator of G-protein signaling 7	Rgs7	-0.110115898980037	0.471198606611331		0.926514	1.07931
Q9Z1Z2	Serine-threonine kinase receptor-associated protein	Strap	-0.109950171576607	1.36862314074429	+	0.92662	1.07919
Q91YT0	NADH dehydrogenase [ubiquinone] flavoprotein 1, mitochondrial	Ndufv1	-0.109912448459202	0.963141683182126		0.926644	1.07916
Q61771	Kinesin-like protein KIF3B;Kinesin-like protein KIF3B, N-terminally processed	Kif3b	-0.109889348347984	0.412375952720143		0.926659	1.07915
Q6GQT9	Nodal modulator 1	Nomo1	-0.109659830729168	1.49185952563198	+	0.926807	1.07897
Q8C0T5	Signal-induced proliferation-associated 1-like protein 1	Sipa1l1	-0.109338124593098	0.357399002709017		0.927013	1.07873
Q8CIG8	Protein arginine N-methyltransferase 5	Prmt5	-0.109105428059895	0.599318768052		0.927163	1.07856
Q64435;Q62452;P70691;Q63886;Q6ZQM8	UDP-glucuronosyltransferase 1-6;UDP-glucuronosyltransferase 1-9;UDP-glucuronosyltransferase 1-2;UDP-glucuronosyltransferase 1-1;UDP-glucuronosyltransferase 1-7C	Ugt1a6;Ugt1a9;Ugt1a2;Ugt1a1;Ugt1a7c	-0.109011967976887	0.342320338136869		0.927223	1.07849
Q9R0Q3	Transmembrane emp24 domain-containing protein 2	Tmed2	-0.108795589870876	1.31672386132728	+	0.927362	1.07833
Q8BGH4	Receptor expression-enhancing protein 1	Reep1	-0.108681784735786	0.104245335226505		0.927435	1.07824
P12815	Programmed cell death protein 6	Pdcd6	-0.108548694186741	0.84934690362337		0.927521	1.07814
Q99LY9	NADH dehydrogenase [ubiquinone] iron-sulfur protein 5;NADH dehydrogenase [ubiquinone] iron-sulfur protein 5, N-terminally processed	Ndufs5	-0.108546574910481	0.680486851335711		0.927522	1.07814
O88441	Metaxin-2	Mtx2	-0.108327017890083	0.529900682375665		0.927663	1.07798
Q9Z0R4	Intersectin-1	Itsn1	-0.108318752712673	0.546315521233098		0.927668	1.07797
Q8K3J1	NADH dehydrogenase [ubiquinone] iron-sulfur protein 8, mitochondrial	Ndufs8	-0.108313666449654	1.15399236206188		0.927672	1.07797
Q4VAA2	Protein CDV3	Cdv3	-0.107876247829861	0.496357635871194		0.927953	1.07764
Q8VEJ9	Vacuolar protein sorting-associated protein 4A	Vps4a	-0.107714970906574	0.126206056933515		0.928057	1.07752
Q9D1Q6	Endoplasmic reticulum resident protein 44	Erp44	-0.107496685451931	1.1749743860182		0.928197	1.07736
Q8VEA4	Mitochondrial intermembrane space import and assembly protein 40	Chchd4	-0.10718176099989	0.552453683114675		0.9284	1.07712
Q91V41	Ras-related protein Rab-14	Rab14	-0.106643040974934	1.18852475796907		0.928747	1.07672
Q9JKB1;P58321	Ubiquitin carboxyl-terminal hydrolase isozyme L3;Ubiquitin carboxyl-terminal hydrolase isozyme L4	Uchl3;Uchl4	-0.106417338053387	1.03465311733943		0.928892	1.07655
P22892	AP-1 complex subunit gamma-1	Ap1g1	-0.106372621324326	1.05903577102284		0.928921	1.07652
Q99LD9	Translation initiation factor eIF-2B subunit beta	Eif2b2	-0.105942832099068	0.448336133113509		0.929197	1.0762
P63087	Serine/threonine-protein phosphatase PP1-gamma catalytic subunit	Ppp1cc	-0.105640199449329	0.210301221572522		0.929392	1.07597
Q3TPE9	Ankyrin repeat and MYND domain-containing protein 2	Ankmy2	-0.105597813924152	0.721193050572285		0.92942	1.07594
O54901	OX-2 membrane glycoprotein	Cd200	-0.105476379394531	0.313489959859366		0.929498	1.07585
P51150	Ras-related protein Rab-7a	Rab7a	-0.105431026882595	1.92928966056847	+	0.929527	1.07582
Q60875	Rho guanine nucleotide exchange factor 2	Arhgef2	-0.105418523152672	0.422389521360171		0.929535	1.07581
Q3UIU2	NADH dehydrogenase [ubiquinone] 1 beta subcomplex subunit 6	Ndufb6	-0.105195999145508	0.583110285894056		0.929679	1.07564
Q8BK08	Transmembrane protein 11, mitochondrial	Tmem11	-0.105115254720051	0.514821179062707		0.929731	1.07558
Q9CPU4	Microsomal glutathione S-transferase 3	Mgst3	-0.105102962917751	0.470700100793091		0.929739	1.07557
Q9QZE7	Translin-associated protein X	Tsnax	-0.104829152425133	0.599153377598044		0.929915	1.07537
Q920I9	WD repeat-containing protein 7	Wdr7	-0.104806476169163	0.70759130181253		0.92993	1.07535
O09012	Peroxisomal targeting signal 1 receptor	Pex5	-0.104674657185871	0.321569064819838		0.930015	1.07525
Q9DBG3	AP-2 complex subunit beta	Ap2b1	-0.104459126790367	1.19880416558859		0.930154	1.07509
Q6PE01	U5 small nuclear ribonucleoprotein 40 kDa protein	Snrnp40	-0.104424370659725	0.432895266950745		0.930176	1.07507
P52503	NADH dehydrogenase [ubiquinone] iron-sulfur protein 6, mitochondrial	Ndufs6	-0.10408147176107	0.205147555462472		0.930397	1.07481
P18406	Protein CYR61	Cyr61	-0.103863398234047	0.305066757286768		0.930538	1.07465
P61205	ADP-ribosylation factor 3	Arf3	-0.103770785861546	0.815133680575409		0.930597	1.07458
P97797	Tyrosine-protein phosphatase non-receptor type substrate 1	Sirpa	-0.103435728285046	0.485832664590492		0.930814	1.07433
Q8VBT9	Tether containing UBX domain for GLUT4	Aspscr1	-0.103403727213543	0.108707932567575		0.930834	1.07431
P27612	Phospholipase A-2-activating protein	Plaa	-0.103158950805664	1.40597352679705	+	0.930992	1.07412
Q9CQ19	Myosin regulatory light polypeptide 9	Myl9	-0.102785110473633	0.0930032724574359		0.931234	1.07384
Q5RJI5	Serine/threonine-protein kinase BRSK1	Brsk1	-0.102632946438259	0.225042772371074		0.931332	1.07373
Q9Z2H5	Band 4.1-like protein 1	Epb41l1	-0.102582083808048	0.547390771501776		0.931365	1.07369
Q8CIE6	Coatomer subunit alpha;Xenin;Proxenin	Copa	-0.102549658881294	1.22803704675367		0.931386	1.07367
O70251	Elongation factor 1-beta	Eef1b	-0.102366977267796	0.795785305522169		0.931503	1.07353
P20029	78 kDa glucose-regulated protein	Hspa5	-0.102207183837891	2.71470851627776	+	0.931607	1.07341
Q9D358	Low molecular weight phosphotyrosine protein phosphatase	Acp1	-0.102165857950848	1.17501297070222		0.931633	1.07338
Q8K2B3	Succinate dehydrogenase [ubiquinone] flavoprotein subunit, mitochondrial	Sdha	-0.102158652411568	1.51536647374496	+	0.931638	1.07338
Q80TL0	Protein phosphatase 1E	Ppm1e	-0.101918962266708	1.13175376989141		0.931793	1.0732
Q8BR92	Paralemmin-2	Palm2	-0.101861106024845	0.385893351204002		0.93183	1.07316
Q3TZZ7	Extended synaptotagmin-2	Esyt2	-0.10177675882975	0.152535250128835		0.931885	1.07309
P28660	Nck-associated protein 1	Nckap1	-0.10173734029134	0.928493791536334		0.93191	1.07306
P18760	Cofilin-1	Cfl1	-0.101318571302627	1.34719655343469	+	0.932181	1.07275
Q9Z1P6	NADH dehydrogenase [ubiquinone] 1 alpha subcomplex subunit 7	Ndufa7	-0.101146274142796	0.365682176761979		0.932292	1.07263
O54833	Casein kinase II subunit alpha	Csnk2a2	-0.101125293307835	1.25524651706371		0.932306	1.07261
Q6RHR9	Membrane-associated guanylate kinase, WW and PDZ domain-containing protein 1	Magi1	-0.101077185736759	0.368559941419152		0.932337	1.07257
Q9CR21	Acyl carrier protein, mitochondrial	Ndufab1	-0.100828170776367	0.199112368092374		0.932498	1.07239
Q9JL62	Glycolipid transfer protein	Gltp	-0.100698047214085	0.147275797280288		0.932582	1.07229
Q9DB10	Essential MCU regulator, mitochondrial	Smdt1	-0.100588480631512	0.145622281783424		0.932652	1.07221
Q9D0I9	Arginine--tRNA ligase, cytoplasmic	Rars	-0.100524690416123	0.610878718616627		0.932694	1.07216
Q2NL51	Glycogen synthase kinase-3 alpha	Gsk3a	-0.100522571139866	0.665203784172683		0.932695	1.07216
O55123;P28862	Stromelysin-2;Stromelysin-1	Mmp10;Mmp3	-0.100301742553711	0.0867540979423579		0.932838	1.072
Q91VR2	ATP synthase subunit gamma, mitochondrial	Atp5c1	-0.100264867146812	0.705171213948178		0.932862	1.07197
Q9CPX6	Ubiquitin-like-conjugating enzyme ATG3	Atg3	-0.100095325046116	0.481007301122921		0.932971	1.07184
Q99JX4	Eukaryotic translation initiation factor 3 subunit M	Eif3m	-0.0995975070529518	0.389400675643759		0.933293	1.07147
P97351	40S ribosomal protein S3a	Rps3a	-0.0995655059814453	0.743241831850675		0.933314	1.07145
O54988	STE20-like serine/threonine-protein kinase	Slk	-0.099366505940754	0.616386351530174		0.933443	1.0713
P70336	Rho-associated protein kinase 2	Rock2	-0.0990973578559	1.14199929819093		0.933617	1.0711
P47911	60S ribosomal protein L6	Rpl6	-0.0990681118435326	0.726129809603625		0.933636	1.07108
Q3TVI8	Pre-B-cell leukemia transcription factor-interacting protein 1	Pbxip1	-0.098725636800129	0.274008853700568		0.933858	1.07083
Q8BY89	Choline transporter-like protein 2	Slc44a2	-0.0987216101752395	0.134734958771819		0.93386	1.07082
Q8BHH2	Ras-related protein Rab-9B	Rab9b	-0.0986603630913656	0.240916422075024		0.9339	1.07078
P62852	40S ribosomal protein S25	Rps25	-0.0985643598768426	0.370729080398388		0.933962	1.07071
Q8CCN5	Breast carcinoma-amplified sequence 3 homolog	Bcas3	-0.0984079572889556	0.273451069189545		0.934063	1.07059
Q8BHG2	UPF0587 protein C1orf123 homolog		-0.0983740488688127	0.188556655692428		0.934085	1.07057
Q61831	Mitogen-activated protein kinase 10	Mapk10	-0.0982509189181862	0.686945147525915		0.934165	1.07047
C0HK80;C0HK79			-0.0981633928087042	0.492559254334389		0.934222	1.07041
Q8VE11	Myotubularin-related protein 6	Mtmr6	-0.0978455013698998	0.205272357168441		0.934427	1.07017
Q8BTM8	Filamin-A	Flna	-0.0975602467854806	0.151116827120771		0.934612	1.06996
Q99K85	Phosphoserine aminotransferase	Psat1	-0.0975530412462007	0.37121794883405		0.934617	1.06996
Q6P3A8	2-oxoisovalerate dehydrogenase subunit beta, mitochondrial	Bckdhb	-0.0971811082628022	0.562966540569818		0.934858	1.06968
Q9CXT8	Mitochondrial-processing peptidase subunit beta	Pmpcb	-0.0968479580349424	0.35407705004212		0.935074	1.06943
P19157;P46425	Glutathione S-transferase P 1;Glutathione S-transferase P 2	Gstp1;Gstp2	-0.0968286726209833	1.05390005356714		0.935086	1.06942
O08688	Calpain-5	Capn5	-0.0967097812228737	0.433976897652658		0.935163	1.06933
P61759	Prefoldin subunit 3	Vbp1	-0.0963653988308373	0.513216252847933		0.935387	1.06908
Q9DB41	Mitochondrial glutamate carrier 2	Slc25a18	-0.0962087843153228	0.256409276199206		0.935488	1.06896
Q91V01	Lysophospholipid acyltransferase 5	Lpcat3	-0.0961867438422317	0.341808064055128		0.935502	1.06894
Q9ER88	28S ribosomal protein S29, mitochondrial	Dap3	-0.0959169599744989	0.190318846511293		0.935677	1.06874
Q9CR68	Cytochrome b-c1 complex subunit Rieske, mitochondrial;Cytochrome b-c1 complex subunit 11	Uqcrfs1	-0.0958781772189674	0.850550331082053		0.935703	1.06872
P70399	Tumor suppressor p53-binding protein 1	Tp53bp1	-0.0957970089382592	0.530063890352432		0.935755	1.06866
Q9CQ54	NADH dehydrogenase [ubiquinone] 1 subunit C2	Ndufc2	-0.0957768758138009	0.49211294387807		0.935768	1.06864
Q80U63	Mitofusin-2	Mfn2	-0.0953943464491118	0.20216369162634		0.936016	1.06836
Q8R1I1	Cytochrome b-c1 complex subunit 9	Uqcr10	-0.0953869289822045	0.226366147532517		0.936021	1.06835
Q60902	Epidermal growth factor receptor substrate 15-like 1	Eps15l1	-0.0950690375434036	1.28101629332769		0.936227	1.06812
O89001	Carboxypeptidase D	Cpd	-0.0950272878011056	0.468275769238723		0.936255	1.06809
Q9QZX7	Serine racemase	Srr	-0.0948954688178141	0.59173612762603		0.93634	1.06799
Q7TNS2	MICOS complex subunit Mic10	Minos1	-0.0945394304063569	0.163569118184537		0.936571	1.06772
Q9CZM2	60S ribosomal protein L15	Rpl15	-0.0943709479437942	0.786104750842027		0.936681	1.0676
P12849	cAMP-dependent protein kinase type I-beta regulatory subunit	Prkar1b	-0.0936113993326835	0.96186877207273		0.937174	1.06704
Q922S4	cGMP-dependent 3,5-cyclic phosphodiesterase	Pde2a	-0.0935732523600237	0.392831574131339		0.937199	1.06701
Q60864	Stress-induced-phosphoprotein 1	Stip1	-0.0935509999593087	1.55596372295116	+	0.937213	1.06699
Q4VBD2	Transmembrane anterior posterior transformation protein 1	Tapt1	-0.0934234195285377	0.185539728615011		0.937296	1.0669
Q8BGG7	Ubiquitin-associated and SH3 domain-containing protein B	Ubash3b	-0.0932725270589181	0.190412919435622		0.937394	1.06679
O35710	Nocturnin	Ccrn4l	-0.0926547580295107	0.0815078195340514		0.937795	1.06633
Q9D855	Cytochrome b-c1 complex subunit 7	Uqcrb	-0.0924286312527123	0.615992288343216		0.937942	1.06616
O88986	2-amino-3-ketobutyrate coenzyme A ligase, mitochondrial	Gcat	-0.0923366546630859	0.125058487441043		0.938002	1.0661
Q3UBG2	PTB-containing, cubilin and LRP1-interacting protein	Pid1	-0.0921230316162109	0.351695312196755		0.938141	1.06594
O55234	Proteasome subunit beta type-5	Psmb5	-0.0919742584228516	0.742985182275543		0.938238	1.06583
Q9DB60	Prostamide/prostaglandin F synthase	Fam213b	-0.0919628143310547	0.320102395705425		0.938245	1.06582
Q9WTP6	Adenylate kinase 2, mitochondrial;Adenylate kinase 2, mitochondrial, N-terminally processed	Ak2	-0.0919191572401274	0.0574645421091383		0.938274	1.06579
Q8BRK8	5-AMP-activated protein kinase catalytic subunit alpha-2	Prkaa2	-0.0919038984510614	0.231505201493679		0.938284	1.06578
P61294	Ras-related protein Rab-6B	Rab6b	-0.0914692348904076	0.472868697005027		0.938566	1.06545
Q5SSZ5	Tensin-3	Tns3	-0.0913126203748931	0.145192383626403		0.938668	1.06534
Q9DC16	Endoplasmic reticulum-Golgi intermediate compartment protein 1	Ergic1	-0.0910438961452904	0.903899397641724		0.938843	1.06514
P14148	60S ribosomal protein L7	Rpl7	-0.090862062242298	0.771440886443504		0.938962	1.06501
Q91VR7	Microtubule-associated proteins 1A/1B light chain 3A	Map1lc3a	-0.090862062242298	0.104994574185226		0.938962	1.06501
Q9CQQ7	ATP synthase F(0) complex subunit B1, mitochondrial	Atp5f1	-0.0903180440266951	0.544747541859562		0.939316	1.0646
Q60592	Microtubule-associated serine/threonine-protein kinase 2	Mast2	-0.0902699364556234	0.222265722922973		0.939347	1.06457
Q9QZE5	Coatomer subunit gamma-1	Copg1	-0.0902048746744804	0.615720287634836		0.939389	1.06452
Q3UE37	Ubiquitin-conjugating enzyme E2 Z	Ube2z	-0.0901160769992408	0.257620276029928		0.939447	1.06446
P22005	Proenkephalin-A;Synenkephalin;Met-enkephalin;PENK(114-133);PENK(143-184);Met-enkephalin-Arg-Ser-Leu;Leu-enkephalin;PENK(238-259);Met-enkephalin-Arg-Phe	Penk	-0.0900707244873047	0.102637847635552		0.939477	1.06442
Q9Z2U0	Proteasome subunit alpha type-7	Psma7	-0.0897776285807268	1.62242739186091	+	0.939668	1.06421
Q9R1Z8	Vinexin	Sorbs3	-0.0895527733696859	0.055356172754709		0.939814	1.06404
Q8BNU0	Armadillo repeat-containing protein 6	Armc6	-0.0894249810112839	0.431419207445372		0.939897	1.06395
Q3TCH7	Cullin-4A	Cul4a	-0.0893423292371942	0.383659834367141		0.939951	1.06389
P63028	Translationally-controlled tumor protein	Tpt1	-0.0893376668294259	1.07873528239748		0.939954	1.06388
P35585	AP-1 complex subunit mu-1	Ap1m1	-0.0890920427110444	1.00930660581089		0.940114	1.0637
Q8R4H2	Rho guanine nucleotide exchange factor 12	Arhgef12	-0.0890647040473098	0.26323118969375		0.940132	1.06368
Q9Z1Z0	General vesicular transport factor p115	Uso1	-0.0885459052191813	1.34563381951005	+	0.94047	1.0633
O08989	Ras-related protein M-Ras	Mras	-0.0884393056233712	0.230976613396136		0.94054	1.06322
Q9CQZ5	NADH dehydrogenase [ubiquinone] 1 alpha subcomplex subunit 6	Ndufa6	-0.0883818732367629	0.588542463316277		0.940577	1.06318
O54734	Dolichyl-diphosphooligosaccharide--protein glycosyltransferase 48 kDa subunit	Ddost	-0.0882214440239792	0.605708746216402		0.940682	1.06306
P62843	40S ribosomal protein S15	Rps15	-0.0881137847900391	0.306002436878393		0.940752	1.06298
P23591	GDP-L-fucose synthase	Tsta3	-0.0880141788058815	0.591394561116677		0.940817	1.06291
Q9CR00	26S proteasome non-ATPase regulatory subunit 9	Psmd9	-0.0874099731445313	0.38283960273976		0.941211	1.06246
Q5XJY5	Coatomer subunit delta	Arcn1	-0.0870931413438605	0.745203288272242		0.941418	1.06223
Q9CXY6	Interleukin enhancer-binding factor 2	Ilf2	-0.0868339538574219	0.673374788535777		0.941587	1.06204
Q9CZW4	Long-chain-fatty-acid--CoA ligase 3	Acsl3	-0.0867472754584426	0.38152183102097		0.941643	1.06197
Q9CZ13	Cytochrome b-c1 complex subunit 1, mitochondrial	Uqcrc1	-0.0866637759738502	2.25225855618113	+	0.941698	1.06191
Q9CY58	Plasminogen activator inhibitor 1 RNA-binding protein	Serbp1	-0.0865703158908424	0.650737241441054		0.941759	1.06184
P62270	40S ribosomal protein S18	Rps18	-0.086536619398327	0.421804849237767		0.941781	1.06182
Q7TME0	Lipid phosphate phosphatase-related protein type 4	Lppr4	-0.0861220889621315	0.398459871829363		0.942052	1.06151
Q91Y13;Q91Y20;O88689	Protocadherin alpha-10;Protocadherin alpha-4	Pcdha7;Pcdha10;Pcdha4	-0.0859044392903634	0.247717645210219		0.942194	1.06135
Q9CYZ2	Tumor protein D54	Tpd52l2	-0.0859033796522368	0.355637725536359		0.942194	1.06135
Q8C167	Prolyl endopeptidase-like	Prepl	-0.0856427086724167	0.601999444091501		0.942365	1.06116
P63158	High mobility group protein B1	Hmgb1	-0.0856187608506964	0.53318790124221		0.94238	1.06114
Q91VH6	Protein MEMO1	Memo1	-0.0853341420491525	0.220950192262277		0.942566	1.06093
Q9JKF1	Ras GTPase-activating-like protein IQGAP1	Iqgap1	-0.0851374732123489	0.14853115303198		0.942695	1.06079
Q9JHK4	Geranylgeranyl transferase type-2 subunit alpha	Rabggta	-0.0849306318495024	0.47737823679065		0.94283	1.06064
Q3UH60	Disco-interacting protein 2 homolog B	Dip2b	-0.0847551557752801	0.417710883967802		0.942945	1.06051
P20444	Protein kinase C alpha type	Prkca	-0.0845849778917085	0.449242790956353		0.943056	1.06038
Q9Z1T1	AP-3 complex subunit beta-1	Ap3b1	-0.0842596689860038	0.275707798948391		0.943268	1.06014
P10630	Eukaryotic initiation factor 4A-II;Eukaryotic initiation factor 4A-II, N-terminally processed	Eif4a2	-0.0841055976019973	0.616871022285233		0.943369	1.06003
Q8BVU5	ADP-ribose pyrophosphatase, mitochondrial	Nudt9	-0.0837497711181641	0.112922490010507		0.943602	1.05977
Q6A068	Cell division cycle 5-like protein	Cdc5l	-0.083430820041233	0.146548533205226		0.943811	1.05953
P63242	Eukaryotic translation initiation factor 5A-1	Eif5a	-0.0830622778998453	1.06620421562614		0.944052	1.05926
Q6P069	Sorcin	Sri	-0.0829260084364165	0.620647072129638		0.944141	1.05916
Q9QZB7	Actin-related protein 10	Actr10	-0.0827526516384545	0.870615519874084		0.944254	1.05904
P47746	Cannabinoid receptor 1	Cnr1	-0.0824830796983527	0.0551058597935963		0.944431	1.05884
Q99L04	Dehydrogenase/reductase SDR family member 1	Dhrs1	-0.0821232265896263	0.381380395300015		0.944666	1.05857
Q8K1X1	WD repeat-containing protein 11	Wdr11	-0.0817368825276681	0.147368355429143		0.944919	1.05829
Q9Z2G6	Protein sel-1 homolog 1	Sel1l	-0.0817226833767357	0.0713058743581489		0.944929	1.05828
P17182	Alpha-enolase	Eno1	-0.0816650390625	0.844638510971632		0.944966	1.05824
Q9DCM0	Persulfide dioxygenase ETHE1, mitochondrial	Ethe1	-0.0810612572564011	0.260944503154105		0.945362	1.0578
P67984	60S ribosomal protein L22	Rpl22	-0.0808311038547096	0.787786615435808		0.945513	1.05763
Q8BL99	Protein dopey-1	Dopey1	-0.080644183688694	0.153097096558043		0.945635	1.05749
O35465	Peptidyl-prolyl cis-trans isomerase FKBP8	Fkbp8	-0.0802641974555094	0.464412772765937		0.945884	1.05721
P63017	Heat shock cognate 71 kDa protein	Hspa8	-0.0801344977484817	0.971504280766228		0.945969	1.05712
Q3UVG3	Protein FAM91A1	Fam91a1	-0.0800993177625848	0.0906250293023549		0.945993	1.05709
Q9D1G1	Ras-related protein Rab-1B	Rab1b	-0.0800397660997163	0.901971816789068		0.946032	1.05705
Q9QYG0	Protein NDRG2	Ndrg2	-0.079865773518879	0.537567778165762		0.946146	1.05692
Q6ZQ18	Protein EFR3 homolog B	Efr3b	-0.0795680152045328	0.250540605209101		0.946341	1.0567
Q8VI75	Importin-4	Ipo4	-0.0792797936333542	0.600396873903732		0.94653	1.05649
P50580	Proliferation-associated protein 2G4	Pa2g4	-0.0790911780463297	1.33302569089136	+	0.946654	1.05635
P60487	Pyridoxal phosphate phosphatase	Pdxp	-0.0790485805935326	0.357510979854332		0.946682	1.05632
P48678	Prelamin-A/C;Lamin-A/C	Lmna	-0.0789676242404518	0.442530627902189		0.946735	1.05626
Q9D1L9	Ragulator complex protein LAMTOR5	Lamtor5	-0.0789563920762788	0.323429220313342		0.946742	1.05625
Q9R045;Q640P2	Angiopoietin-related protein 2;Angiopoietin-related protein 1	Angptl2;Angptl1	-0.0788940853542748	0.120029424947442		0.946783	1.05621
Q8C1A5	Thimet oligopeptidase	Thop1	-0.0787351396348761	0.615004985713333		0.946887	1.05609
Q8R0S2	IQ motif and SEC7 domain-containing protein 1	Iqsec1	-0.0785751342773438	0.47291939592865		0.946992	1.05597
O35127	Protein C10	Grcc10	-0.0785437689887125	0.469130407686243		0.947013	1.05595
P47941	Crk-like protein	Crkl	-0.078407923380535	0.33461260719846		0.947102	1.05585
Q9Z0P5	Twinfilin-2	Twf2	-0.07817776997884	0.485028908946455		0.947253	1.05568
Q9DAM7	Transmembrane protein 263	Tmem263	-0.0780853695339658	0.247368340141843		0.947314	1.05562
Q9D8N0	Elongation factor 1-gamma	Eef1g	-0.0777411990695533	1.20236764873834		0.94754	1.05536
P11214	Tissue-type plasminogen activator;Tissue-type plasminogen activator chain A;Tissue-type plasminogen activator chain B	Plat	-0.0777024163140219	0.128391682375011		0.947566	1.05534
P59108	Copine-2	Cpne2	-0.077460394965275	0.270572138587467		0.947724	1.05516
Q9D6J6	NADH dehydrogenase [ubiquinone] flavoprotein 2, mitochondrial	Ndufv2	-0.0774076249864351	0.472618840620912		0.947759	1.05512
Q9Z268	RasGAP-activating-like protein 1	Rasal1	-0.0772005716959647	0.154261202778225		0.947895	1.05497
Q9CZG3	COMM domain-containing protein 8	Commd8	-0.0771810743543817	0.267847836105818		0.947908	1.05495
E9Q735	Ubiquitin conjugation factor E4 A	Ube4a	-0.0771522521972656	0.239835049009675		0.947927	1.05493
Q9CQ48	NudC domain-containing protein 2	Nudcd2	-0.0771473778618699	0.288955615809381		0.94793	1.05493
O35459	Delta(3,5)-Delta(2,4)-dienoyl-CoA isomerase, mitochondrial	Ech1	-0.0771308475070533	0.188000105048598		0.947941	1.05492
Q64310	Surfeit locus protein 4	Surf4	-0.0769742329915353	0.425913000580874		0.948044	1.0548
Q8BFQ8	Parkinson disease 7 domain-containing protein 1	Pddc1	-0.076890521579319	0.219488390681809		0.948099	1.05474
Q80VL1	Tudor and KH domain-containing protein	Tdrkh	-0.0761737823486328	0.135450286336628		0.94857	1.05422
P12970	60S ribosomal protein L7a	Rpl7a	-0.0759968227810326	0.403043328784608		0.948686	1.05409
Q7TSI3	Serine/threonine-protein phosphatase 6 regulatory subunit 1	Ppp6r1	-0.0756744808620873	0.125488570852877		0.948898	1.05385
P83882	60S ribosomal protein L36a	Rpl36a	-0.0756615532769089	0.042908550514258		0.948907	1.05384
Q61545	RNA-binding protein EWS	Ewsr1	-0.0756513807508661	0.398804713517529		0.948914	1.05384
Q3UMR5	Calcium uniporter protein, mitochondrial	Mcu	-0.075650533040367	0.367371406611605		0.948914	1.05384
Q5DQR4	Syntaxin-binding protein 5-like	Stxbp5l	-0.0756229824490013	0.361872119145466		0.948932	1.05382
P84091	AP-2 complex subunit mu	Ap2m1	-0.0755479600694429	0.424117950175947		0.948982	1.05376
Q922R8	Protein disulfide-isomerase A6	Pdia6	-0.0754636128743513	1.00943836002084		0.949037	1.0537
Q6PEB6	MOB-like protein phocein	Mob4	-0.075413174099392	0.242813644301035		0.94907	1.05366
P70271	PDZ and LIM domain protein 4	Pdlim4	-0.0751912858751069	0.282675294945144		0.949216	1.0535
Q3U0M1	Trafficking protein particle complex subunit 9	Trappc9	-0.0749367607964402	0.11505355274795		0.949384	1.05331
P50516	V-type proton ATPase catalytic subunit A	Atp6v1a	-0.0748574998643647	0.698785835970115		0.949436	1.05326
Q9D967	Magnesium-dependent phosphatase 1	Mdp1	-0.0746476915147554	0.230587212912892		0.949574	1.0531
Q8CAQ8	MICOS complex subunit Mic60	Immt	-0.0745315551757813	2.57656451111409	+	0.94965	1.05302
Q71LX4	Talin-2	Tln2	-0.0744321611192511	0.545499698924905		0.949716	1.05295
Q80TV8	CLIP-associating protein 1	Clasp1	-0.0743664635552292	0.310084136146135		0.949759	1.0529
Q03958	Prefoldin subunit 6	Pfdn6	-0.0742683410644531	0.514604304753285		0.949824	1.05283
Q9CYS6	Uncharacterized protein C2orf72 homolog		-0.0741746690538214	0.111672576337817		0.949885	1.05276
P56695	Wolframin	Wfs1	-0.0739947424994547	0.213772312648523		0.950004	1.05263
Q8BZW8	NHL repeat-containing protein 2	Nhlrc2	-0.0738923814561616	0.166619374802038		0.950071	1.05255
Q9DB20	ATP synthase subunit O, mitochondrial	Atp5o	-0.0738476647271042	1.22799033077471		0.950101	1.05252
Q60865	Caprin-1	Caprin1	-0.0738362206353074	0.561410584473767		0.950108	1.05251
Q8K1A6	Coiled-coil and C2 domain-containing protein 1A	Cc2d1a	-0.0737518734402123	0.192218458130291		0.950164	1.05245
P35285	Ras-related protein Rab-22A	Rab22a	-0.0736141204833984	0.139765856065367		0.950255	1.05235
P63040	Complexin-1	Cplx1	-0.0734793345133475	0.366059640685966		0.950343	1.05225
Q8BHL3	TBC1 domain family member 10B	Tbc1d10b	-0.0733708275689011	0.133540126961455		0.950415	1.05217
Q9WTS4	Teneurin-1;Ten-1 intracellular domain;Teneurin C-terminal-associated peptide	Tenm1	-0.0733186933729399	0.187437726235512		0.950449	1.05213
Q9CPY7	Cytosol aminopeptidase	Lap3	-0.0729927486843529	0.334535335284135		0.950664	1.0519
Q4KUS2	Protein unc-13 homolog A	Unc13a	-0.0729677412244989	0.264789597115306		0.95068	1.05188
P62855	40S ribosomal protein S26	Rps26	-0.0728499094645194	0.352728288753521		0.950758	1.05179
Q60899	ELAV-like protein 2	Elavl2	-0.0726632012261277	0.124168283000838		0.950881	1.05166
Q9CQJ8	NADH dehydrogenase [ubiquinone] 1 beta subcomplex subunit 9	Ndufb9	-0.0726159413655623	0.36917549132955		0.950912	1.05162
Q8R001	Microtubule-associated protein RP/EB family member 2	Mapre2	-0.0724173651801223	0.603642152656845		0.951043	1.05148
Q91WQ3	Tyrosine--tRNA ligase, cytoplasmic;Tyrosine--tRNA ligase, cytoplasmic, N-terminally processed	Yars	-0.0721321105957031	0.399079558656297		0.951231	1.05127
P63213	Guanine nucleotide-binding protein G(I)/G(S)/G(O) subunit gamma-2	Gng2	-0.0721278720431862	0.217145466314109		0.951234	1.05127
Q9R078	5-AMP-activated protein kinase subunit beta-1	Prkab1	-0.071925693088108	0.241019301662133		0.951367	1.05112
Q6ZQI3	Malectin	Mlec	-0.0718790690104179	0.340332467961726		0.951398	1.05108
P24638	Lysosomal acid phosphatase	Acp2	-0.07176907857259	0.367462997495671		0.951471	1.051
P84099	60S ribosomal protein L19	Rpl19	-0.0715787675645636	0.351335761607456		0.951596	1.05087
Q91V14	Solute carrier family 12 member 5	Slc12a5	-0.0714668697781029	0.501084906120857		0.95167	1.05078
Q9WUP7	Ubiquitin carboxyl-terminal hydrolase isozyme L5	Uchl5	-0.071014404296875	0.43059682112723		0.951968	1.05046
Q99KN9	Clathrin interactor 1	Clint1	-0.0707903967963333	0.36739291712742		0.952116	1.05029
Q64105	Sepiapterin reductase	Spr	-0.0707102881537551	0.359609922752863		0.952169	1.05023
Q3UNH4	G protein-regulated inducer of neurite outgrowth 1	Gprin1	-0.0706539154052734	0.402679836466012		0.952206	1.05019
Q920Q4	Vacuolar protein sorting-associated protein 16 homolog	Vps16	-0.0704989963107607	0.200030857935295		0.952309	1.05008
Q64674	Spermidine synthase	Srm	-0.070485856797962	0.817700573087449		0.952317	1.05007
P17427	AP-2 complex subunit alpha-2	Ap2a2	-0.0703591240776902	0.490701870824451		0.952401	1.04998
Q9JHQ5	Leucine zipper transcription factor-like protein 1	Lztfl1	-0.0701929728190116	0.13277433098982		0.952511	1.04986
Q9R1J0	Sterol-4-alpha-carboxylate 3-dehydrogenase, decarboxylating	Nsdhl	-0.0701096852620431	0.246778160068665		0.952566	1.0498
Q91VA6	Polymerase delta-interacting protein 2	Poldip2	-0.0700789557562942	0.0866276824924067		0.952586	1.04977
Q8BFR5	Elongation factor Tu, mitochondrial	Tufm	-0.0700325436062279	1.28472914416079		0.952617	1.04974
Q9DC69	NADH dehydrogenase [ubiquinone] 1 alpha subcomplex subunit 9, mitochondrial	Ndufa9	-0.0700147416856538	0.53108469058001		0.952628	1.04973
P30275	Creatine kinase U-type, mitochondrial	Ckmt1	-0.0696421729193801	0.459358065197232		0.952874	1.04946
Q99JX3	Golgi reassembly-stacking protein 2	Gorasp2	-0.0693726009792748	0.38079548521905		0.953052	1.04926
O08586	Phosphatidylinositol 3,4,5-trisphosphate 3-phosphatase and dual-specificity protein phosphatase PTEN	Pten	-0.0692575242784272	0.213502674555121		0.953128	1.04918
Q9Z1G3	V-type proton ATPase subunit C 1	Atp6v1c1	-0.0691926744249116	0.642265474900937		0.953171	1.04913
Q8BH66	Atlastin-1	Atl1	-0.0691803826226156	0.405079235994907		0.953179	1.04912
P35441	Thrombospondin-1	Thbs1	-0.0690867106119804	0.104216277730204		0.953241	1.04905
Q6R891	Neurabin-2	Ppp1r9b	-0.0687397850884324	0.619581138583274		0.953471	1.0488
Q3V0G7	GTPase-activating Rap/Ran-GAP domain-like protein 3	Garnl3	-0.0686918894449882	0.227135885962435		0.953502	1.04877
O09172	Glutamate--cysteine ligase regulatory subunit	Gclm	-0.0685136583116339	0.0890326204735536		0.95362	1.04864
Q9QXK3	Coatomer subunit gamma-2	Copg2	-0.0683998531765404	0.55321470155082		0.953695	1.04855
Q99KV1	DnaJ homolog subfamily B member 11	Dnajb11	-0.067875332302517	0.541678579334041		0.954042	1.04817
Q8K0D7	Tail-anchored protein insertion receptor WRB	Wrb	-0.0677464803059884	0.175314982077271		0.954127	1.04808
Q9CQF9	Prenylcysteine oxidase	Pcyox1	-0.0676320393880196	0.726866443997398		0.954203	1.048
P62814	V-type proton ATPase subunit B, brain isoform	Atp6v1b2	-0.0675118764241525	0.660534391878294		0.954282	1.04791
P62245	40S ribosomal protein S15a	Rps15a	-0.0673264397515183	0.341085824146443		0.954405	1.04777
Q68FL6	Methionine--tRNA ligase, cytoplasmic	Mars	-0.0672836303710938	0.406956447183562		0.954433	1.04774
Q8JZS0	Protein lin-7 homolog A	Lin7a	-0.067205217149521	0.310102766797216		0.954485	1.04769
P62918	60S ribosomal protein L8	Rpl8	-0.0672037336561431	0.504331330645217		0.954486	1.04768
P62830	60S ribosomal protein L23	Rpl23	-0.0670466952853737	0.169130082771917		0.95459	1.04757
Q9QXS1	Plectin	Plec	-0.0669106377495652	0.387785310805459		0.95468	1.04747
P62484	Abl interactor 2	Abi2	-0.0669102138943174	0.244213810751731		0.95468	1.04747
O88712	C-terminal-binding protein 1	Ctbp1	-0.0667631361219634	1.1583752818412		0.954778	1.04736
Q9R0N7	Synaptotagmin-7	Syt7	-0.066578123304577	0.248343377111281		0.9549	1.04723
P62071	Ras-related protein R-Ras2	Rras2	-0.0661334991455078	0.35523025567284		0.955195	1.04691
P31230	Aminoacyl tRNA synthase complex-interacting multifunctional protein 1;Endothelial monocyte-activating polypeptide 2	Aimp1	-0.0660133361816406	0.425319386033926		0.955274	1.04682
Q9JM13	Rab5 GDP/GTP exchange factor	Rabgef1	-0.0659283532036703	0.183333400876097		0.95533	1.04676
Q80W54	CAAX prenyl protease 1 homolog	Zmpste24	-0.0656505160861549	0.226102698578357		0.955514	1.04656
Q9CQR6	Serine/threonine-protein phosphatase 6 catalytic subunit;Serine/threonine-protein phosphatase 6 catalytic subunit, N-terminally processed	Ppp6c	-0.0656361050075951	0.599092945176604		0.955524	1.04655
Q8BIZ1	Ankyrin repeat and sterile alpha motif domain-containing protein 1B	Anks1b	-0.0656242370605469	0.211394101059579		0.955532	1.04654
Q99MI1	ELKS/Rab6-interacting/CAST family member 1	Erc1	-0.0655621422661667	0.370525534511377		0.955573	1.04649
Q9DB77	Cytochrome b-c1 complex subunit 2, mitochondrial	Uqcrc2	-0.06537691752116	0.948968749620452		0.955696	1.04636
O88848	ADP-ribosylation factor-like protein 6	Arl6	-0.0652442508273658	0.229257749903114		0.955783	1.04626
Q80W47	WD repeat domain phosphoinositide-interacting protein 2	Wipi2	-0.0651423136393205	0.363381687756135		0.955851	1.04619
P35279	Ras-related protein Rab-6A	Rab6a	-0.0649407704671248	0.291174986254009		0.955985	1.04604
Q8BP47	Asparagine--tRNA ligase, cytoplasmic	Nars	-0.0648487938774949	0.470871704988761		0.956046	1.04598
Q9QUP5	Hyaluronan and proteoglycan link protein 1	Hapln1	-0.06463623046875	0.339441540000976		0.956186	1.04582
Q99J45	Nuclear receptor-binding protein	Nrbp1	-0.064440621270073	0.232747317732502		0.956316	1.04568
Q9Z2I0	LETM1 and EF-hand domain-containing protein 1, mitochondrial	Letm1	-0.0642768012152786	0.420584813814169		0.956425	1.04556
P63054	Purkinje cell protein 4	Pcp4	-0.064149220784504	0.29939512805664		0.956509	1.04547
Q9JIF7	Coatomer subunit beta	Copb1	-0.0640199449327277	0.800429463455158		0.956595	1.04537
Q99KJ8	Dynactin subunit 2	Dctn2	-0.0637838575575067	0.57128142909813		0.956751	1.0452
Q5F2E8	Serine/threonine-protein kinase TAO1	Taok1	-0.0635439554850237	0.484070024687257		0.956911	1.04503
Q3UZ39	Leucine-rich repeat flightless-interacting protein 1	Lrrfip1	-0.0633816189236107	0.1184157142327		0.957018	1.04491
Q00493	Carboxypeptidase E	Cpe	-0.0632892184787295	0.238442271567994		0.95708	1.04485
Q3TBW2	39S ribosomal protein L10, mitochondrial	Mrpl10	-0.0631557040744326	0.203106512911201		0.957168	1.04475
Q5DTY9	BTB/POZ domain-containing protein KCTD16	Kctd16	-0.0629412333170585	0.0632820391402512		0.95731	1.04459
Q3UEB3	Poly(U)-binding-splicing factor PUF60	Puf60	-0.062738630506729	0.385278094979987		0.957445	1.04445
Q9D906	Ubiquitin-like modifier-activating enzyme ATG7	Atg7	-0.0627310011121942	0.225291343354904		0.95745	1.04444
Q8C7D2	Protein cereblon	Crbn	-0.0626155005560989	0.0944831536191443		0.957527	1.04436
Q9ERE7	LDLR chaperone MESD	Mesdc2	-0.0622306399875221	0.669548121813141		0.957782	1.04408
Q9D023	Mitochondrial pyruvate carrier 2	Mpc2	-0.0618998209635393	0.258722848436031		0.958002	1.04384
A6H611	Mitochondrial intermediate peptidase	Mipep	-0.0618845621744804	0.236944080501334		0.958012	1.04383
P06837	Neuromodulin	Gap43	-0.0617930094401018	0.108097811258223		0.958073	1.04376
Q9D8V0	Minor histocompatibility antigen H13	Hm13	-0.0615450541178397	0.195415079203413		0.958237	1.04358
Q8R1B4	Eukaryotic translation initiation factor 3 subunit C	Eif3c	-0.0613413916693801	0.780920337685925		0.958373	1.04344
Q9JJI8	60S ribosomal protein L38	Rpl38	-0.0612456003824882	0.139513276665674		0.958436	1.04337
Q9CWX2	Complex I intermediate-associated protein 30, mitochondrial	Ndufaf1	-0.061187744140625	0.257912739965852		0.958475	1.04332
D3YVF0	A-kinase anchor protein 5	Akap5	-0.0608223809136277	0.40748724391064		0.958717	1.04306
Q62167;P16381	ATP-dependent RNA helicase DDX3X;Putative ATP-dependent RNA helicase Pl10	Ddx3x;D1Pas1	-0.0604958004421654	0.636298018488208		0.958935	1.04282
Q8CBE3	WD repeat-containing protein 37	Wdr37	-0.0602726406521263	0.32985880563718		0.959083	1.04266
O35326	Serine/arginine-rich splicing factor 5	Srsf5	-0.0596131218804246	0.176752945251953		0.959521	1.04219
Q9JKF6	Nectin-1	Pvrl1	-0.0591930813259545	0.206137347978883		0.959801	1.04188
P15209	BDNF/NT-3 growth factors receptor	Ntrk2	-0.0591805775960275	0.270064903582795		0.959809	1.04187
O35609	Secretory carrier-associated membrane protein 3	Scamp3	-0.0588548448350714	0.443943484565215		0.960026	1.04164
O35643	AP-1 complex subunit beta-1	Ap1b1	-0.058599260118271	0.574231315751876		0.960196	1.04145
Q9CQI7	U2 small nuclear ribonucleoprotein B	Snrpb2	-0.0581279330783424	0.0474752511325745		0.96051	1.04111
Q5U458	DnaJ homolog subfamily C member 11	Dnajc11	-0.0579770406087228	0.253097312280174		0.96061	1.04101
P21126	Ubiquitin-like protein 4A	Ubl4a	-0.0579511854383661	0.181364652845871		0.960627	1.04099
P97855	Ras GTPase-activating protein-binding protein 1	G3bp1	-0.0578893025716134	0.614117529013524		0.960669	1.04094
Q641P0	Actin-related protein 3B	Actr3b	-0.0577966901991118	0.185869342768584		0.96073	1.04087
Q80XN0	D-beta-hydroxybutyrate dehydrogenase, mitochondrial	Bdh1	-0.0575894249810105	0.270330939453779		0.960868	1.04073
Q8R127	Saccharopine dehydrogenase-like oxidoreductase	Sccpdh	-0.057550642225479	0.1928164817864		0.960894	1.0407
Q8K009	Mitochondrial 10-formyltetrahydrofolate dehydrogenase	Aldh1l2	-0.0574843088785784	0.0474944949390132		0.960938	1.04065
P17156	Heat shock-related 70 kDa protein 2	Hspa2	-0.057363086276581	0.284494275249627		0.961019	1.04056
Q9DCS2	UPF0585 protein C16orf13 homolog		-0.0572473737928583	0.0271893378650635		0.961096	1.04048
Q8BHN3	Neutral alpha-glucosidase AB	Ganab	-0.0570288764105911	0.673457930207456		0.961242	1.04032
B9EJ86	Oxysterol-binding protein	Osbpl8	-0.0569411383734817	0.296918823472368		0.9613	1.04026
Q91W92	Cdc42 effector protein 1	Cdc42ep1	-0.0568688710530623	0.0596561036139771		0.961348	1.04021
Q8BFT9	Synaptic vesicle 2-related protein	Svop	-0.0567565494113502	0.129342028301653		0.961423	1.04012
Q8VH51	RNA-binding protein 39	Rbm39	-0.0565887027316627	0.212289450114351		0.961535	1.04
P50518	V-type proton ATPase subunit E 1	Atp6v1e1	-0.0560949113633882	0.358948647186404		0.961864	1.03965
Q8C460	ERI1 exoribonuclease 3	Eri3	-0.0559777153862875	0.111653340823875		0.961942	1.03956
Q8JZQ9	Eukaryotic translation initiation factor 3 subunit B	Eif3b	-0.0555464426676444	1.0519946844821		0.96223	1.03925
P27659	60S ribosomal protein L3	Rpl3	-0.0553667280409051	0.707349000521182		0.96235	1.03912
P35802	Neuronal membrane glycoprotein M6-a	Gpm6a	-0.0553029378255232	0.130394951179958		0.962392	1.03908
P62908	40S ribosomal protein S3	Rps3	-0.0552260080973319	0.411051333347892		0.962444	1.03902
Q3UPL0	Protein transport protein Sec31A	Sec31a	-0.0549738142225493	0.774401724225033		0.962612	1.03884
Q7M759	Alpha/beta hydrolase domain-containing protein 17B	Abhd17b	-0.0549445682101783	0.0421004843548584		0.962631	1.03882
Q8BHG1	Nardilysin	Nrd1	-0.0546506245930978	0.180241613777375		0.962828	1.03861
Q9D8B3	Charged multivesicular body protein 4b	Chmp4b	-0.0545675489637603	0.330677078657779		0.962883	1.03855
Q9QZD9	Eukaryotic translation initiation factor 3 subunit I	Eif3i	-0.0541712443033866	0.375416978686703		0.963148	1.03826
P56379	6.8 kDa mitochondrial proteolipid	Mp68	-0.0536435445149728	0.1548241388729		0.9635	1.03788
P37040	NADPH--cytochrome P450 reductase	Por	-0.0535301632351342	0.235316968763198		0.963576	1.0378
Q8C079	Striatin-interacting protein 1	Strip1	-0.0533156924777565	0.202293778874279		0.963719	1.03765
Q9CRB9	MICOS complex subunit Mic19	Chchd3	-0.0531961652967645	0.357791570886269		0.963799	1.03756
Q6ZQ38	Cullin-associated NEDD8-dissociated protein 1	Cand1	-0.0530723995632592	1.52047248667349	+	0.963881	1.03747
Q3V1U8	ELMO domain-containing protein 1	Elmod1	-0.0530675252278634	0.0652748295965825		0.963885	1.03747
P70122	Ribosome maturation protein SBDS	Sbds	-0.0529967414008254	0.154580958354891		0.963932	1.03742
Q8BH44	Coronin-2B	Coro2b	-0.0529450310601121	0.357052314984124		0.963967	1.03738
Q811D0	Disks large homolog 1	Dlg1	-0.0529013739691813	0.404127143875188		0.963996	1.03735
Q80Y14	Glutaredoxin-related protein 5, mitochondrial	Glrx5	-0.0523331960042341	0.223032840037012		0.964375	1.03694
Q80UG2	Plexin-A4	Plxna4	-0.0523189968532982	0.179297474219121		0.964385	1.03693
P62754	40S ribosomal protein S6	Rps6	-0.0522897508409272	0.276456326017259		0.964404	1.03691
Q9Z239	Phospholemman	Fxyd1	-0.0521579318576393	0.0755357298281156		0.964493	1.03681
P62267	40S ribosomal protein S23	Rps23	-0.0518942938910598	0.214113892245917		0.964669	1.03663
Q6URW6	Myosin-14	Myh14	-0.0517828199598505	0.0634695280195496		0.964743	1.03655
P51863	V-type proton ATPase subunit d 1	Atp6v0d1	-0.0512508816189232	0.501636042862644		0.965099	1.03616
Q9D0L4	Uncharacterized aarF domain-containing protein kinase 1	Adck1	-0.0512010786268426	0.242761677748784		0.965132	1.03613
Q9Z2H7	PDZ domain-containing protein GIPC2	Gipc2	-0.0510450998942069	0.149969513479062		0.965237	1.03602
Q8BWT5	Disco-interacting protein 2 homolog A	Dip2a	-0.0508664449055978	0.138977238160055		0.965356	1.03589
P49722	Proteasome subunit alpha type-2	Psma2	-0.0507592095269089	0.337178048633426		0.965428	1.03581
Q91VN4	MICOS complex subunit Mic25	Chchd6	-0.0506316290961379	0.135461502197636		0.965514	1.03572
Q9CZS1	Aldehyde dehydrogenase X, mitochondrial	Aldh1b1	-0.0505394405788842	0.195862849513725		0.965575	1.03565
P40240	CD9 antigen	Cd9	-0.0503584543863944	0.111744140822477		0.965696	1.03552
Q922Q4	Pyrroline-5-carboxylate reductase 2	Pycr2	-0.0501145256890183	0.312250039378407		0.96586	1.03535
Q62186	Translocon-associated protein subunit delta	Ssr4	-0.0499303605821417	0.258123163883345		0.965983	1.03521
P57716	Nicastrin	Ncstn	-0.0498947567409935	0.0795591168699398		0.966007	1.03519
Q9Z2D6	Methyl-CpG-binding protein 2	Mecp2	-0.0498928493923607	0.0895615455935748		0.966008	1.03519
Q9D172	ES1 protein homolog, mitochondrial	D10Jhu81e	-0.0498788621690522	0.527045096760147		0.966017	1.03518
Q8BG32	26S proteasome non-ATPase regulatory subunit 11	Psmd11	-0.0498231252034493	0.429795888446679		0.966055	1.03514
P11276	Fibronectin;Anastellin	Fn1	-0.0496523115370024	0.0737156402582884		0.966169	1.03502
Q61687	Transcriptional regulator ATRX	Atrx	-0.0495700836181641	0.117280778679933		0.966224	1.03496
P83887;Q8VCK3	Tubulin gamma-1 chain;Tubulin gamma-2 chain	Tubg1;Tubg2	-0.0494670867919922	0.136558526146734		0.966293	1.03488
Q99J27	Acetyl-coenzyme A transporter 1	Slc33a1	-0.0494166480170364	0.0313778896644184		0.966327	1.03485
Q8CGK3	Lon protease homolog, mitochondrial	Lonp1	-0.0494088066948777	0.334208016518573		0.966332	1.03484
Q8R502	Volume-regulated anion channel subunit LRRC8C	Lrrc8c	-0.0493827395968935	0.04412784110292		0.96635	1.03482
Q8CIN4	Serine/threonine-protein kinase PAK 2;PAK-2p27;PAK-2p34	Pak2	-0.0492333306206589	0.291840459250212		0.96645	1.03471
E9Q3L2		Pi4ka	-0.0490379333496094	0.178828441091273		0.966581	1.03457
Q8R2R9	AP-3 complex subunit mu-2	Ap3m2	-0.0489690568712042	0.304772797525472		0.966627	1.03453
Q6ZWV3;P86048	60S ribosomal protein L10;60S ribosomal protein L10-like	Rpl10;Rpl10l	-0.0488321516248895	0.439666312714475		0.966719	1.03443
Q61081	Hsp90 co-chaperone Cdc37;Hsp90 co-chaperone Cdc37, N-terminally processed	Cdc37	-0.0486185285780181	0.242927819623012		0.966862	1.03427
Q8C6G8	WD repeat-containing protein 26	Wdr26	-0.0484767489963112	0.161868060178089		0.966957	1.03417
P84086	Complexin-2	Cplx2	-0.0483417510986328	0.342428774936846		0.967047	1.03408
P61290	Proteasome activator complex subunit 3	Psme3	-0.0478873782687721	0.144731078292394		0.967352	1.03375
Q99J09	Methylosome protein 50	Wdr77	-0.047855801052517	0.401015227203557		0.967373	1.03373
Q6P5F9	Exportin-1	Xpo1	-0.0477773878309478	0.406133501544891		0.967426	1.03367
P62869	Transcription elongation factor B polypeptide 2	Tceb2	-0.0477316114637603	0.418740658006176		0.967456	1.03364
P17426	AP-2 complex subunit alpha-1	Ap2a1	-0.0473206837971993	0.503042413785925		0.967732	1.03334
Q64487	Receptor-type tyrosine-protein phosphatase delta	Ptprd	-0.0472772386338995	0.180749855737896		0.967761	1.03331
Q62077	1-phosphatidylinositol 4,5-bisphosphate phosphodiesterase gamma-1	Plcg1	-0.0472367604573591	0.130307139428671		0.967788	1.03328
O35969	Guanidinoacetate N-methyltransferase	Gamt	-0.0471301608615455	0.186628904445549		0.96786	1.03321
O89023	Tripeptidyl-peptidase 1	Tpp1	-0.0470926496717645	0.112537326768657		0.967885	1.03318
Q8R1N4	NudC domain-containing protein 3	Nudcd3	-0.046965281168621	0.245535389721545		0.96797	1.03309
Q9DC07	LIM zinc-binding domain-containing Nebulette	Nebl	-0.0466136932373047	0.128992171222476		0.968206	1.03284
Q9D7A8	Armadillo repeat-containing protein 1	Armc1	-0.046329922146267	0.111974260188915		0.968397	1.03263
P56812	Programmed cell death protein 5	Pdcd5	-0.0462506612141951	0.106610695779801		0.96845	1.03258
P08113	Endoplasmin	Hsp90b1	-0.0460601382785377	0.733080137770416		0.968578	1.03244
P03921	NADH-ubiquinone oxidoreductase chain 5	Mtnd5	-0.0455415513780366	0.170443682558216		0.968926	1.03207
Q9WVQ5	Methylthioribulose-1-phosphate dehydratase	Apip	-0.04547945658366	0.316787535904381		0.968968	1.03203
P30999	Catenin delta-1	Ctnnd1	-0.0454582638210717	0.185758261233706		0.968982	1.03201
P54923	[Protein ADP-ribosylarginine] hydrolase	Adprh	-0.0445870293511277	0.289802041933958		0.969567	1.03139
P14152	Malate dehydrogenase, cytoplasmic	Mdh1	-0.044565412733288	0.744327178247266		0.969582	1.03137
P61804	Dolichyl-diphosphooligosaccharide--protein glycosyltransferase subunit DAD1	Dad1	-0.0444418589274065	0.110586751935735		0.969665	1.03128
Q9Z1D1	Eukaryotic translation initiation factor 3 subunit G	Eif3g	-0.0444011688232422	0.342312879166486		0.969692	1.03126
Q6NZC7	SEC23-interacting protein	Sec23ip	-0.0441544850667306	0.239045949207652		0.969858	1.03108
Q9QXG4	Acetyl-coenzyme A synthetase, cytoplasmic	Acss2	-0.0440118577745245	0.079140586995769		0.969954	1.03098
B9EJA2	Cortactin-binding protein 2	Cttnbp2	-0.0439652336968308	0.260779664457626		0.969985	1.03094
Q9WV32	Actin-related protein 2/3 complex subunit 1B	Arpc1b	-0.0437429216172944	0.0324677325887882		0.970135	1.03078
Q8JZM7	Parafibromin	Cdc73	-0.0433201260036924	0.0782928634694096		0.970419	1.03048
O35215	D-dopachrome decarboxylase	Ddt	-0.0431270599365234	0.0993972566978524		0.970549	1.03034
Q9DB32	Hydroxyacylglutathione hydrolase-like protein	Haghl	-0.043118794759117	0.182421039909914		0.970555	1.03034
Q3ULF4	Paraplegin	Spg7	-0.0431181589762382	0.0537853558061293		0.970555	1.03034
Q03265	ATP synthase subunit alpha, mitochondrial	Atp5a1	-0.043047799004448	0.601801515331882		0.970602	1.03029
Q07797	Galectin-3-binding protein	Lgals3bp	-0.0429354773627395	0.0250240024585818		0.970678	1.03021
Q8BNY6	Neuronal calcium sensor 1	Ncs1	-0.0427587297227632	0.0789095928814341		0.970797	1.03008
P97825	Hematological and neurological expressed 1 protein;Hematological and neurological expressed 1 protein, N-terminally processed	Hn1	-0.0427021450466576	0.08352370918226		0.970835	1.03004
Q9D0L8	mRNA cap guanine-N7 methyltransferase	Rnmt	-0.0426928202311174	0.218149312524223		0.970841	1.03003
Q9CX60	Protein LBH	Lbh	-0.0426035987006301	0.168488037774684		0.970901	1.02997
Q8JZN5	Acyl-CoA dehydrogenase family member 9, mitochondrial	Acad9	-0.0425321790907098	0.189627783237611		0.970949	1.02992
Q62417	Sorbin and SH3 domain-containing protein 1	Sorbs1	-0.0420958201090471	0.109615349575773		0.971243	1.02961
Q7TPV4	Myb-binding protein 1A	Mybbp1a	-0.0420375400119362	0.189558761145392		0.971282	1.02957
Q9R0P4	Small acidic protein	Smap	-0.0419521331787109	0.141183928290086		0.97134	1.02951
P62254	Ubiquitin-conjugating enzyme E2 G1;Ubiquitin-conjugating enzyme E2 G1, N-terminally processed	Ube2g1	-0.0419389936659051	0.131358087335276		0.971349	1.0295
P61082	NEDD8-conjugating enzyme Ubc12	Ube2m	-0.0418173472086565	0.199336036142427		0.97143	1.02941
Q9DCV4	Regulator of microtubule dynamics protein 1	Rmdn1	-0.0415636698404924	0.238108178686438		0.971601	1.02923
Q8C547	HEAT repeat-containing protein 5B	Heatr5b	-0.0414108700222435	0.0439218096105572		0.971704	1.02912
Q6A065	Centrosomal protein of 170 kDa	Cep170	-0.041351318359375	0.100189116279854		0.971744	1.02908
Q9CZ44	NSFL1 cofactor p47	Nsfl1c	-0.0412582821316185	0.248337552550081		0.971807	1.02901
Q62422	Osteoclast-stimulating factor 1	Ostf1	-0.0409461127387125	0.0815137335687535		0.972017	1.02879
P62242	40S ribosomal protein S8	Rps8	-0.0409069061279297	0.193132888947292		0.972044	1.02876
Q9ESJ4	NCK-interacting protein with SH3 domain	Nckipsd	-0.0408954620361328	0.145462103434807		0.972051	1.02875
Q8VHK9	ATP-dependent RNA helicase DHX36	Dhx36	-0.0408193800184442	0.0360595226402784		0.972103	1.0287
P52480	Pyruvate kinase PKM	Pkm	-0.0407373640272333	0.56136302987286		0.972158	1.02864
Q3TDK6	Protein rogdi homolog	Rogdi	-0.0405510796440964	0.198173969932787		0.972283	1.02851
O08788	Dynactin subunit 1	Dctn1	-0.0404131147596551	0.654712223420835		0.972376	1.02841
Q925I1	ATPase family AAA domain-containing protein 3	Atad3	-0.0400579240587042	0.11462437880501		0.972616	1.02816
P48036	Annexin A5	Anxa5	-0.0398248036702462	0.0850110464467235		0.972773	1.02799
P56480	ATP synthase subunit beta, mitochondrial	Atp5b	-0.0397913191053618	0.734346534368008		0.972796	1.02797
Q9JKK7	Tropomodulin-2	Tmod2	-0.0397165086534272	0.261583300777969		0.972846	1.02791
Q99K70;Q7TT45	Ras-related GTP-binding protein C;Ras-related GTP-binding protein D	Rragc;Rragd	-0.0397050645616304	0.225791035456189		0.972854	1.0279
Q08274	Dystrophia myotonica WD repeat-containing protein	Dmwd	-0.0396942562527123	0.0491578289339223		0.972861	1.0279
Q8BUV3	Gephyrin;Molybdopterin adenylyltransferase;Molybdopterin molybdenumtransferase	Gphn	-0.0396639506022112	0.344513368122198		0.972882	1.02787
O35083	1-acyl-sn-glycerol-3-phosphate acyltransferase alpha	Agpat1	-0.039589564005535	0.118550851713016		0.972932	1.02782
O88444	Adenylate cyclase type 1	Adcy1	-0.0392220815022775	0.0828631295902063		0.97318	1.02756
Q9CX34	Suppressor of G2 allele of SKP1 homolog	Sugt1	-0.0386990441216355	0.259078564174808		0.973532	1.02719
Q9CQ91	NADH dehydrogenase [ubiquinone] 1 alpha subcomplex subunit 3	Ndufa3	-0.0385343763563384	0.0830573335394345		0.973644	1.02707
Q9CZQ9	Bardet-Biedl syndrome 5 protein homolog	Bbs5	-0.038506401909725	0.0808482151822142		0.973662	1.02705
Q8QZY1	Eukaryotic translation initiation factor 3 subunit L	Eif3l	-0.0383311377631301	0.298539090722203		0.973781	1.02693
O35864	COP9 signalosome complex subunit 5	Cops5	-0.0381389194064674	0.175062673679798		0.97391	1.02679
Q8VBZ3	Cleft lip and palate transmembrane protein 1 homolog	Clptm1	-0.0379134284125442	0.231462965541888		0.974063	1.02663
P08249	Malate dehydrogenase, mitochondrial	Mdh2	-0.0375135209825324	0.400138668717487		0.974333	1.02634
Q9QY76	Vesicle-associated membrane protein-associated protein B	Vapb	-0.0374668969048422	0.292370458812707		0.974364	1.02631
Q8CGA0	Protein phosphatase 1F	Ppm1f	-0.037332746717663	0.0753036625039164		0.974455	1.02621
O54865	Guanylate cyclase soluble subunit beta-1	Gucy1b3	-0.0372674730088995	0.14971031841358		0.974499	1.02617
P58871	182 kDa tankyrase-1-binding protein	Tnks1bp1	-0.0366554260253906	0.0317138780269452		0.974912	1.02573
P62737;P63268	Actin, aortic smooth muscle;Actin, gamma-enteric smooth muscle	Acta2;Actg2	-0.0366397433810768	0.0378684050182214		0.974923	1.02572
P55264	Adenosine kinase	Adk	-0.0366388956705741	0.147321397517978		0.974924	1.02572
Q8R4E6	Purine-rich element-binding protein gamma	Purg	-0.0364844004313163	0.145717276959155		0.975028	1.02561
Q4KWH5	1-phosphatidylinositol 4,5-bisphosphate phosphodiesterase eta-1	Plch1	-0.036293665568035	0.145587889500135		0.975157	1.02548
P59764	Dedicator of cytokinesis protein 4	Dock4	-0.0362237294514998	0.116142568917112		0.975204	1.02543
Q62418	Drebrin-like protein	Dbnl	-0.0360768636067696	0.314713244917493		0.975303	1.02532
Q6PDI5	Proteasome-associated protein ECM29 homolog	Ecm29	-0.0360546112060547	0.122729483304936		0.975319	1.02531
P61089	Ubiquitin-conjugating enzyme E2 N	Ube2n	-0.0360113779703752	0.293927341359389		0.975348	1.02528
Q8K4G5	Actin-binding LIM protein 1	Ablim1	-0.035889943440754	0.154646373779954		0.97543	1.02519
O55029	Coatomer subunit beta	Copb2	-0.0357159508599167	0.219649423078822		0.975548	1.02507
P22723	Gamma-aminobutyric acid receptor subunit gamma-2	Gabrg2	-0.0355387793646926	0.150689608800407		0.975667	1.02494
P61329	Fibroblast growth factor 12	Fgf12	-0.0353459252251547	0.11289101902557		0.975798	1.0248
P09103	Protein disulfide-isomerase	P4hb	-0.0353003607855911	0.226435427779717		0.975829	1.02477
P17225	Polypyrimidine tract-binding protein 1	Ptbp1	-0.0349277920193138	0.0749762725509684		0.976081	1.02451
Q01279	Epidermal growth factor receptor	Egfr	-0.0348508622911261	0.041939755692115		0.976133	1.02445
P17751	Triosephosphate isomerase	Tpi1	-0.0348105960422096	0.147564275571253		0.97616	1.02442
Q9EP53	Hamartin	Tsc1	-0.0345863766140404	0.0494051853521302		0.976312	1.02426
Q9ES28	Rho guanine nucleotide exchange factor 7	Arhgef7	-0.0345588260226783	0.171932598177451		0.97633	1.02424
Q9D819	Inorganic pyrophosphatase	Ppa1	-0.0337590111626511	0.293922618924599		0.976872	1.02368
P26041	Moesin	Msn	-0.0337253146701393	0.0716752280016476		0.976895	1.02365
Q9WV02	RNA-binding motif protein, X chromosome;RNA-binding motif protein, X chromosome, N-terminally processed	Rbmx	-0.0336545308430978	0.061925404899248		0.976942	1.0236
P48024	Eukaryotic translation initiation factor 1	Eif1	-0.0333913167317732	0.191312379242419		0.977121	1.02342
P61164	Alpha-centractin	Actr1a	-0.0333080291748047	0.261394663493041		0.977177	1.02336
A2A8Z1	Oxysterol-binding protein-related protein 9	Osbpl9	-0.0333027309841576	0.0590388335731271		0.977181	1.02335
Q91YE6	Importin-9	Ipo9	-0.0331617991129569	0.129012048613625		0.977276	1.02325
P27773	Protein disulfide-isomerase A3	Pdia3	-0.0331073337131045	0.343877504197052		0.977313	1.02321
O70310	Glycylpeptide N-tetradecanoyltransferase 1	Nmt1	-0.0330878363715286	0.119836755739718		0.977326	1.0232
O89086	RNA-binding protein 3	Rbm3	-0.0330191718207473	0.0504647411858248		0.977373	1.02315
P68033	Actin, alpha cardiac muscle 1	Actc1	-0.032922956678604	0.0543630984581901		0.977438	1.02308
Q9D8N2	Protein FAM45A	Fam45a	-0.0326529608832473	0.0277097801948206		0.977621	1.02289
P62702	40S ribosomal protein S4, X isoform	Rps4x	-0.0319137573242188	0.200337368201374		0.978122	1.02237
Q80UG5	Septin-9	Sept9	-0.0317490895589181	0.110255103735142		0.978234	1.02225
Q6PER3	Microtubule-associated protein RP/EB family member 3	Mapre3	-0.0315789116753464	0.222242975450464		0.978349	1.02213
Q6GYP7	Ral GTPase-activating protein subunit alpha-1	Ralgapa1	-0.0315670437282982	0.107460990615605		0.978357	1.02212
P62717	60S ribosomal protein L18a	Rpl18a	-0.0313688913981096	0.148192938795733		0.978491	1.02198
Q8BYN5	FSD1-like protein	Fsd1l	-0.0312572055392799	0.150402166963119		0.978567	1.0219
Q6P5E4	UDP-glucose:glycoprotein glucosyltransferase 1	Uggt1	-0.031093173556858	0.168204200466664		0.978678	1.02179
Q9R0D8	WD repeat-containing protein 54	Wdr54	-0.0308596293131522	0.0727940809518855		0.978837	1.02162
Q3V3R4	Integrin alpha-1	Itga1	-0.0301299624972877	0.0355387215069248		0.979332	1.0211
O08997	Copper transport protein ATOX1	Atox1	-0.0301157633463518	0.0642589286425368		0.979342	1.02109
P40336	Vacuolar protein sorting-associated protein 26A	Vps26a	-0.0299786461724167	0.0876990306076502		0.979435	1.021
P07310	Creatine kinase M-type	Ckm	-0.0291449228922538	0.0269827373238459		0.980001	1.02041
Q6PGB6	N-alpha-acetyltransferase 50	Naa50	-0.0290542178683815	0.0622204096545481		0.980063	1.02034
Q9CPP6	NADH dehydrogenase [ubiquinone] 1 alpha subcomplex subunit 5	Ndufa5	-0.0286723242865676	0.172514941234168		0.980322	1.02007
Q9CPR4	60S ribosomal protein L17	Rpl17	-0.0285989973280181	0.184122614296005		0.980372	1.02002
O35286	Pre-mRNA-splicing factor ATP-dependent RNA helicase DHX15	Dhx15	-0.0285597907172281	0.172307830124597		0.980399	1.01999
Q99KI0	Aconitate hydratase, mitochondrial	Aco2	-0.0281880696614571	0.442461505249029		0.980651	1.01973
Q9CQC6	Basic leucine zipper and W2 domain-containing protein 1	Bzw1	-0.0279536777072487	0.126513735426674		0.98081	1.01956
Q9D2G2	Dihydrolipoyllysine-residue succinyltransferase component of 2-oxoglutarate dehydrogenase complex, mitochondrial	Dlst	-0.0277370876736107	0.1774575217783		0.980958	1.01941
P70333	Heterogeneous nuclear ribonucleoprotein H2	Hnrnph2	-0.0275124443901902	0.203692870271022		0.981111	1.01925
P62631	Elongation factor 1-alpha 2	Eef1a2	-0.0274550120035819	0.1717842049975		0.98115	1.01921
Q99PE9	ADP-ribosylation factor-like protein 4D	Arl4d	-0.0270767211914063	0.00998886007849685		0.981407	1.01895
Q64514	Tripeptidyl-peptidase 2	Tpp2	-0.0268976423475493	0.262909076791267		0.981529	1.01882
Q8K0U4	Heat shock 70 kDa protein 12A	Hspa12a	-0.0268751780192034	0.139273291586499		0.981544	1.0188
O35887	Calumenin	Calu	-0.0267124176025391	0.233995162261768		0.981655	1.01869
Q9DCX2	ATP synthase subunit d, mitochondrial	Atp5h	-0.0266816880967866	0.293703048732984		0.981676	1.01867
Q8BMG7	Rab3 GTPase-activating protein non-catalytic subunit	Rab3gap2	-0.0264911651611328	0.188565321027557		0.981805	1.01853
P80315	T-complex protein 1 subunit delta	Cct4	-0.0263142055935326	0.305729364179344		0.981926	1.01841
Q8K2I2	Coiled-coil alpha-helical rod protein 1	Cchcr1	-0.0262196858723946	0.0755583103593413		0.98199	1.01834
Q8VEH8	Endoplasmic reticulum lectin 1	Erlec1	-0.0260295867919922	0.0464369180823293		0.982119	1.01821
Q8BGU5	Cyclin-Y	Ccny	-0.0259291330973284	0.113767543516668		0.982188	1.01814
Q9D7N9	Adipocyte plasma membrane-associated protein	Apmap	-0.0258818732367594	0.0936582753923399		0.98222	1.0181
O88952	Protein lin-7 homolog C	Lin7c	-0.0258115132649728	0.0632664888991523		0.982268	1.01805
Q61035	Histidine--tRNA ligase, cytoplasmic	Hars	-0.0255722469753685	0.213361231888898		0.982431	1.01788
O70172	Phosphatidylinositol 5-phosphate 4-kinase type-2 alpha	Pip4k2a	-0.025516933865017	0.0436702298765997		0.982469	1.01784
Q8C0E2	Vacuolar protein sorting-associated protein 26B	Vps26b	-0.0255131191677513	0.112810526401556		0.982471	1.01784
B1AZI6	THO complex subunit 2	Thoc2	-0.0255037943522147	0.0548551519597537		0.982477	1.01784
Q9Z1G4	V-type proton ATPase 116 kDa subunit a isoform 1	Atp6v0a1	-0.0253293779161226	0.133193133062519		0.982596	1.01771
P63276	40S ribosomal protein S17	Rps17	-0.0250767601860886	0.118304185368794		0.982768	1.01753
Q9WUU7	Cathepsin Z	Ctsz	-0.0249972873263893	0.0369846007164759		0.982822	1.01748
Q9DBH5	Vesicular integral-membrane protein VIP36	Lman2	-0.0246620178222656	0.0960938507505942		0.983051	1.01724
P60229	Eukaryotic translation initiation factor 3 subunit E	Eif3e	-0.0245999230278855	0.137665752922332		0.983093	1.0172
Q8K3H0	DCC-interacting protein 13-alpha	Appl1	-0.0243256886800118	0.104974130574157		0.98328	1.017
Q91ZZ3	Beta-synuclein	Sncb	-0.0242646535237654	0.0737814355368514		0.983322	1.01696
O55142	60S ribosomal protein L35a	Rpl35a	-0.0240940517849388	0.134930215417682		0.983438	1.01684
O35129	Prohibitin-2	Phb2	-0.02373441060384	0.276262696457423		0.983683	1.01659
Q8K0G5	Protein TSSC1	Tssc1	-0.0236538781060105	0.106899918589668		0.983738	1.01653
P48318	Glutamate decarboxylase 1	Gad1	-0.0236464606391067	0.130031294355641		0.983743	1.01653
Q8BGH2	Sorting and assembly machinery component 50 homolog	Samm50	-0.0235572391086158	0.129181972654718		0.983804	1.01646
Q8VDC1	FYVE and coiled-coil domain-containing protein 1	Fyco1	-0.0235368940565301	0.115084917075508		0.983818	1.01645
Q9QYS9	Protein quaking	Qki	-0.0235335032145159	0.0520437692398118		0.98382	1.01645
O70305	Ataxin-2	Atxn2	-0.023379007975258	0.0752899795301974		0.983926	1.01634
Q9CY18	Sorting nexin-7	Snx7	-0.0231664445665167	0.0402929088847312		0.98407	1.01619
Q6PA06	Atlastin-2	Atl2	-0.0231276618109817	0.0421907466254281		0.984097	1.01616
P23506	Protein-L-isoaspartate(D-aspartate) O-methyltransferase	Pcmt1	-0.023072560628254	0.077296151590549		0.984135	1.01612
Q5SVL6	Rap1 GTPase-activating protein 2	Rap1gap2	-0.0230013529459647	0.038078900276194		0.984183	1.01607
P62264	40S ribosomal protein S14	Rps14	-0.0228909386528855	0.119021081532686		0.984258	1.01599
Q9CR41	Huntingtin-interacting protein K	Hypk	-0.0228263007269973	0.0791778602311087		0.984303	1.01595
Q8BFR4	N-acetylglucosamine-6-sulfatase	Gns	-0.0228084988064232	0.0449645875264184		0.984315	1.01594
Q810U3	Neurofascin	Nfasc	-0.022784127129448	0.0695807703581592		0.984331	1.01592
Q5SV85	Synergin gamma	Synrg	-0.0226601494683152	0.057452053456529		0.984416	1.01583
Q8BG39	Synaptic vesicle glycoprotein 2B	Sv2b	-0.0226306915283203	0.0580861722564846		0.984436	1.01581
Q9R0Q6	Actin-related protein 2/3 complex subunit 1A	Arpc1a	-0.0225533379448777	0.0928372115928628		0.984489	1.01576
P09405	Nucleolin	Ncl	-0.0223411983913842	0.226840647920504		0.984634	1.01561
Q921W4	Quinone oxidoreductase-like protein 1	Cryzl1	-0.0221305423312721	0.11519313136677		0.984777	1.01546
Q7TSE6	Serine/threonine-protein kinase 38-like	Stk38l	-0.0218855539957694	0.0426829766218463		0.984945	1.01529
Q8CHY3	Dymeclin	Dym	-0.0218664805094413	0.0489525017579107		0.984958	1.01527
P58252	Elongation factor 2	Eef2	-0.0216217041015625	0.160028734477892		0.985125	1.0151
O88569	Heterogeneous nuclear ribonucleoproteins A2/B1	Hnrnpa2b1	-0.0215441385904924	0.195075094248037		0.985178	1.01505
Q0KL02	Triple functional domain protein	Trio	-0.0213868882920991	0.0936816485856863		0.985285	1.01493
Q8BK67	Protein RCC2	Rcc2	-0.0212080213758661	0.0463066531998674		0.985407	1.01481
P30416	Peptidyl-prolyl cis-trans isomerase FKBP4;Peptidyl-prolyl cis-trans isomerase FKBP4, N-terminally processed	Fkbp4	-0.0207860734727632	0.15492953191625		0.985695	1.01451
P63037	DnaJ homolog subfamily A member 1	Dnaja1	-0.0206786261664469	0.118853969551983		0.985769	1.01444
Q9QXJ1	Amyloid beta A4 precursor protein-binding family B member 1	Apbb1	-0.0206065707736549	0.0289154756386476		0.985818	1.01439
Q99LP6	GrpE protein homolog 1, mitochondrial	Grpel1	-0.0206000010172502	0.103420123712095		0.985823	1.01438
P63168	Dynein light chain 1, cytoplasmic	Dynll1	-0.0205815633138009	0.0847125541364098		0.985835	1.01437
Q91YQ5	Dolichyl-diphosphooligosaccharide--protein glycosyltransferase subunit 1	Rpn1	-0.0205781724717866	0.119087391115076		0.985838	1.01437
P61022	Calcineurin B homologous protein 1	Chp1	-0.0204616122775612	0.0150715592692882		0.985917	1.01428
Q60973	Histone-binding protein RBBP7	Rbbp7	-0.0202467176649321	0.130754494721905		0.986064	1.01413
Q5U430	E3 ubiquitin-protein ligase UBR3	Ubr3	-0.0199629465738944	0.0291673944741429		0.986258	1.01393
Q9D0F9	Phosphoglucomutase-1	Pgm1	-0.0199402703179281	0.132647199148006		0.986274	1.01392
Q60963	Platelet-activating factor acetylhydrolase	Pla2g7	-0.0198966132269973	0.0152608444053885		0.986303	1.01389
P46638	Ras-related protein Rab-11B	Rab11b	-0.0198930104573556	0.228372506471956		0.986306	1.01388
Q9WUM4	Coronin-1C	Coro1c	-0.0197128719753685	0.150188878915374		0.986429	1.01376
Q9DB27;Q9CQ21	Malignant T-cell-amplified sequence 1;Malignant T-cell-amplified sequence 2	Mcts1;Mcts2	-0.0196764204237176	0.128408318955719		0.986454	1.01373
P19253	60S ribosomal protein L13a	Rpl13a	-0.0196685791015625	0.0928328187390591		0.986459	1.01373
P25444	40S ribosomal protein S2	Rps2	-0.0196446312798422	0.104441190458446		0.986476	1.01371
P29341	Polyadenylate-binding protein 1	Pabpc1	-0.0192919837103922	0.224823659427727		0.986717	1.01346
P62082	40S ribosomal protein S7	Rps7	-0.0181978013780402	0.0949096275999416		0.987465	1.01269
Q8BWY3	Eukaryotic peptide chain release factor subunit 1	Etf1	-0.0181225670708542	0.214678508733377		0.987517	1.01264
Q68FD5	Clathrin heavy chain 1	Cltc	-0.0177811516655808	0.23322646831164		0.987751	1.0124
P51881	ADP/ATP translocase 2;ADP/ATP translocase 2, N-terminally processed	Slc25a5	-0.0175813039143868	0.0894128243175493		0.987888	1.01226
P09671	Superoxide dismutase [Mn], mitochondrial	Sod2	-0.0174793667263451	0.162213435332249		0.987957	1.01219
Q8BRF7	Sec1 family domain-containing protein 1	Scfd1	-0.0173403422037772	0.0561513939418309		0.988053	1.01209
Q9DB15	39S ribosomal protein L12, mitochondrial	Mrpl12	-0.0171852111816406	0.0364449320460528		0.988159	1.01198
Q9CR57	60S ribosomal protein L14	Rpl14	-0.0171294742160377	0.0508353602910317		0.988197	1.01194
P05132	cAMP-dependent protein kinase catalytic subunit alpha	Prkaca	-0.0171256595187721	0.0515538106916497		0.9882	1.01194
Q61474	RNA-binding protein Musashi homolog 1	Msi1	-0.0169211493598098	0.0226843586767366		0.98834	1.0118
Q9JIP4	Pannexin-1	Panx1	-0.0169181823730469	0.0206538698533101		0.988342	1.0118
P60843	Eukaryotic initiation factor 4A-I	Eif4a1	-0.0162323845757371	0.170220344892298		0.988812	1.01131
O35226	26S proteasome non-ATPase regulatory subunit 4	Psmd4	-0.0160001118977853	0.141647015905694		0.988971	1.01115
Q9D1C8	Vacuolar protein sorting-associated protein 28 homolog	Vps28	-0.0155893961588554	0.0610933857886949		0.989252	1.01086
Q8BHB9	Chloride intracellular channel protein 6	Clic6	-0.0153202480740049	0.0299046635464717		0.989437	1.01068
Q91WS0	CDGSH iron-sulfur domain-containing protein 1	Cisd1	-0.0150786505805094	0.0715364108250469		0.989603	1.01051
Q8VDQ1	Prostaglandin reductase 2	Ptgr2	-0.0150114695231096	0.0330392342759276		0.989649	1.01046
Q91YR9	Prostaglandin reductase 1	Ptgr1	-0.0149637858072893	0.0206254323412133		0.989681	1.01043
G5E8K5	Ankyrin-3	Ank3	-0.0146518283420143	0.0749545518475974		0.989896	1.01021
Q8BLR2	Copine-4	Cpne4	-0.0144837697346993	0.0236273866862651		0.990011	1.01009
Q9D4H8	Cullin-2	Cul2	-0.0142175886366083	0.0706519057584374		0.990194	1.0099
P50136	2-oxoisovalerate dehydrogenase subunit alpha, mitochondrial	Bckdha	-0.0139251285129127	0.0458312706690095		0.990394	1.0097
O35685	Nuclear migration protein nudC	Nudc	-0.0137413872612839	0.07700362864817		0.99052	1.00957
Q91VC3	Eukaryotic initiation factor 4A-III;Eukaryotic initiation factor 4A-III, N-terminally processed	Eif4a3	-0.0136455959743955	0.0380164302283795		0.990586	1.0095
Q9CZ83	39S ribosomal protein L55, mitochondrial	Mrpl55	-0.0136197408040388	0.0370056945858692		0.990604	1.00949
Q8C522	Endonuclease domain-containing 1 protein	Endod1	-0.013526280721031	0.0378530479182692		0.990668	1.00942
P18242	Cathepsin D	Ctsd	-0.0132196214463995	0.0317554453629992		0.990879	1.00921
Q8VED9	Galectin-related protein	Lgalsl	-0.0131992763943138	0.0620766470594676		0.990893	1.00919
Q8K212	Phosphofurin acidic cluster sorting protein 1	Pacs1	-0.0131039089626732	0.0721613265342605		0.990958	1.00912
P23116	Eukaryotic translation initiation factor 3 subunit A	Eif3a	-0.0130530463324661	0.0935454384437215		0.990993	1.00909
Q9D6J5	NADH dehydrogenase [ubiquinone] 1 beta subcomplex subunit 8, mitochondrial	Ndufb8	-0.0128442976209833	0.0475901462218125		0.991137	1.00894
Q921G7	Electron transfer flavoprotein-ubiquinone oxidoreductase, mitochondrial	Etfdh	-0.0128262837727888	0.0385372545776826		0.991149	1.00893
Q62420	Endophilin-A1	Sh3gl2	-0.0127991570366746	0.0646659274137455		0.991168	1.00891
Q9JIA1	Leucine-rich glioma-inactivated protein 1	Lgi1	-0.0124492645263672	0.0298925632663861		0.991408	1.00867
Q9JLN9	Serine/threonine-protein kinase mTOR	Mtor	-0.0124246809217681	0.0727226664947796		0.991425	1.00865
P62069;Q9D9M2	Ubiquitin carboxyl-terminal hydrolase 46;Ubiquitin carboxyl-terminal hydrolase 12	Usp46;Usp12	-0.0122267405192069	0.0311899307380952		0.991561	1.00851
Q91Z38	Tetratricopeptide repeat protein 1	Ttc1	-0.0120283762613944	0.0328732966268906		0.991697	1.00837
P80318	T-complex protein 1 subunit gamma	Cct3	-0.0117119683159714	0.168922320663831		0.991915	1.00815
P61028	Ras-related protein Rab-8B	Rab8b	-0.0117081536187058	0.0133867709041583		0.991917	1.00815
Q8K4P0	pre-mRNA 3 end processing protein WDR33	Wdr33	-0.0116746690538179	0.031120759547055		0.99194	1.00813
Q9D7M1	Glucose-induced degradation protein 8 homolog	Gid8	-0.0116280449761312	0.0385829743083749		0.991972	1.00809
Q9JJV2	Profilin-2	Pfn2	-0.0114623175727004	0.0848035313076148		0.992086	1.00798
Q9WU28	Prefoldin subunit 5	Pfdn5	-0.0113196902804873	0.04787840462967		0.992184	1.00788
P62334	26S protease regulatory subunit 10B	Psmc6	-0.0111113654242594	0.052504157888901		0.992328	1.00773
Q99LR1	Monoacylglycerol lipase ABHD12	Abhd12	-0.0109153323703346	0.0485930152652133		0.992463	1.00759
P58281	Dynamin-like 120 kDa protein, mitochondrial;Dynamin-like 120 kDa protein, form S1	Opa1	-0.0108869340684663	0.0684787349568504		0.992482	1.00757
Q9Z1W9	STE20/SPS1-related proline-alanine-rich protein kinase	Stk39	-0.0107127295600051	0.0417035030352166		0.992602	1.00745
P80316	T-complex protein 1 subunit epsilon	Cct5	-0.0106724633110886	0.10548398046083		0.99263	1.00743
Q5DU57	Spermatogenesis-associated protein 13	Spata13	-0.0104461246066627	0.0195412131237144		0.992785	1.00727
P42669	Transcriptional activator protein Pur-alpha	Pura	-0.0101746453179281	0.0924086159070588		0.992972	1.00708
P70195	Proteasome subunit beta type-7	Psmb7	-0.00990655687120423	0.0722916729148254		0.993157	1.00689
O35381	Acidic leucine-rich nuclear phosphoprotein 32 family member A	Anp32a	-0.00977706909179688	0.0585387011595437		0.993246	1.0068
Q8BFY9	Transportin-1	Tnpo1	-0.009595023261177	0.0224789553205173		0.993371	1.00667
Q63844	Mitogen-activated protein kinase 3	Mapk3	-0.00951682196723169	0.034636893476963		0.993425	1.00662
Q9D0M5	Dynein light chain 2, cytoplasmic	Dynll2	-0.00951555040147412	0.0377530341581217		0.993426	1.00662
Q9DBR7	Protein phosphatase 1 regulatory subunit 12A	Ppp1r12a	-0.00948482089572522	0.0338178971960855		0.993447	1.0066
Q8BV13	COP9 signalosome complex subunit 7b	Cops7b	-0.00899844699435803	0.0208334898072686		0.993782	1.00626
Q91Z31	Polypyrimidine tract-binding protein 2	Ptbp2	-0.00879012213813013	0.0373384564053864		0.993926	1.00611
Q3U1F9	Phosphoprotein associated with glycosphingolipid-enriched microdomains 1	Pag1	-0.00872039794921875	0.00879703344314731		0.993974	1.00606
Q8BMJ2	Leucine--tRNA ligase, cytoplasmic	Lars	-0.00855170355902857	0.0578030612191792		0.99409	1.00595
Q62086	Serum paraoxonase/arylesterase 2	Pon2	-0.00849617852104956	0.0268828720024267		0.994128	1.00591
P55088	Aquaporin-4	Aqp4	-0.00841140747070313	0.0117888810183765		0.994187	1.00585
P05064	Fructose-bisphosphate aldolase A	Aldoa	-0.00779236687554175	0.0406528014647341		0.994613	1.00542
Q61656	Probable ATP-dependent RNA helicase DDX5	Ddx5	-0.00768746270074061	0.0558951784042455		0.994686	1.00534
P80314	T-complex protein 1 subunit beta	Cct2	-0.00687959459093079	0.0413703561035248		0.995243	1.00478
Q5SSL4	Active breakpoint cluster region-related protein	Abr	-0.00653182135688013	0.0338759988481004		0.995483	1.00454
P07901	Heat shock protein HSP 90-alpha	Hsp90aa1	-0.00650321112738794	0.126713030996509		0.995502	1.00452
Q9WU78	Programmed cell death 6-interacting protein	Pdcd6ip	-0.00638241238064197	0.0463703062307024		0.995586	1.00443
O55128	Histone deacetylase complex subunit SAP18	Sap18	-0.00632921854655066	0.0150262243238258		0.995623	1.0044
P83510	Traf2 and NCK-interacting protein kinase	Tnik	-0.00618426005045691	0.0280660440424798		0.995723	1.0043
Q9WV60	Glycogen synthase kinase-3 beta	Gsk3b	-0.00600348578559107	0.0274425681551091		0.995847	1.00417
P80317	T-complex protein 1 subunit zeta	Cct6a	-0.00578647189670178	0.0589409645128438		0.995997	1.00402
Q8VCH6	Delta(24)-sterol reductase	Dhcr24	-0.00577269660102075	0.0103495704213421		0.996007	1.00401
P35235	Tyrosine-protein phosphatase non-receptor type 11	Ptpn11	-0.00544187757704151	0.0303696428966004		0.996235	1.00378
P45591	Cofilin-2	Cfl2	-0.00540796915690223	0.0402834657394978		0.996258	1.00376
P29595	NEDD8	Nedd8	-0.00540182325575245	0.0124714510534144		0.996263	1.00375
Q8BPN8	DmX-like protein 2	Dmxl2	-0.00528971354166785	0.0242790893983436		0.99634	1.00367
Q9JII5	DAZ-associated protein 1	Dazap1	-0.00487136840820313	0.0117397527890296		0.996629	1.00338
Q64727	Vinculin	Vcl	-0.00483152601454151	0.010621457076454		0.996657	1.00335
P70207	Plexin-A2	Plxna2	-0.00483025444878393	0.00891955102083692		0.996658	1.00335
O54950	5-AMP-activated protein kinase subunit gamma-1	Prkag1	-0.00454648335774976	0.0105166369728966		0.996854	1.00316
P63321	Ras-related protein Ral-A	Rala	-0.00434811909993371	0.015895401903068		0.996991	1.00302
Q8R010	Aminoacyl tRNA synthase complex-interacting multifunctional protein 2	Aimp2	-0.00432586669921875	0.0221058609277489		0.997006	1.003
A2AWA9	Rab GTPase-activating protein 1	Rabgap1	-0.00350252787272254	0.0141151944486189		0.997575	1.00243
Q9R1V7	Disintegrin and metalloproteinase domain-containing protein 23	Adam23	-0.00341394212510693	0.0106528572782998		0.997636	1.00237
Q8K3W0	BRCA1-A complex subunit BRE	Bre	-0.00295003255208215	0.00690440661108271		0.997957	1.00205
Q8CIB5	Fermitin family homolog 2	Fermt2	-0.00293350219726563	0.00826105512502326		0.997969	1.00204
P01831	Thy-1 membrane glycoprotein	Thy1	-0.00246005588107678	0.0108807529639471		0.998296	1.00171
Q01768	Nucleoside diphosphate kinase B	Nme2	-0.00240961710612098	0.0122876366310434		0.998331	1.00167
P80313	T-complex protein 1 subunit eta	Cct7	-0.00228924221462634	0.0222553675548683		0.998414	1.00159
P62743	AP-2 complex subunit sigma	Ap2s1	-0.0020192464192732	0.00712460990973876		0.998601	1.0014
Q8CFE4	SCY1-like protein 2	Scyl2	-0.00179100036621094	0.00450560449958646		0.998759	1.00124
Q61166	Microtubule-associated protein RP/EB family member 1	Mapre1	-0.0017342037624779	0.00990979492006981		0.998799	1.0012
P28656	Nucleosome assembly protein 1-like 1	Nap1l1	-0.00170707702636719	0.00562097740193798		0.998817	1.00118
P0C0A3	Charged multivesicular body protein 6	Chmp6	-0.001665963066948	0.00563113681023764		0.998846	1.00116
P60764	Ras-related C3 botulinum toxin substrate 3	Rac3	-0.00138749016655737	0.00209910800252		0.999039	1.00096
Q8VE22	28S ribosomal protein S23, mitochondrial	Mrps23	-0.00130950080023595	0.00281721597009791		0.999093	1.00091
Q9WUC3	Lymphocyte antigen 6H	Ly6h	-0.0012639363606759	0.00555473112593472		0.999124	1.00088
Q8BUV8	Protein GPR107	Gpr107	-0.00126033359103772	0.00162059015363493		0.999127	1.00087
O55028	[3-methyl-2-oxobutanoate dehydrogenase [lipoamide]] kinase, mitochondrial	Bckdk	-0.00125058492024621	0.00283410790065694		0.999134	1.00087
O09061	Proteasome subunit beta type-1	Psmb1	-0.00100241767035669	0.0128833988177209		0.999305	1.0007
Q9WVJ2	26S proteasome non-ATPase regulatory subunit 13	Psmd13	-0.000952402750648673	0.00544699107436439		0.99934	1.00066
P59999	Actin-related protein 2/3 complex subunit 4	Arpc4	-0.000883526272243529	0.00438034634032827		0.999388	1.00061
P61211	ADP-ribosylation factor-like protein 1	Arl1	-0.000769721137150015	0.00234876421738842		0.999467	1.00053
O54931	A-kinase anchor protein 2	Akap2	-0.000411775377060053	0.000726968036624929		0.999715	1.00029
B9EJ80		Pdzd8	-0.00022676255967724	0.00043952875468333		0.999843	1.00016
O35526	Syntaxin-1A	Stx1a	-0.000123341878254024	0.000261136273042507		0.999915	1.00009
Q91WK2	Eukaryotic translation initiation factor 3 subunit H	Eif3h	6.56975640112023E-06	3.06270617827783E-05		1	0.999995
Q8BL97	Serine/arginine-rich splicing factor 7	Srsf7	7.03599717866155E-05	0.000276775314033719		1.00005	0.999951
Q9JKV1	Proteasomal ubiquitin receptor ADRM1	Adrm1	0.000135209825305793	0.000529360682685025		1.00009	0.999906
Q91W39	Nuclear receptor coactivator 5	Ncoa5	0.000233756171333255	0.000802718242679499		1.00016	0.999838
P46978	Dolichyl-diphosphooligosaccharide--protein glycosyltransferase subunit STT3A	Stt3a	0.000423219468860481	0.00104518756047891		1.00029	0.999707
Q9JJY3	Sphingomyelin phosphodiesterase 3	Smpd3	0.00050565931532276	0.00144765634942597		1.00035	0.99965
P42227	Signal transducer and activator of transcription 3	Stat3	0.000553131103515625	0.000823783931919266		1.00038	0.999617
Q9Z0N1;Q9Z0N2	Eukaryotic translation initiation factor 2 subunit 3, X-linked;Eukaryotic translation initiation factor 2 subunit 3, Y-linked	Eif2s3x;Eif2s3y	0.000597847832572995	0.00368344075217731		1.00041	0.999586
C0HKG6;C0HKG5			0.000724580552844856	0.00088393014368602		1.0005	0.999498
Q9D394	Protein RUFY3	Rufy3	0.00168673197428504	0.00830955455580964		1.00117	0.998832
O55042	Alpha-synuclein	Snca	0.00187767876519018	0.00633317178579872		1.0013	0.998699
P61161	Actin-related protein 2	Actr2	0.00225533379448706	0.0120412903604381		1.00156	0.998438
P59708	Splicing factor 3B subunit 6	Sf3b6	0.00242996215820313	0.00769661230887855		1.00169	0.998317
O88507	Ciliary neurotrophic factor receptor subunit alpha	Cntfr	0.0024820963541643	0.0016227502266824		1.00172	0.998281
Q9JM76	Actin-related protein 2/3 complex subunit 3	Arpc3	0.00271055433485401	0.0164540183088721		1.00188	0.998123
Q80V26	Inositol monophosphatase 3	Impad1	0.00281079610189039	0.00728410069224113		1.00195	0.998054
Q9D1E6	Tubulin-folding cofactor B	Tbcb	0.0029424031575509	0.013326667690765		1.00204	0.997963
Q91XY4	Protocadherin gamma-A4	Pcdhga4	0.003173828125	0.0129849860552565		1.0022	0.997802
Q9CQY6	Ubiquinol-cytochrome-c reductase complex assembly factor 2	Uqcc2	0.00322850545247633	0.00295754723741004		1.00224	0.997765
Q922B2	Aspartate--tRNA ligase, cytoplasmic	Dars	0.00366020202636719	0.0186115671615305		1.00254	0.997466
Q9D1K2	V-type proton ATPase subunit F	Atp6v1f	0.00375196668836608	0.0152484494513033		1.0026	0.997403
Q01853	Transitional endoplasmic reticulum ATPase	Vcp	0.00376277499728772	0.0769276436972706		1.00261	0.997395
Q7TN29	Stromal membrane-associated protein 2	Smap2	0.00383758544921875	0.0161764403891489		1.00266	0.997344
Q9Z1B3	1-phosphatidylinositol 4,5-bisphosphate phosphodiesterase beta-1	Plcb1	0.00385369194878393	0.0193513181059884		1.00267	0.997332
Q80UJ7	Rab3 GTPase-activating protein catalytic subunit	Rab3gap1	0.00392935011121764	0.0127748952775403		1.00273	0.99728
Q61315	Adenomatous polyposis coli protein	Apc	0.00410673353406921	0.00308301083300014		1.00285	0.997157
Q9JK23	Proteasome assembly chaperone 1	Psmg1	0.00413280063205335	0.012119161654687		1.00287	0.997139
P23780	Beta-galactosidase	Glb1	0.00439495510525134	0.0117084637978583		1.00305	0.996958
P42337	Phosphatidylinositol 4,5-bisphosphate 3-kinase catalytic subunit alpha isoform	Pik3ca	0.00450833638508996	0.0105868915692973		1.00313	0.99688
Q8CHK3	Lysophospholipid acyltransferase 7	Mboat7	0.00452084011501697	0.0163615566307897		1.00314	0.996871
Q8R313	Exocyst complex component 6	Exoc6	0.00453546312120423	0.00655802655005534		1.00315	0.996861
Q6NZL0	Protein SOGA3	Soga3	0.004547119140625	0.0219295890610008		1.00316	0.996853
P59281	Rho GTPase-activating protein 39	Arhgap39	0.00457509358724195	0.00500964688174254		1.00318	0.996834
Q7TQ95	Protein lunapark	Lnp	0.00467533535427478	0.013543936391612		1.00325	0.996765
P60904	DnaJ homolog subfamily C member 5	Dnajc5	0.0047175089518241	0.0170559765975686		1.00328	0.996735
Q9DCR2	AP-3 complex subunit sigma-1	Ap3s1	0.00473870171440893	0.0199272990925141		1.00329	0.996721
Q99LC8	Translation initiation factor eIF-2B subunit alpha	Eif2b1	0.00487603081597143	0.00817018482172272		1.00339	0.996626
Q9DCT5	Stromal cell-derived factor 2	Sdf2	0.00488217671712476	0.0103789652093219		1.00339	0.996622
P39053	Dynamin-1	Dnm1	0.00489849514431384	0.0280376666768961		1.0034	0.99661
Q8CHC4	Synaptojanin-1	Synj1	0.00494723849826428	0.031368037071357		1.00344	0.996577
Q9R0X4;Q32MW3	Acyl-coenzyme A thioesterase 9, mitochondrial;Acyl-coenzyme A thioesterase 10, mitochondrial	Acot9;Acot10	0.00528568691677478	0.0310807669525189		1.00367	0.996343
Q8BYA0	Tubulin-specific chaperone D	Tbcd	0.00542174445258325	0.00844351239610588		1.00377	0.996249
Q921S7	39S ribosomal protein L37, mitochondrial	Mrpl37	0.00543234083387389	0.00675559983297387		1.00377	0.996242
Q3UMC0;Q9D3R6	Spermatogenesis-associated protein 5;Katanin p60 ATPase-containing subunit A-like 2	Spata5;Katnal2	0.00553766886393348	0.0304493937156479		1.00385	0.996169
Q60648	Ganglioside GM2 activator	Gm2a	0.00556076897515112	0.00986084607019736		1.00386	0.996153
P14873	Microtubule-associated protein 1B;MAP1B heavy chain;MAP1 light chain LC1	Map1b	0.0055694580078125	0.0320071356531114		1.00387	0.996147
P48962	ADP/ATP translocase 1	Slc25a4	0.0058010949028855	0.0449665761086833		1.00403	0.995987
P62309	Small nuclear ribonucleoprotein G	Snrpg	0.00591807895236585	0.0188291114632269		1.00411	0.995906
P97429	Annexin A4	Anxa4	0.00604248046875	0.00852010390834075		1.0042	0.99582
Q6ZWN5	40S ribosomal protein S9	Rps9	0.00607999165852746	0.0255749084272848		1.00422	0.995795
Q9CQI6	Coactosin-like protein	Cotl1	0.00614145067003236	0.0171191288783064		1.00427	0.995752
O70435	Proteasome subunit alpha type-3	Psma3	0.00617027282714844	0.042833197592052		1.00429	0.995732
Q8BZ98	Dynamin-3	Dnm3	0.00639322068956361	0.070094156753587		1.00444	0.995578
Q80Y24	Prickle-like protein 2	Prickle2	0.00642352634006116	0.00666080781435703		1.00446	0.995557
Q9R0P5	Destrin	Dstn	0.00647226969400805	0.030272053708381		1.0045	0.995524
Q8K3X4	Interferon regulatory factor 2-binding protein-like	Irf2bpl	0.00652715894910827	0.00573724169521798		1.00453	0.995486
Q9JLJ2	4-trimethylaminobutyraldehyde dehydrogenase	Aldh9a1	0.00653054979112255	0.0364079748097814		1.00454	0.995484
Q60900	ELAV-like protein 3	Elavl3	0.00679948594835267	0.0425852572795784		1.00472	0.995298
P42932	T-complex protein 1 subunit theta	Cct8	0.0069658491346587	0.0736334643720387		1.00484	0.995183
P09055	Integrin beta-1	Itgb1	0.0070417192247163	0.0163181066918352		1.00489	0.995131
Q9DBJ1	Phosphoglycerate mutase 1	Pgam1	0.00760290357801807	0.029899802302715		1.00528	0.994744
Q8BUK6	Protein Hook homolog 3	Hook3	0.0076115926106759	0.0207771950542229		1.00529	0.994738
P62141	Serine/threonine-protein phosphatase PP1-beta catalytic subunit	Ppp1cb	0.00782203674316406	0.12263893629848		1.00544	0.994593
Q8R317	Ubiquilin-1	Ubqln1	0.00790532430012902	0.0376631230700007		1.00549	0.994535
O70492	Sorting nexin-3	Snx3	0.00814353095160669	0.0303517621048457		1.00566	0.994371
Q8R050	Eukaryotic peptide chain release factor GTP-binding subunit ERF3A	Gspt1	0.00820880466037366	0.036172171349371		1.00571	0.994326
Q6P2B1	Transportin-3	Tnpo3	0.00830544365776831	0.0243002046769117		1.00577	0.99426
Q99KB8	Hydroxyacylglutathione hydrolase, mitochondrial	Hagh	0.00836096869574732	0.023168522569056		1.00581	0.994221
Q9CQZ6	NADH dehydrogenase [ubiquinone] 1 beta subcomplex subunit 3	Ndufb3	0.00838279724121094	0.0335749964854339		1.00583	0.994206
Q9ESN9	C-Jun-amino-terminal kinase-interacting protein 3	Mapk8ip3	0.00844679938422388	0.0227173031865425		1.00587	0.994162
Q8BIQ5	Cleavage stimulation factor subunit 2	Cstf2	0.0084739261203346	0.0173157192000145		1.00589	0.994144
Q60676	Serine/threonine-protein phosphatase 5	Ppp5c	0.00852881537543482	0.0527412984234156		1.00593	0.994106
P24527	Leukotriene A-4 hydrolase	Lta4h	0.00861273871527857	0.0721699259723266		1.00599	0.994048
Q3TW96	UDP-N-acetylhexosamine pyrophosphorylase-like protein 1	Uap1l1	0.00879605611165246	0.0261357273110397		1.00612	0.993922
Q6ZWX6	Eukaryotic translation initiation factor 2 subunit 1	Eif2s1	0.00884119669596117	0.0585566428071931		1.00615	0.99389
Q8VE88	Protein FAM114A2	Fam114a2	0.00944179958767322	0.057447713612534		1.00657	0.993477
P61255	60S ribosomal protein L26	Rpl26	0.00944582621256629	0.0409995803751523		1.00657	0.993474
Q9QXS6	Drebrin	Dbn1	0.0100150638156471	0.0864450501254522		1.00697	0.993082
O70194	Eukaryotic translation initiation factor 3 subunit D	Eif3d	0.0100599924723319	0.0448121584665246		1.007	0.993051
Q3UX10	Tubulin alpha chain-like 3	Tubal3	0.0101532406277123	0.0164198504888		1.00706	0.992987
Q9CQE8	UPF0568 protein C14orf166 homolog		0.0102288987901495	0.0861835129025003		1.00712	0.992935
B1AWN6;A2ASI5	Sodium channel protein	Scn2a1;Scn3a	0.0105027092827683	0.0344463368484124		1.00731	0.992747
Q3U186	Probable arginine--tRNA ligase, mitochondrial	Rars2	0.0106800927056199	0.0169733544129056		1.00743	0.992624
Q9WV80	Sorting nexin-1	Snx1	0.0107640160454672	0.0236626695914158		1.00749	0.992567
O08756	3-hydroxyacyl-CoA dehydrogenase type-2	Hsd17b10	0.0109087626139299	0.0574115742171024		1.00759	0.992467
P70188	Kinesin-associated protein 3	Kifap3	0.010979546440975	0.0169590418575172		1.00764	0.992418
Q61753	D-3-phosphoglycerate dehydrogenase	Phgdh	0.0109937455919038	0.0232507303146593		1.00765	0.992409
Q3UVK0	Endoplasmic reticulum metallopeptidase 1	Ermp1	0.0113188425699882	0.0109561571998685		1.00788	0.992185
Q9JIX8	Apoptotic chromatin condensation inducer in the nucleus	Acin1	0.0113271077473946	0.0212613410567507		1.00788	0.992179
Q9CQW2	ADP-ribosylation factor-like protein 8B	Arl8b	0.0113707648383254	0.0554012002499629		1.00791	0.992149
Q8CHH9	Septin-8	Sept8	0.0114716423882371	0.0370204034366761		1.00798	0.99208
P23492	Purine nucleoside phosphorylase	Pnp	0.0115258958604585	0.0137569533383156		1.00802	0.992043
Q5SSM3	Rho GTPase-activating protein 44	Arhgap44	0.0115604400634766	0.0500643482130015		1.00805	0.992019
P41105	60S ribosomal protein L28	Rpl28	0.0116977691650391	0.0249777205385902		1.00814	0.991925
Q8BGR9	Ubiquitin-like domain-containing CTD phosphatase 1	Ublcp1	0.0117619832356759	0.0322203786469587		1.00819	0.99188
O35250	Exocyst complex component 7	Exoc7	0.0117774539523658	0.0735042436105231		1.0082	0.99187
Q9CWZ7	Gamma-soluble NSF attachment protein	Napg	0.0118075476752395	0.0557294002210998		1.00822	0.991849
Q6ZWZ2	Ubiquitin-conjugating enzyme E2 R2	Ube2r2	0.011936611599392	0.0191817597132236		1.00831	0.99176
Q9R118	Serine protease HTRA1	Htra1	0.0121271345350493	0.0257340232803146		1.00844	0.991629
Q9CQM9	Glutaredoxin-3	Glrx3	0.0121568044026681	0.0632969038909795		1.00846	0.991609
P08003	Protein disulfide-isomerase A4	Pdia4	0.0122881995307083	0.049331179701418		1.00855	0.991519
Q8BVE3	V-type proton ATPase subunit H	Atp6v1h	0.0124967363145636	0.0480896893986968		1.0087	0.991375
Q8C3X2	Coiled-coil domain-containing protein 90B, mitochondrial	Ccdc90b	0.0125213199191627	0.0149426301470039		1.00872	0.991358
Q9JHS3	Ragulator complex protein LAMTOR2	Lamtor2	0.0127243465847435	0.0458666528649252		1.00886	0.991219
P52196	Thiosulfate sulfurtransferase	Tst	0.0127987331814232	0.0430053327314419		1.00891	0.991168
Q6PD26	GPI transamidase component PIG-S	Pigs	0.012828614976673	0.0531927677212357		1.00893	0.991147
Q9CZB0	Succinate dehydrogenase cytochrome b560 subunit, mitochondrial	Sdhc	0.0128667619493292	0.0309008681290911		1.00896	0.991121
Q62443	Neuronal pentraxin-1	Nptx1	0.012874179416233	0.0159015283633257		1.00896	0.991116
Q60605	Myosin light polypeptide 6	Myl6	0.012913174099392	0.0332791777844962		1.00899	0.991089
Q80U95	Ubiquitin-protein ligase E3C	Ube3c	0.0130507151285819	0.0217023279599709		1.00909	0.990995
P61087	Ubiquitin-conjugating enzyme E2 K	Ube2k	0.0131030612521705	0.0551715213854383		1.00912	0.990959
Q3UKJ7	WD40 repeat-containing protein SMU1;WD40 repeat-containing protein SMU1, N-terminally processed	Smu1	0.0133152008056641	0.0352512214955712		1.00927	0.990813
Q99LF4	tRNA-splicing ligase RtcB homolog	Rtcb	0.0133323669433594	0.0908977573699477		1.00928	0.990801
Q8BP48	Methionine aminopeptidase 1	Metap1	0.0134550730387346	0.0341619469573907		1.00937	0.990717
Q80TQ2	Ubiquitin carboxyl-terminal hydrolase CYLD	Cyld	0.0134983062744141	0.0223797474909326		1.0094	0.990687
Q9D1J3	SAP domain-containing ribonucleoprotein	Sarnp	0.0138643052842902	0.0293465778810187		1.00966	0.990436
Q9EPQ7	StAR-related lipid transfer protein 5	Stard5	0.0142756568060953	0.0227263371682474		1.00994	0.990154
Q9WVR4	Fragile X mental retardation syndrome-related protein 2	Fxr2	0.0143157111273879	0.018496114874667		1.00997	0.990126
Q6PDN3	Myosin light chain kinase, smooth muscle;Myosin light chain kinase, smooth muscle, deglutamylated form	Mylk	0.0145505269368478	0.00645712367822296		1.01014	0.989965
P47802	Metaxin-1	Mtx1	0.0147768656412772	0.0572629374287786		1.0103	0.98981
Q9WTX6	Cullin-1	Cul1	0.0148050520155145	0.0414409697494329		1.01031	0.98979
Q8CI32	BAG family molecular chaperone regulator 5	Bag5	0.0148436228434257	0.0403002283423224		1.01034	0.989764
P99029	Peroxiredoxin-5, mitochondrial	Prdx5	0.0148718092176665	0.0816151970371664		1.01036	0.989745
P39054	Dynamin-2	Dnm2	0.0149167378743478	0.0346309741475836		1.01039	0.989714
Q5M8N0	CB1 cannabinoid receptor-interacting protein 1	Cnrip1	0.0149599711100272	0.0421635269748362		1.01042	0.989684
Q8K341	Alpha-tubulin N-acetyltransferase 1	Atat1	0.0151988135443766	0.0477567072813824		1.01059	0.98952
A2ASZ8	Calcium-binding mitochondrial carrier protein SCaMC-2	Slc25a25	0.0152286953396263	0.0180196546493853		1.01061	0.9895
Q8BH95	Enoyl-CoA hydratase, mitochondrial	Echs1	0.0152356889512788	0.0605145829101249		1.01062	0.989495
Q3UFK8	FERM domain-containing protein 8	Frmd8	0.0155018700493699	0.0375154805486378		1.0108	0.989312
Q8VE33	Ganglioside-induced differentiation-associated protein 1-like 1	Gdap1l1	0.0157510969373895	0.0832285449817146		1.01098	0.989142
Q8C015	Serine/threonine-protein kinase PAK 7	Pak7	0.0160098605685768	0.0240478339228605		1.01116	0.988964
O55106	Striatin	Strn	0.0160164303249779	0.0967536656271358		1.01116	0.98896
Q7TN33	CUGBP Elav-like family member 6	Celf6	0.0161101023356132	0.0216741529515297		1.01123	0.988895
Q8R3V5	Endophilin-B2	Sh3glb2	0.0163817935519752	0.107651814409326		1.01142	0.988709
Q9CXS4	Centromere protein V	Cenpv	0.0164828830295143	0.04852312579467		1.01149	0.98864
Q91VR5	ATP-dependent RNA helicase DDX1	Ddx1	0.0165303548177107	0.144028419716136		1.01152	0.988607
Q60930	Voltage-dependent anion-selective channel protein 2	Vdac2	0.0166926913791237	0.106380126173651		1.01164	0.988496
Q9R1P0	Proteasome subunit alpha type-4	Psma4	0.016712612575958	0.188340502091734		1.01165	0.988483
Q03141	MAP/microtubule affinity-regulating kinase 3	Mark3	0.0168717702229806	0.0776338825752389		1.01176	0.988373
P60469	Liprin-alpha-3	Ppfia3	0.0168927510579415	0.0512260536214042		1.01178	0.988359
A2A690	Protein TANC2	Tanc2	0.0169292026095924	0.0529670341239626		1.0118	0.988334
Q8BWM0	Prostaglandin E synthase 2;Prostaglandin E synthase 2 truncated form	Ptges2	0.0171864827473946	0.0488352726229339		1.01198	0.988158
P51859	Hepatoma-derived growth factor	Hdgf	0.0172235700819243	0.060940903649192		1.01201	0.988133
Q9D6R2	Isocitrate dehydrogenase [NAD] subunit alpha, mitochondrial	Idh3a	0.0173454284667969	0.0864135432923056		1.0121	0.988049
Q62470	Integrin alpha-3;Integrin alpha-3 heavy chain;Integrin alpha-3 light chain	Itga3	0.0175431569417306	0.041654431347454		1.01223	0.987914
P47857	ATP-dependent 6-phosphofructokinase, muscle type	Pfkm	0.0175514221191406	0.137995102085952		1.01224	0.987908
P57776	Elongation factor 1-delta	Eef1d	0.017904069688587	0.075617191081988		1.01249	0.987667
O54984	ATPase Asna1	Asna1	0.0179765489366304	0.0892603471748627		1.01254	0.987617
O35350	Calpain-1 catalytic subunit	Capn1	0.0180259280734596	0.054706040084793		1.01257	0.987583
Q6P9R2	Serine/threonine-protein kinase OSR1	Oxsr1	0.0181140899658203	0.0643278462397912		1.01263	0.987523
Q5SS80	Dehydrogenase/reductase SDR family member 13	Dhrs13	0.0183200836181641	0.0219639439707839		1.01278	0.987382
E9PVA8		Gcn1l1	0.0186121198866118	0.0675341199640149		1.01298	0.987182
P67778	Prohibitin	Phb	0.0186152988009987	0.13791117282746		1.01299	0.98718
P47809	Dual specificity mitogen-activated protein kinase kinase 4	Map2k4	0.0186591678195533	0.118251692169615		1.01302	0.98715
Q08093	Calponin-2	Cnn2	0.0188257429334833	0.023461196441723		1.01313	0.987036
P28659	CUGBP Elav-like family member 1	Celf1	0.0189310709635429	0.0671850465371369		1.01321	0.986964
Q04447	Creatine kinase B-type	Ckb	0.0189387003580705	0.0554296021946345		1.01321	0.986958
Q9DBS2	Tumor protein p63-regulated gene 1-like protein	Tprg1l	0.0193826887342645	0.0570322412697363		1.01353	0.986655
Q9JHW2	Omega-amidase NIT2	Nit2	0.0197041829427071	0.0872944191589469		1.01375	0.986435
Q7TMC8		Fuk	0.0198741488986549	0.0396352548753477		1.01387	0.986319
O08795	Glucosidase 2 subunit beta	Prkcsh	0.0199871063232422	0.186684241864238		1.01395	0.986242
Q8K3A0	Iron-sulfur cluster co-chaperone protein HscB, mitochondrial	Hscb	0.0200042724609375	0.0405639778139602		1.01396	0.98623
Q9ESX5	H/ACA ribonucleoprotein complex subunit 4	Dkc1	0.0200277964274065	0.03783846971297		1.01398	0.986214
P18608	Non-histone chromosomal protein HMG-14	Hmgn1	0.020418802897133	0.040379668348706		1.01425	0.985946
Q3TDN2	FAS-associated factor 2	Faf2	0.0205773247612839	0.126169952732194		1.01437	0.985838
P58389	Serine/threonine-protein phosphatase 2A activator	Ppp2r4	0.0206389957004127	0.0905893817335036		1.01441	0.985796
Q76MZ3	Serine/threonine-protein phosphatase 2A 65 kDa regulatory subunit A alpha isoform	Ppp2r1a	0.0206851959228516	0.275130486560061		1.01444	0.985764
P62761	Visinin-like protein 1	Vsnl1	0.0207212236192476	0.127682324669621		1.01447	0.98574
O55100	Synaptogyrin-1	Syngr1	0.0207271575927734	0.0618512382945944		1.01447	0.985736
P62192	26S protease regulatory subunit 4	Psmc1	0.0207400851779518	0.146294111131677		1.01448	0.985727
O08547	Vesicle-trafficking protein SEC22b	Sec22b	0.0209382375081404	0.13418391605621		1.01462	0.985592
Q7TNM2	Tripartite motif-containing protein 46	Trim46	0.0210032992892799	0.063718890836288		1.01466	0.985547
Q61249	Immunoglobulin-binding protein 1	Igbp1	0.0211397806803362	0.0482963960084303		1.01476	0.985454
O88704	Potassium/sodium hyperpolarization-activated cyclic nucleotide-gated channel 1	Hcn1	0.0211828019883917	0.0552348463617931		1.01479	0.985424
Q80UP5;Q6PD24	Ankyrin repeat domain-containing protein 13A;Ankyrin repeat domain-containing protein 13D	Ankrd13a;Ankrd13d	0.0214282141791458	0.0431577829011457		1.01496	0.985257
Q8K596		Slc8a2	0.0215242173936616	0.0650393720609267		1.01503	0.985191
P23818	Glutamate receptor 1	Gria1	0.0217174953884545	0.114747201995326		1.01517	0.985059
Q9WTN0	Geranylgeranyl pyrophosphate synthase	Ggps1	0.022646586100258	0.0722230115244787		1.01582	0.984425
Q7TMB8	Cytoplasmic FMR1-interacting protein 1	Cyfip1	0.0229958428276902	0.087434062266515		1.01607	0.984187
Q9DAR7	m7GpppX diphosphatase	Dcps	0.0231583913167341	0.0757999072861479		1.01618	0.984076
Q64520	Guanylate kinase	Guk1	0.0233900282118036	0.10588484520971		1.01634	0.983918
Q9D5T0	ATPase family AAA domain-containing protein 1	Atad1	0.0233953264024542	0.144785538764422		1.01635	0.983914
P97461	40S ribosomal protein S5;40S ribosomal protein S5, N-terminally processed	Rps5	0.0237490336100237	0.0833967593774233		1.0166	0.983673
Q6ZPE2	Myotubularin-related protein 5	Sbf1	0.023868984646267	0.0892722563559963		1.01668	0.983591
Q9CQR4	Acyl-coenzyme A thioesterase 13;Acyl-coenzyme A thioesterase 13, N-terminally processed	Acot13	0.0239096747504348	0.0508602722710225		1.01671	0.983564
F8VPU2	FERM, RhoGEF and pleckstrin domain-containing protein 1	Farp1	0.024381001790367	0.251634547494732		1.01704	0.983242
O35593	26S proteasome non-ATPase regulatory subunit 14	Psmd14	0.0248841179741746	0.104919148265344		1.0174	0.9829
Q60737	Casein kinase II subunit alpha	Csnk2a1	0.0250523885091134	0.136548178747088		1.01752	0.982785
Q11011	Puromycin-sensitive aminopeptidase	Npepps	0.0253753662109375	0.255169067227946		1.01774	0.982565
[truncated: 1,494 more rows]
